1 **Transcriptional profiling reveals TRPM5-expressing cells involved in viral infection in the**  
2 **olfactory epithelium**

3  
4 B. Dnate' Baxter<sup>1,2,‡</sup>, Eric D. Larson<sup>3,‡</sup>, Paul Feinstein<sup>4</sup>, Arianna Gentile Polese<sup>1,2</sup>, Andrew N.  
5 Bubak<sup>5</sup>, Christy S. Niemeyer<sup>5</sup>, James Hassell, Jr.<sup>5</sup>, Laetitia Merle<sup>1,2</sup>, Doug Shepherd<sup>6</sup>, Vijay R.  
6 Ramakrishnan<sup>3</sup>, Maria A. Nagel<sup>5</sup>, and Diego Restrepo<sup>1,2,\*</sup>

7  
8 <sup>1</sup>Neuroscience Graduate Program, University of Colorado Anschutz Medical Campus, Aurora,  
9 CO 80045, USA

10 <sup>2</sup>Department of Cell and Developmental Biology, University of Colorado Anschutz Medical  
11 Campus, Aurora, CO 80045, USA

12 <sup>3</sup>Department of Otolaryngology, University of Colorado Anschutz Medical Campus, Aurora, CO  
13 80045, USA

14 <sup>4</sup>Department of Biological Sciences, Hunter College, CUNY, New York, NY, 10065, USA

15 <sup>5</sup>Department of Neurology, University of Colorado Anschutz Medical Campus, Aurora, CO  
16 80045, USA

17 <sup>6</sup>Department of Pharmacology, University of Colorado Anschutz Medical Campus and  
18 Center for Biological Physics and Department of Physics, Arizona State University, USA

19

20

21

22 <sup>‡</sup>Co-first authors

23 <sup>\*</sup>Corresponding author: Diego Restrepo, [diego.restrepo@cuanschutz.edu](mailto:diego.restrepo@cuanschutz.edu)

24

25 **Abstract**

26 **Background:** Understanding viral infection of the olfactory epithelium is essential because  
27 smell loss can occur with coronavirus disease 2019 (COVID-19), caused by severe acute  
28 respiratory syndrome coronavirus clade 2 (SARS-CoV-2), and because the olfactory nerve is an  
29 important route of entry for viruses to the central nervous system. Specialized chemosensory  
30 epithelial cells that express the transient receptor potential cation channel subfamily M member 5  
31 (TRPM5) are found throughout the airways and intestinal epithelium and are involved in  
32 responses to viral infection.

33 **Results:** Herein we performed deep transcriptional profiling of olfactory epithelial cells sorted  
34 by flow cytometry based on the expression of fluorescent protein markers for olfactory sensory  
35 neurons and TRPM5 in the mouse (*Mus musculus*). We find profuse expression of transcripts  
36 involved in inflammation, immunity and viral infection in TRPM5-expressing microvillous cells  
37 and olfactory sensory neurons. These cells express the *Tmprss2* transcript that encodes for a  
38 serine protease that primes the SARS-CoV-2 spike protein before entry into host cells. Intranasal  
39 infection with herpes simplex virus type 1 (HSV-1) elicited a decrease in olfactory sensory  
40 neurons.

41 **Conclusion:** Our study provides new insights into a potential role for TRPM5-expressing cells in  
42 viral infection of the olfactory epithelium. We find that, as found for solitary chemosensory cells  
43 (SCCs) and brush cells in the airway epithelium, and for tuft cells in the intestine, the  
44 transcriptome of TRPM5-expressing microvillous cells and olfactory sensory neurons indicates  
45 that they are likely involved in the inflammatory response elicited by viral infection of the  
46 olfactory epithelium.

- 47 **Keywords:** Olfactory sensory neurons, Microvillous cells, Viral infection, Immunity,  
48 Inflammation, Mouse

## 49 **Background**

50 Self-reported loss of smell in a large fraction of patients with coronavirus disease 2019 (COVID-  
51 19), caused by severe acute respiratory syndrome coronavirus clade 2 (SARS-CoV-2),  
52 (Giacomelli et al., 2020; Parma et al., 2020; Yan et al., 2020a; Yan et al., 2020b) raises the  
53 question of how SARS-CoV-2 affects olfaction in a subset of patients. Entry of SARS-CoV-2  
54 into cells is mediated by spike protein attachment to the SARS-CoV receptor ACE2 followed by  
55 spike protein priming by the serine protease TMPRSS2 (Hoffmann et al., 2020). Chemosensory  
56 cells found in the airway (SCCs/brush cells) and intestinal epithelium (tuft cells) express the  
57 transient receptor potential cation channel subfamily M member 5 (TRPM5) and other elements  
58 of the taste transduction pathway and have been implicated in immune and inflammatory  
59 responses to bacterial, viral and parasitic infection (Luo et al., 2019; Maina et al., 2018; O'Leary  
60 et al., 2019; Perniss et al., 2020; Rane et al., 2019; Saunders et al., 2014; Tizzano et al., 2010). In  
61 the olfactory epithelium TRPM5 and other proteins involved in taste transduction are also  
62 expressed in SCC-like microvillous cells (MVCs)(Genovese and Tizzano, 2018; Lin et al.,  
63 2008), which have been proposed to be involved in a protective response to high concentrations  
64 of odorants (Fu et al., 2018; Lemons et al., 2017). The ACE2 receptor and TMPRSS2 are  
65 expressed in support cells, stem cells, and MVCs (Brann et al., 2020; Fodouljian et al., 2020).  
66 However, whether MVCs play a role in viral infection or viral infection defense of the olfactory  
67 epithelium is unknown.

68

69 Herein, we performed transcriptional profiling of MVCs and a subset of olfactory sensory  
70 neurons (OSNs) expressing eGFP under control of the TRPM5 promoter (OSN\_eGFP+  
71 cells)(Lin et al., 2007; Lopez et al., 2014). In order to profile these low abundance cells we used



72 a modified version of Probe-Seq, which allows deep transcriptional profiling of specific cell  
73 types identified by fluorescent markers as the defining feature (Amamoto et al., 2019). We  
74 crossed a mouse expressing mCherry in the nuclei of OSNs under control of the OMP promoter  
75 (OMP-H2B::mCherry mice) with TRPM5-eGFP transgenic mice (Clapp et al., 2006) (OMP-  
76 H2B::mCherry/TRPM5-eGFP mice). We isolated cells from the olfactory epithelium and used  
77 fluorescence-activated cell sorting (FACS) to sort MVC\_eGFP cells (mCherry negative and  
78 eGFP positive) and cells labeled by OMP-driven mCherry that did or did not express eGFP  
79 (OSN\_eGFP+ and OSN\_eGFP- cells) followed by transcriptional profiling by RNA sequencing  
80 (RNAseq).

81

82

83 **Results**

84

85 **Fluorescence-activated cell sorting of cells isolated from the main olfactory epithelium.** The  
86 olfactory epithelium of OMP-H2B::mCherry/TRPM5-eGFP mice expressed nuclear mCherry  
87 driven by the OMP promoter in the intermediate layer of the olfactory epithelium (Figures 1a), as  
88 expected for the location of nuclei of mature OSNs (Farbman and Margolis, 1980). eGFP  
89 expression driven by the TRPM5 promoter was found in MVCs, with cell bodies located mostly  
90 in the apical layer of the epithelium (asterisks), and at lower expression levels in a subset of  
91 OSNs double-labeled with mCherry (Figure 1a), consistent with earlier publications (Lin et al.,  
92 2008; Lin et al., 2007; Pyrski et al., 2017).

93

94 We proceeded to isolate cells from the main olfactory epithelium of OMP-  
95 H2B::mCherry/TRPM5-eGFP mice (see Methods, Figure 1b). Figure 1c shows two isolated  
96 OSNs with differential expression of eGFP. Using flow cytometry we found that fluorescence  
97 intensity of individual cells for mCherry and eGFP spanned several orders of magnitude (Figure  
98 1d). We proceeded to sort three groups of cells: high mCherry-expressing cells with low and  
99 high eGFP fluorescence (presumably mature OSNs, these cells are termed OSN\_eGFP- and  
100 OSN\_eGFP+ cells respectively) and cells with low mCherry and high eGFP expression  
101 (MVC\_eGFP, presumably MVCs). Reverse transcription quantitative PCR (RT-qPCR) showed  
102 that, as expected the OSN\_eGFP- and OSN\_eGFP+ cells have higher levels of OMP transcript  
103 than MVC\_eGFP cells (Figure 1e,i), and OSN\_eGFP+ cells and MVC\_eGFP cells have higher  
104 levels of eGFP transcript compared to OSN\_eGFP- cells (Figure 1e,ii). Furthermore, compared  
105 to OSN\_eGFP- cells both the MVC\_eGFP cells and OSN\_eGFP+ cells expressed higher levels

106 of TRPM5 transcript (Figure 1e,iii) and choline acetyl transferase (ChAT)(Figure 1e,iv), a  
107 protein involved in acetylcholine neurotransmission that is expressed in MVCs (Ogura et al.,  
108 2011). The asterisks in Figure 1e denote significant differences tested with either t-test or  
109 ranksum with p-values below the p-value of significance corrected for multiple comparisons  
110 using the false discovery rate (pFDR)(Curran-Everett, 2000) (pFDR is 0.033 for OMP, 0.05 for  
111 TRPM5, 0.05 for EGFP and 0.03 for ChAT, n=8 for OMP OSN\_eGFP-, 4 for OMP  
112 OSN\_eGFP+ and 4 for MVC\_eGFP cells).

113

114 **The number of OSN\_eGFP+ cells sorted by FACS is decreased when OMP-**  
115 **H2B::mCherry/TRPM5-eGFP mice are placed in ventilated cages.** In our vivarium we have  
116 ventilated cages (HV cages) where air is mechanically exchanged with fresh air once every  
117 minute and static cages (LV cages) where air is exchanged passively through a filter in the cover.  
118 When we moved the OMP-H2B::mCherry/TRPM5-eGFP to HV cages we noticed a decrease in  
119 the number of OSN\_eGFP+ cells sorted per mouse (Figures 2a,b and c), suggesting that changes  
120 in ventilation conditions affect TRPM5 promoter-driven expression of eGFP. Following this  
121 observation, mice were moved back to LV cages. We proceeded to study the dependence of the  
122 number of OSN\_eGFP+ cells sorted on the number of days in LV vs. HV cages. The number of  
123 OSN\_eGFP+ cells is positively correlated with the number of days the animal spends in LV  
124 cages (Figure 2d) and negatively correlated to the number of days the animals spend in the HV  
125 cages (Figure 2e). Generalized linear model (GLM) analysis found significant differences for the  
126 number of OSN\_eGFP+ cells sorted as a function of the number of days in LV cages ( $p < 0.05$ , 26  
127 observations, 24 d.f., F-statistic = 5.64, p-value for GLM  $< 0.05$ ) and the number of days in HV  
128 cages ( $p < 0.05$ , 26 observations, 24 d.f., F-statistic = 5.99, p-value for GLM  $< 0.05$ ). For RNAseq

129 experiments one FACS sort was done using cells from mice born and maintained in HV housing,  
130 and the OSN\_eGFP+ yield was low. Subsequently, we performed all FACS with cells isolated  
131 from the olfactory epithelium of mice raised in LV cages.

132

133 **Coverage of TRPM5 transcript by RNAseq encompasses the full transcript in MVC\_eGFP**

134 **cells and OSN\_eGFP+ cells.** Pyrski and co-workers did not find full-length TRPM5 transcript

135 in reverse transcriptase polymerase chain reactions with mRNA extracted from isolated OSNs

136 from the adult mouse and did not find *in situ* signal in the OSN layer of the olfactory epithelium

137 for the full-length TRPM5 transcript (Pyrski et al., 2017). These investigators found full-length

138 TRPM5 transcript and strong *in situ* signal in MVCs. We find strong *in situ* signal for TRPM5 in

139 MVC\_eGFP cells located in the apical layer of the olfactory epithelium (Figure 3a<sub>ii</sub>, asterisks).

140 In addition, we find sparse TRPM5 *in situ* labeling in the nuclear OSN layer (Figure 3a<sub>ii</sub>,

141 arrows). In order to gain a better understanding of which TRPM5 transcript is expressed in OSNs

142 we performed an analysis of TRPM5 transcript coverage for the RNAseq performed with RNA

143 from the different groups of cells sorted by FACS. Consistent with *in situ* labeling, TRPM5

144 transcript was significantly higher in OSN\_eGFP+ cells compared to OSN\_eGFP- cells and in

145 MVC\_eGFP cells compared to OSN\_eGFP- cells in both male and female adult mice (Figures

146 3b,c). To explore RNA sequencing coverage of individual *Trpm5* exons, we computed read

147 depth over the sequence of the *Trpm5* gene for each sample. We found coverage for all exons in

148 OSN\_eGFP+ cells and for all exons except exon 1 and 5'UTR1 in MVC\_eGFP cells, but there

149 was no coverage in OSN\_eGFP- cells (Figures 3b,c). GLM analysis found statistically

150 significant differences for exons ( $p < 0.001$ , 450 observations, 446 d.f., F-statistic = 33.8, p-value

151 for GLM  $< 0.001$ ), but no overall significance between MVC and OSN\_eGFP+ groups ( $p > 0.05$ ,

152 450 observations, 446 d.f., F-statistic = 33.8, p-value for GLM <0.001). However, post-hoc  
153 ranksum tests did yield significant differences between MVC and OSN\_eGFP+ groups for exon  
154 1 and 5'UTR1 (p<pFDR=0.0033). We observed no differences in coverage between male and  
155 female mice (within MVC\_eGFP cells: p>0.05, 210 observations, 206 d.f., F-statistic = 22.8, p  
156 value for GLM <0.001; within OSN\_eGFP+: p>0.05, 240 observations, 236 d.f., F-statistic =  
157 11.5, p value for GLM <0.001). Together, these data suggest that both OSN\_eGFP+ cells and  
158 MVC\_eGFP cells are capable of expressing full-length TRPM5 transcript.

159

160 **RNAseq indicates that OSN\_eGFP+, OSN\_eGFP- and MVC are three distinct groups of**  
161 **chemosensory cells in the mouse olfactory epithelium.** Differential gene expression analysis of  
162 the RNAseq data was used to compare the three olfactory epithelium cell groups sorted by  
163 FACS. We found that expression of 2000 genes was significantly higher in OSN\_eGFP+  
164 compared to OSN\_eGFP-, and expression of 1821 genes was lower in OSN\_eGFP+ cells (Figure  
165 4 -figure supplement 1 shows the results of RNAseq and Figure 4 -figure supplement 2 shows  
166 the metadata). Figure 4a shows expression levels for the transcripts that showed the largest  
167 differences between OSN\_eGFP+ and OSN\_eGFP- cells. The transcripts for TRPM5 and eGFP  
168 were among the top 10 genes whose transcription was higher in OSN\_eGFP+ compared to  
169 OSN\_eGFP- with 105-fold and 42-fold increases respectively. This top 10 OSN\_eGFP+  
170 upregulated group also includes *Avil* and *Adgrg6* that are involved in remodeling processes after  
171 peripheral nerve injury (Chuang et al., 2018; Jablonka-Shariff et al., 2020) and *Espn*, encoding  
172 for espin, a protein playing a structural role in microvilli of chemosensory cells (Sekerko et al.,  
173 2004). Interestingly, the olfactory activity-dependent protein S100a5 (Fischl et al., 2014) is  
174 found among the top 10 OSN\_eGFP+ downregulated transcripts suggesting that in these mice

175 the OSN\_eGFP+ are not stimulated by the odorants in their housing environment (Figure 4a).  
176 Additionally, a majority of the olfactory receptors show decreased transcription in OSN\_eGFP+  
177 compared to OSN\_eGFP- cells (Figures 4a,b) and the volcano plot for olfactory receptor  
178 transcript expression shows only 25 olfactory receptors show increased expression in  
179 OSN\_eGFP+ cells (Figure 4c, based on fold change > 4 and average expression > 100 counts,  
180 Table 1).

181  
182 Expression of 4386 genes was significantly higher in MVC\_eGFP cells compared to  
183 OSN\_eGFP- cells, and expression of 5630 genes was lower in MVC\_eGFP cells (Figure 5 –  
184 figure supplement 1). Transcripts for 550 olfactory receptors were lower in MVC\_eGFP cells  
185 (Figure 5 – figure supplement 1), and no olfactory receptors were upregulated in MVC\_eGFP  
186 cells compared to OSN\_eGFP-. Figure 5a shows expression levels for the transcripts with the  
187 largest differences between MVC\_eGFP cells and OSN\_eGFP- cells. Six of the transcripts that  
188 are within the top 10 upregulated genes found in MVC\_eGFP cells compared to OSN\_eGFP-  
189 cells (Figure 5a) are also found within the 10 top upregulated transcripts when OSN\_eGFP+ cells  
190 are compared to OSN\_eGFP- cells (Figure 4a)(*Adgrg6*, *Avil*, *Cd24a*, *eGFP*, *Espn* and *Trpm5*).  
191 TRPM5 and eEGFP were among the top 10 genes whose transcription was higher in  
192 MVC\_eGFP cells compared to OSN\_eGFP- cells with 1471-fold and 75-fold differences  
193 respectively. Interestingly, *Pou2f3*, a transcription factor important in differentiation of MVCs  
194 (Yamaguchi et al., 2014; Yamashita et al., 2017), is found within the top 10 upregulated genes  
195 found in MVC\_eGFP cells compared to OSN\_eGFP- (Figure 5a) and is also significantly higher  
196 in OSN\_eGFP+ cells compared to OSN\_eGFP- cells (Figure 5 – figure supplement 1). Finally,  
197 *OMP* and *s100a5*, genes for two proteins expressed in mature OSNs (Farbman and Margolis,

198 1980; Fischl et al., 2014), were among the top 10 downregulated transcripts in MVC\_eGFP cells  
199 compared to OSN\_eGFP- cells (Figure 5a).

200

201 We found expression of 3068 genes which was significantly higher in MVC\_eGFP cells  
202 compared to OSN\_eGFP+ cells, and expression of 4060 genes was lower in MVC\_eGFP cells  
203 (Figure 5 – figure supplement 2). Figure 5b shows expression levels for the genes that showed  
204 the largest differences between MVC and OSN\_eGFP+ cells. Among the 10 genes that are  
205 highly expressed in OSN\_eGFP+ cells compared to MVC\_eGFP cells we find *Pde4a*, a gene  
206 expressed in mature OSNs (Juilfs et al., 1997) (*OMP* is also significantly higher in OSN\_eGFP+  
207 cells, but is not among the top 10 genes, Figure 5 – figure supplement 2). Interestingly, *Hcn2*, a  
208 gene that encodes for a hyperpolarization-activated cAMP channel that has been postulated to  
209 participate in OSN axon growth and glomerular innervation (Mobley et al., 2010), is found in the  
210 top 10 upregulated OSN\_eGFP+ genes. Finally, the gene encoding for the synaptic protein  
211 Snap25 is found in the top 10 upregulated lists for both OSN\_eGFP+ and OSN\_eGFP- indicating  
212 that both OSNs are involved in synaptic transmission (Figures 5a and b).

213

214 We did not find major differences in transcriptome profiling between males and females for  
215 genes that were differentially expressed between the three cell groups (Figure 5 – figure  
216 supplement 3,4). We found a substantial number of olfactory receptor genes that were  
217 differentially expressed between males and females (Figure 5 – figure supplement 4).

218 Surprisingly, the differentially expressed olfactory receptors differed from receptors identified by  
219 van der Linden et al. (van der Linden et al., 2018). Finally, we compared expression of  
220 transcripts involved in taste transduction, canonical olfactory transduction, and non-canonical

221 OSNs (Figure 4d). The non-canonical OSNs considered here included guanylyl-cyclase D (GC-  
222 D) OSNs (Juilfs et al., 1997), *Trpc2* OSNs (Omura and Mombaerts, 2014) and *Cav2.1* OSNs  
223 (Pyrski et al., 2018). Both OSN\_eGFP<sup>+</sup> and OSN\_eGFP<sup>-</sup> expressed low levels of *Cancn1a*  
224 encoding for *Cav2.1* and *Trpc2*. OSN\_eGFP<sup>-</sup> expressed higher levels of Trace amine-associated  
225 receptors (Liberles, 2015) than OSN\_eGFP<sup>+</sup> cells. Both OSN\_eGFP<sup>+</sup> and OSN\_eGFP<sup>-</sup>  
226 expressed transcripts for OMP, BBS1 and 2 and proteins involved in the canonical olfactory  
227 transduction pathway, markers of canonical OSNs.

228

229 **Gene ontology enrichment analysis reveals differences in chemosensory transduction and**  
230 **synaptic vesicle function between the three groups of cells.** Perusal of the top differences  
231 between the three cell groups suggested that these are distinct chemosensory cell types found in  
232 the olfactory epithelium. Both OSN\_eGFP<sup>+</sup> and OSN\_eGFP<sup>-</sup> share expression of OSN-specific  
233 transcripts, express distinct subsets of olfactory receptors and differ in expression of the activity-  
234 dependent transcript *SI00a5*, and MVC\_eGFP cells differ from both OSN groups in expression  
235 of transcripts for synaptic transmission and for markers of mature OSNs and microvillous cells.  
236 In order to perform a thorough analysis of the differences between these chemosensory cell  
237 groups we performed an analysis of gene ontology (GO) enrichment for lists of genes related to  
238 chemosensory perception. When compared with either OSN\_eGFP<sup>+</sup> or OSN\_eGFP<sup>-</sup> we found  
239 that MVC\_eGFP cells were enriched for transcripts for the gene ontology list of sensory  
240 perception of sweet/umami taste (GO:0050916 and GO:0050917) (Figure 5d, Figure 5 – figure  
241 supplements 3,4) involving taste detection/transduction proteins that have been reported to be  
242 expressed in MVCs (Genovese and Tizzano, 2018; Hegg et al., 2010): *Gnat3*, encoding for  
243 gustducin, the G protein mediating sweet and umami taste transduction (McLaughlin et al.,



244 1992), *Itpr3*, encoding for the inositol-1,4,5-triphosphate receptor type 3 and *Tas1r3*, encoding  
245 for a gustducin-coupled receptor involved in umami and sweet taste (Damak et al., 2003; Zhang  
246 et al., 2003). Interestingly, the GO lists for sensory perception of sweet/umami taste  
247 (GO:0050916 and GO:0050917) and other lists for sensory and taste perception (GO:0050906,  
248 GO:0050912) are enriched in OSN\_eGFP+ cells compared to OSN\_eGFP- cells (Figure 4e,  
249 Figure 4 – figure supplement 3, including *Gnat3*, *Itpr3*, *Tas1r3*). Furthermore, gene ontology  
250 analysis for OSN\_eGFP+ cells compared to OSN\_eGFP- cells finds decreased enrichment for  
251 sensory perception of smell (GO:0007608) and G protein-coupled receptor signaling pathways  
252 (GO:0007186) that include a large number of olfactory receptors and transcripts encoding for  
253 proteins involved in peripheral olfaction such as *Gfy*, *Omp*, *Pde1c* and *Pde4a* (GO:0007608) and  
254 *Dgkg*, *Gng13*, *Itgb1*, *Nsg1* (GO:0007186). Finally, enrichment of gene ontology lists for synaptic  
255 vesicle function were decreased for MVC\_eGFP cells compared with either OSN\_eGFP+ or  
256 OSN\_eGFP- cells (Figure 5c,d). Results of this gene ontology analysis of chemosensation and  
257 synaptic vesicle function reinforces the finding that the three cell groups in this study are distinct  
258 chemosensory cell types of the olfactory epithelium. OSN\_eGFP+ cells are related to  
259 MVC\_eGFP cells because of expression of taste perception gene ontology, but differ from  
260 MVC\_eGFP cells in expression of olfactory receptors and transcripts related to synaptic function  
261 as expected for an OSN.

262

263 **Gene ontology analysis finds enrichment of lists of viral-related, inflammation and immune**  
264 **transcripts in MVC\_eGFP cells and OSN\_eGFP+ cells.** SCCs, tuft and brush cells have been  
265 implicated in responses to bacterial and viral infection, immunity and inflammation (Luo et al.,  
266 2019; Maina et al., 2018; O'Leary et al., 2019; Perniss et al., 2020; Rane et al., 2019; Saunders et

267 al., 2014; Tizzano et al., 2010; Ualiyeva et al., 2020). The fact that MVCs are closely related to  
268 these cells (Fu et al., 2018; Genovese and Tizzano, 2018; Ogura et al., 2011) lead us to search for  
269 gene ontology enrichment related to bacterial and viral infection, immunity and inflammation for  
270 MVC\_eGFP cells. We found robust enrichment of these gene ontologies in MVC\_eGFP cells  
271 and OSN\_eGFP+ cells (Figures 4e, 5c,d). Transcripts related to viral infection that were higher  
272 in MVC\_eGFP cells and OSN\_eGFP+ cells compared to OSN\_eGFP- cells (Figure 6) including  
273 those involved in viral entry into host cells, viral transcription and regulation of viral  
274 transcription, negative regulation of viral genome replication and negative regulation of viral  
275 process (Figures 4e, 5c, Figure 6 – figure supplements 1-3). We also found gene ontology  
276 enrichment in MVC\_eGFP cells and OSN\_eGFP+ cells compared to OSN\_eGFP- cells for  
277 defense response to bacterium (Figure 6 – figure supplements 1-3).

278  
279 Importantly, we also find enrichment for transcript expression for immunity and inflammation  
280 (Figures 4e, 5c,d and Figure 6 – figure supplements 1-3). Genes related to inflammation and  
281 immunity that were higher in MVC\_eGFP cells and OSN\_eGFP+ cells compared to  
282 OSN\_eGFP- cells are shown in Figure 6 – figure supplements 4-7. Among these transcripts *IL25*  
283 and its receptor *Il17rb* are enriched in both MVC\_eGFP cells and OSN\_eGFP+ cells. In SCCs,  
284 brush cells and tuft cell generation of IL25 leads to a type 2 inflammation and stimulates  
285 chemosensory cell expansion in a sequence of events that also involves cysteinyl leukotrienes  
286 (Bankova et al., 2018; Luo et al., 2019; von Moltke et al., 2016). The presence of both *IL25* and  
287 *Il17rb* suggests an autocrine effect. Furthermore, both cell types displayed increased expression  
288 of transcripts encoding for enzymes involved in eicosanoid biosynthesis such as *Alox5*, *Ptgs1*

289 and *Ptgs2* that are found in brush cells in the airways (Bankova et al., 2018) and tuft cells in the  
290 intestine (McGinty et al., 2020) where they drive type 2 immune responses.

291

292 **Acute infection with herpes simplex virus-1 (HSV-1) elicits a decrease in the fraction of**

293 **OSNs.** HSV-1 infects the olfactory epithelium in mice (Shivkumar et al., 2013). We found that

294 acute (5 DPI) high titer ( $1 \times 10^6$  PFU/naris; McKrae strain) intranasal infection with HSV-1

295 elicited a decrease in the fraction of OSN\_eGFP<sup>-</sup> and OSN\_eGFP<sup>+</sup> cells (Figure 7). GLM

296 analysis yielded significant effects for the fraction of OSN\_eGFP<sup>-</sup> compared to MVCs ( $p < 0.001$ )

297 and for the interaction between the fraction of OSN\_eGFP<sup>-</sup> compared to MVCs and HSV-1 and

298 treatment ( $p < 0.001$ , 75 observations, 69 d.f., GLM F-statistic=111 and p-value  $< 0.001$ , n=14

299 mice for control, n=11 mice for HSV-1 inoculation). Post-hoc t-test p-value was significant for

300 OSN\_eGFP<sup>-</sup> and OSN\_eGFP<sup>+</sup> cells ( $p < pFDR = 0.047$ ), but not for MVCs.

301

302

303

304

305

306 **Discussion**

307

308 We performed transcriptional profiling of three chemosensory cells in the mouse olfactory  
309 epithelium: MVC\_eGFP cells and two types of OSNs: OSN\_eGFP+ and OSN\_eGFP-. We found  
310 that while the transcriptome of each of these cell types is distinct they share common features  
311 across groups. The two groups of OSNs share transcript expression for proteins expressed in  
312 OSNs such as OMP, olfactory transduction proteins, and proteins involved in synaptic function.  
313 Yet, they differ in olfactory receptor expression and OSN\_eGFP+ express taste transduction  
314 transcripts and other transcripts found in SCCs such as *Il25* and *Pou2f3*. On the other hand,  
315 MVC\_eGFP cells express transcripts encoding for taste transduction proteins and other  
316 transcripts found in SCCs such as *Pou2f3* but they do not express transcripts for proteins  
317 involved in olfactory transduction and synaptic function, and they do not express olfactory  
318 receptors. Finally, we found that MVC\_eGFP cells and OSN\_eGFP+ cells express a substantial  
319 number of transcripts involved in viral infection, inflammation and immunity.

320

321 Here we find that OSN\_eGFP+ are OSNs expressing full-length TRPM5 in the adult mouse  
322 (Figure 3). This raises the question why our results differ from Pyrski and co-workers who did  
323 not find full-length TRPM5 in OSNs (Pyrski et al., 2017). Likely, this is due to differences in  
324 environmental conditions that alter the number of OSNs expressing TRPM5 in the adult mouse  
325 (Figure 2). Interestingly, consistent with our finding of TRPM5 expression in OSNs, analysis of  
326 scRNA data in the literature indicates that there are 8 OSNs expressing TRPM5 among 3209  
327 OSNs in the data set from Ziegler and co-workers (Ziegler et al., 2020) and 3 OSNs expressing  
328 TRPM5 among 2113 OSNs in the data set from Wu and co-workers (Wu et al., 2018). Finally,  
329 OSN\_eGFP+ express low levels of the activity-dependent transcript *s100a5* (Fischl et al., 2014)

330 (Figure 4a) suggesting that these cells express olfactory receptors that are not stimulated by  
331 odorants present in the cage.  
332  
333 Gene ontology analysis revealed that MVC\_eGFP cells (and OSN\_eGFP+ cells to a lesser  
334 extent) are enriched in viral-related transcripts compared to OSN\_eGFP- (Figures 4e, 5c,d, and  
335 Figure 6 – figure supplements 1-3). To infect cells, viruses must interact with host cell  
336 membranes to trigger membrane fusion and viral entry. Membrane proteins at the surface of the  
337 host cell are thus key elements promoting or preventing viral infection. Here we find that  
338 transcripts for several membrane proteins and cell adhesion molecules involved in viral entry are  
339 enriched in MVC\_eGFP cells. *Plscr1* encodes a phospholipid scramblase which has been shown  
340 to promote herpes simplex virus (HSV) entry in human cervical or vaginal epithelial cells and  
341 keratinocytes (Cheshenko et al., 2018), and hepatitis C virus entry into hepatocytes (Gong et al.,  
342 2011). In contrast with its role in viral entry, PLSCR1 impairs the replication of other types of  
343 viruses in infected cells (influenza A virus (Luo et al., 2018), hepatitis B virus (Yang et al.,  
344 2012)). IFTM2 is another transmembrane protein that mediates viral entry. In contrast with  
345 PLSCR1, IFTM2 inhibits viral entry of human immunodeficiency virus (HIV, (Yu et al., 2015)),  
346 hepatitis C virus (Narayana et al., 2015), influenza A H1N1 virus, West Nile virus, and dengue  
347 virus (Brass et al., 2009). IFTM2 also inhibits viral replication (Brass et al., 2009) and protein  
348 synthesis (Lee et al., 2018). Nectins are transmembrane glycoproteins and constitute cell surface  
349 receptors for numerous viruses. There is wide evidence that HSV can enter host cells through  
350 Nectin-1 dependent mechanisms, particularly for neuronal entry (Kopp et al., 2009; Petermann et  
351 al., 2015; Sayers and Elliott, 2016; Shukla et al., 2012), and Nectin-4 appears essential for  
352 measles virus epithelial entry (Noyce and Richardson, 2012; Singh et al., 2015; Singh et al.,

353 2016). In addition to cell surface molecules, the mucus contains secreted proteins that confer  
354 protection against viruses to the underlying cells. Glycoproteins are major constituents of mucus  
355 and exhibit multiple pathogens binding-sites. We found the *Ltf* transcript in MVC\_eGFP cells,  
356 which encodes for lactotransferrin. Lactotransferrin is a globular glycoprotein widely represented  
357 in the nasal mucus with anti-viral activity against Epstein-Barr virus (Zheng et al., 2014; Zheng  
358 et al., 2012), HSV (Shestakov et al., 2012; Valimaa et al., 2009)) and Hepatitis C virus (Allaire et  
359 al., 2015).

360

361 Viruses have developed numerous strategies to overcome barrier mechanisms to enter the cells.

362 After viral entry infected cells have other resources to fight against viral infection by disrupting

363 the production of new viral particles, limiting inflammation processes and activating innate

364 immune responses. For example, TRIM25 is an ubiquitin ligase that activates retinoic acid-

365 inducible gene I (RIG-I) to promote the antiviral interferon response (Gack et al., 2007).

366 Furthermore, influenza A virus targets TRIM25 to evade recognition by the host cell (Gack et al.,

367 2009). In addition, TRIM25 displays a nuclear role in restricting influenza A virus replication

368 (Meyerson et al., 2017). *Zc3h12a*, also known as MCP1P-1, inhibits hepatitis B and C virus

369 replication, reduces virus-induced inflammation (Li et al., 2020; Lin et al., 2014), and exerts

370 antiviral effects against influenza A virus (Dong et al., 2017). Finally, *Pou2f3* also called *Sknl1a*,

371 encodes for a key regulator for the generation of TRPM5-expressing cells in various epithelial

372 tissues (Yamashita et al., 2017). *Pou2f3* transcript was increased in MVC\_eGFP cells (and to a

373 lesser extent in OSN\_eGFP+) compared to OSN\_eGFP-. *Sknl1a/Pou2f3*-deficient mice lack

374 intestinal tuft cells and have defective mucosal type 2 responses to helminth infection in the

375 intestine (Gerbe et al., 2016). Finally, both OSN\_eGFP+ and MVC\_eGFP cells express Il25, an

376 interleukin that is involved in the inflammatory response of TRPM5-expressing epithelial cells in  
377 the airway epithelium and the gut (O'Leary et al., 2019), and in the skin IL25 expression leads to  
378 disruption of the epithelium and enhances HSV-1 and vaccinia virus replication (Kim et al.,  
379 2013).

380

381 Our findings of expression of virally relevant transcripts in MVC\_eGFP cells complement  
382 published studies on the role of MVC-related SCCs in viral infection. In the trachea, viral-  
383 associated formyl peptides activate SCCs to release acetylcholine and activate mucociliary  
384 clearance by ciliated cells (Perniss et al., 2020). This activation is mediated by the TRPM5  
385 transduction pathway in the SCC and muscarinic acetylcholine receptors in the ciliated cell. In a  
386 similar manner in the olfactory epithelium MVCs respond to ATP, which is involved in  
387 activating mucociliary movement by releasing acetylcholine and activating adjacent  
388 sustentacular cells through a muscarinic receptor (Fu et al., 2018). Therefore, viral infection  
389 could result in activation of MVCs resulting in activation of mucociliary clearance by adjacent  
390 sustentacular cells. In addition, in the anterior olfactory epithelium, where there is a higher  
391 density of MVCs, mice exposed to mild odorous irritants exhibited a time-dependent increase in  
392 apoptosis and a loss of mature OSNs without a significant increase in proliferation or  
393 neurogenesis (Lemons et al., 2020). This MVC-induced apoptosis could contribute to the  
394 decrease in the fraction of OSNs elicited by intranasal inoculation of HSV-1 (Figure 7). Future  
395 experiments are necessary to determine whether activation of MVCs by viruses could lead to loss  
396 of mature OSNs contributing to smell loss after viral infection. We did not find changes in MVC  
397 cell number after acute infection with HSV-1 (Figure 7c,iii). Interestingly, in the mouse distal  
398 lung, where there is no expression of SCCs, there was de novo generation of SCCs after infection

399 with A/H1N1/PR/8 influenza virus (Rane et al., 2019) raising the question whether longer virus  
400 exposure could alter MVC number in the olfactory epithelium. Finally, because we find high  
401 expression of transcripts involved in Type 2 immune response in MVCs viral activation of these  
402 cells could result in activation of cytokine-induced inflammation by long-term horizontal basal  
403 cells that activate type 1 immune responses within the olfactory epithelium (Chen et al., 2019).

404

405 The olfactory epithelium provides direct viral access to the brain through the olfactory nerve.  
406 Whether this olfactory path constitutes route of entry for viruses to the brain is a matter of  
407 intense discussion, especially because some viruses are postulated to be involved in  
408 encephalopathy and neurodegenerative disorders (Dando et al., 2014; Doty, 2008). Our findings  
409 that these TRPM5-bearing OSN\_eGFP+ cells are enriched in virally-related genes suggests that  
410 these cells may be involved in or prevention of viral entry into the brain (and these two  
411 alternatives are not exclusive since they may be different for different viruses). On the one hand,  
412 we identified transcripts encoding for viral receptors in OSN\_eGFP+ cells, suggesting that  
413 viruses can enter these OSNs. If viral particles were to enter the OSNs they could reach the  
414 olfactory bulb through anterograde transport along the olfactory nerve and from the olfactory  
415 bulb, viruses can spread throughout the brain along the olfactory bulb-hippocampus route. On  
416 the other hand, we found enrichment for transcripts encoding for proteins involved in limiting  
417 viral infection and promoting immune and anti-inflammatory responses in OSNs\_eGFP+ and  
418 MVC\_eGFP cells. In this case, viral spread to the brain would be prevented. Finally, the  
419 olfactory epithelium is innervated by the trigeminal nerve, and substance P immunostaining is  
420 closely associated with subsets of MVCs (Lin et al., 2008). This raises the question whether an  
421 interaction between MVCs and trigeminal nerve fibers could participate in local inflammation as



422 found for SCCs (Saunders et al., 2014), and could modulate the entry of virus to the brain stem  
423 through the trigeminal nerve. Future experiments are necessary to study the potential role of  
424 MVC\_eGFP cells and OSNs\_eGFP+ in viral infection of the olfactory epithelium and the brain.

425

426 Recently, due to the current COVID-19 pandemic, researchers have focused their attention on  
427 investigating SARS-CoV-2 mechanism of entry into cells. SARS-CoV-2 targets mainly cells of  
428 the respiratory pathway where viral entry is mediated by ACE2 and TMPRSS2 (Hoffmann et al.,  
429 2020). Because numerous patients reported loss of smell (Giacomelli et al., 2020; Parma et al.,  
430 2020; Yan et al., 2020a; Yan et al., 2020b), researchers wondered about the mechanism for  
431 SARS-CoV-2 infection of the olfactory epithelium. In our study, we found the *Tmprss2*  
432 transcript was significantly increased in MVC\_eGFP cells and OSN\_eGFP+ compared to  
433 OSN\_eGFP- (Figure 6). We did not find *Ace2* enrichment in these cells, but this may be due to  
434 inefficiency in finding with RNAseq low abundance transcripts like *Ace2* (Ziegler et al., 2020).  
435 Transcriptional profiling of single cells in the olfactory epithelium from other laboratories found  
436 expression of transcripts for both *Tmprss2* and *Ace2* in sustentacular cells and stem cells, and  
437 at lower levels in MVCs (Brann et al., 2020; Fodouliau et al., 2020). Viral infection of  
438 sustentacular cells may explain loss of smell because these cells play a key role in supporting  
439 olfactory function by providing glucose for the energy necessary for olfactory transduction in the  
440 OSN cilia (Villar et al., 2017). Importantly, type I interferons, and to a lesser extent type II  
441 interferons induced by response of the host to SARS-CoV-2, and infection by other viruses  
442 inducing the interferon pathway increases *Ace2* expression in the nasal epithelium (Ziegler et al.,  
443 2020). MVCs may play a role in SARS-CoV-2 infection of the olfactory epithelium because  
444 these cells may participate in activating inflammation of the epithelium that elicits type 1

445 immune response (Chen et al., 2019). Finally, our finding of transcripts involved in viral entry,  
446 replication and defense in a subset of OSNs raises the question whether viruses enter the central  
447 nervous system through the olfactory nerve (Bilinska et al., 2020). This is relevant to the  
448 potential long term effect of SARS-CoV-2 and other viruses in neurological and  
449 neurodegenerative disorders (De Felice et al., 2020). Our study provides new insights into a  
450 potential role for TRPM5-expressing cells in viral infection of the main olfactory epithelium.

451

## 452 **Conclusion**

453 Here we compared the transcriptome of OSNs that do not express TRPM5 (OSN\_eGFP-) to a  
454 small fraction of cells that express TRPM5 (MVC\_eGFP cells and OSN\_eGFP+ cells) in the  
455 olfactory epithelium. We find that transcript expression in these three types of cells is distinct.  
456 OSN\_eGFP- and OSN\_eGFP+ cells share transcripts expressed in OSNs, while OSN\_eGFP+  
457 and MVCs share expression of transcripts found in SCCs and brush cells in the airways and tuft  
458 cells of the intestine. Interestingly, OSN\_eGFP+ and MVCs express transcriptomes within the  
459 gene ontology transcript groups for immunology, inflammation and viral infection.

460

461 **Abbreviations**

462 **COVID-19:** Coronavirus disease 2019

463 **DPI:** Days post infection

464 **eGFP:** Enhanced green fluorescent protein

465 **FACS:** Fluorescence-activated cell sorting

466 **FDR:** False discovery rate

467 **GLM:** Generalized linear model

468 **GO:** Gene ontology

469 **MVCs:** Microvillous cells

470 **OMP:** Olfactory marker protein

471 **OSNs:** Olfactory sensory neurons

472 **PSF:** Point spread function

473 **SARS-CoV-2:** Severe acute respiratory syndrome coronavirus clade 2

474 **SSC:** Saline-sodium citrate

475 **SSCT:** SSC with tween

476 **TRPM5:** Transient receptor potential cation channel subfamily M member 5

477 **Methods**

478 **Key Resources Table**

| REAGENT TYPE              | REAGENT or RESOURCE                           | SOURCE                                    | IDENTIFIER       | ADDITIONAL INFORMATION                               |
|---------------------------|-----------------------------------------------|-------------------------------------------|------------------|------------------------------------------------------|
| Chemical compound, drug   | BrainPhys Neuronal Medium                     | Stemcell Technologies                     |                  | Product # 05791                                      |
| Chemical compound, drug   | Dispase II                                    | Sigma                                     |                  | Product # D4693                                      |
| Chemical compound, drug   | AcGFP1/eGFP calibration beads                 | Takara                                    |                  | Flow cytometry calibration beads<br>Product # 632594 |
| Chemical compound, drug   | mCherry calibration beads                     | Takara                                    |                  | Flow cytometry calibration beads<br>Product # 632595 |
| Chemical compound, drug   | RQ1 RNase-free DNase                          | Promega                                   |                  | Product # M6101                                      |
| Chemical compound, drug   | Papain                                        | Sigma                                     |                  | Product # P3125                                      |
| Chemical compound, drug   | Paraformaldehyde (32%)                        | Electron Microscopy Sciences              |                  | Product # 157145                                     |
| Chemical compound, drug   | RNAprotect Tissue Reagent                     | Qiagen                                    |                  | Product # 76526                                      |
| Chemical compound, drug   | RNeasy Plus Micro Kit                         | Qiagen                                    |                  | Product # 74034                                      |
| Chemical compound, drug   | High Capacity c-DNA Reverse Transcription kit | ABI                                       |                  |                                                      |
| Chemical compound, drug   | 18s rRNA                                      | PE ABI                                    |                  |                                                      |
| Strain, strain background | TRPM5-eGFP                                    | Dr. Robert Margolske (Clapp et al., 2006) |                  |                                                      |
| Strain, strain background | OMP-H2B::Cherry                               | Generated for this publication            |                  | This mouse will be deposited in Jackson Laboratories |
| Software, algorithm       | MATLAB_R2018a                                 | Mathworks                                 | RRID: SCR_001622 |                                                      |
| Software, algorithm       | Illustrator                                   | Adobe                                     | RRID: SCR_010279 |                                                      |
| Software, algorithm       | Photoshop                                     | Adobe                                     | RRID: SCR_014199 |                                                      |

|                     |                                              |                                                                                                                                                                   |                 |                      |
|---------------------|----------------------------------------------|-------------------------------------------------------------------------------------------------------------------------------------------------------------------|-----------------|----------------------|
| Software, algorithm | InDesign                                     | Adobe                                                                                                                                                             |                 |                      |
| Software, algorithm | MoFlo Astrios Summit Software (6.3.1.16945). | Beckman Coulter                                                                                                                                                   |                 |                      |
| Software, algorithm | BBMap (BBDuk)                                |                                                                                                                                                                   | RRID:SCR_016968 |                      |
| Software, algorithm | Salmon v1.2.1                                | <a href="https://combine-lab.github.io/salmon/">https://combine-lab.github.io/salmon/</a>                                                                         | RRID:SCR_017036 | (Patro et al., 2017) |
| Software, algorithm | DeSEQ2 v1.28.0                               | bioconductor.org<br><a href="https://bioconductor.org/packages/release/bioc/html/DeSeq2.html">https://bioconductor.org/packages/release/bioc/html/DeSeq2.html</a> | RRID:SCR_015687 | (Love et al., 2014)  |
| Software, algorithm | TopGO, v2.40.0                               |                                                                                                                                                                   | RRID:SCR_014798 |                      |
| Software, algorithm | pHeatmap, 1.0.12                             |                                                                                                                                                                   | RRID:SCR_016418 |                      |
| Software, algorithm | Ensembl GRCm38, v99                          |                                                                                                                                                                   |                 |                      |
| Software, algorithm | R, v4.0                                      |                                                                                                                                                                   | RRID:SCR_001905 |                      |
| Software, algorithm | Tximport, v1.16.0                            |                                                                                                                                                                   | RRID:SCR_016752 |                      |
| Software, algorithm | SAMtools                                     | SAMtools<br><a href="http://samtools.sourceforge.net/">http://samtools.sourceforge.net/</a>                                                                       | RRID:SCR_002105 | (Li et al., 2009)    |
| Software, algorithm | Bedtools                                     |                                                                                                                                                                   | RRID:SCR_006646 |                      |
| Software, algorithm | STAR v2.5.3a                                 | <a href="https://github.com/alexdobin/STAR">https://github.com/alexdobin/STAR</a>                                                                                 | RRID:SCR_015899 |                      |
| Software, algorithm | Sigmaplot, v12.5                             | Systat Software                                                                                                                                                   | RRID:SCR_003210 |                      |
| Software, algorithm | Custom code for bioinformatics analysis      | <a href="https://github.com/eric-d-larson/OE_TRPM5">https://github.com/eric-d-larson/OE_TRPM5</a>                                                                 |                 |                      |

480 **Overview of the method for transcriptional profiling of low abundance cell populations.** For  
481 transcriptional profiling of TRPM5-bearing MVC\_eGFP cells and OSN\_eGFP+ cells that  
482 constitute a small fraction of the cells in the epithelium, we used FACS to separate the cell  
483 populations targeted for RNAseq (Amamoto et al., 2019). In our experiments, we isolated the  
484 cells from mice that expressed fluorescent marker proteins appropriate for cell sorting. OSNs  
485 were expressing mCherry under the control of OMP promoter. eGFP was expressed in MVCs  
486 and a subset of OSNs (OSN\_eGFP+ cells) under control of the TRPM5 promoter.

487

488 **Generation of OMP-H2B::Cherry mice.** A PacI cassette containing PacI-H2B::mCherry-pA  
489 PGK-puro-pA-PacI was inserted into an OMP gene-targeting vector (pPM9)(Mombaerts et  
490 al., 1996), which replaces the OMP coding sequence with the PacI cassette and expresses a  
491 H2B::mCherry fusion protein. Animals are maintained in a mixed 129/B6 background.

492

493 **Animals.** Mice with TRPM5-driven eGFP expression (Clapp et al.,2006) were crossed with  
494 OMP-H2B::Cherry mice. The TRPM5-eGFP mice were obtained with written informed consent  
495 from Dr. Robert Margolskee. Both lines were maintained separately as homozygous and  
496 backcrossed regularly. Experiments were performed on mice from the F1 generation cross of  
497 TRPM5-eGFP and OMP-H2B::Cherry mice (OMP-H2B::mCherry/TRPM5-eGFP). PCR was  
498 used to verify genotype of experimental mice for eGFP and mCherry expression. Both male and  
499 female mice were used for experiments with ages ranging from 3- 8 months. Estrous and cage  
500 mate information was collected for all female mice in conjunction with experimental use. Mice  
501 were housed in passive air exchange caging under a 12:12 light/dark cycle and were given food  
502 and water *ad libitum*. Mice were housed in the National Institutes of Health approved Center for

503 Comparative Medicine at the University of Colorado Anschutz Medical Campus. All procedures  
504 were performed in compliance with University of Colorado Anschutz Medical Campus  
505 Institutional Animal Care and Use Committee (IACUC) that reviews the ethics of animal use.

506

507 **Tissue dissociation of the olfactory epithelium.** Following euthanasia via CO<sub>2</sub> inhalation, the  
508 olfactory epithelium was immediately removed from the nasal cavity and epithelial tissue was  
509 separated from the bone in the turbinates. Care was taken not to include respiratory epithelium.

510 The epithelium was dissociated enzymatically with Dispase II (2 mg/ml ) diluted in Ringer's  
511 solution ( 145mM NaCl, 5mM KCL, 20mM HEPES, 1mM MgCL<sub>2</sub>, 1mM CaCl<sub>2</sub>, 1mM Ny-  
512 Pyruvate, 5mM Glucose) (~25 minutes at 37<sup>0</sup>C) followed by an incubation in a papain plus

513 Ca/Mg<sup>++</sup> free Ringer's solution (Ca/Mg<sup>++</sup> free Ringer's: 145mM NaCl, 5mM KCL, 20mM  
514 HEPES, 1mM Ny-Pyruvate, 1mM EDTA , L-cysteine: 1mg L-cysteine /1.5mL Ca/Mg<sup>++</sup> free  
515 Ringer's, Papain:1-3ul/1mL Ca/Mg<sup>++</sup> free Ringer's), for ~40-45 minutes at 37<sup>0</sup>C. Following

516 incubation, DNase I (Promega) at 0.05U/ $\mu$ l and RNase free 10x Reaction buffer (1:20) were  
517 added to solution and the tissue was gently triturated using a ~1mm opening pipette. Isolated  
518 OSNs were collected from supernatants via centrifugation and resuspended in cell sorting

519 medium of 1x PBS (diluted from commercial 10x PBS, pH 7.4 ) and BrainPhys Neuronal  
520 Medium (Stemcell Technologies). Initially, isolated cells were examined with a confocal

521 microscope to confirm efficacy of dissociation methods, and examine cell types and

522 fluorescence. For RNAseq, cells were strained through a 40  $\mu$ m cell strainer and kept on ice until  
523 sorted via flow cytometry.

524

525 **Flow cytometry.** Fluorescence activated cell sorting was performed in the University of  
526 Colorado Cancer Center Flow Cytometry Core on a Beckman Coulter MoFlo Astrios EQ using  
527 MoFlo Astrios Summit Software (6.3.1.16945). eGFP signal was detected using a 488 nm laser  
528 and a bandpass 526/52nm collection filter. mCherry signal was detected using a 561 nm laser  
529 and a bandpass 614/20 nm collection filter. The 488nm laser was also used to detect light  
530 scatter. The threshold was set at 3%. Gating was set to exclude doublets and optimized as cell  
531 populations emerged based on fluorescent markers. Flow cytometry calibration beads for  
532 AcGFP1/eGFP and mCherry (Takara, 632594, 632595) were used as fluorescence intensity  
533 controls. Olfactory epithelium cell suspensions from wild type and OMP-H2B::Cherry mice or  
534 TRPM5-eGFP mice were sorted as controls for auto fluorescence for eGFP and mCherry  
535 populations respectively. Cells were sorted into RNprotect Tissue Reagent (Qiagen).

536

537 **RNA-extraction.** Total RNA was extracted from sorted, pooled cells from each cell population  
538 using the RNeasy Plus Micro Kit (Qiagen) according to the manufacturers recommended  
539 protocol.

540

541 **RT-qPCR.** Quantitative reverse transcription polymerase chain reaction (RT-qPCR) was used to  
542 assess and confirm identities of cell types from each of the sorted cell populations. Following  
543 total RNA extraction, RT-qPCR was performed in the PCR core at University of Colorado  
544 Anschutz Medical Campus for the following markers: OMP, TRPM5, eGFP and ChAT. Primers  
545 and probes used for eGFP, TRPM5 and OMP were described in (Oshimoto et al., 2013).  
546 Predesigned primers and probes for ChAT were purchased from Life Technologies. The mRNA  
547 for these targets was measured by RT-qPCR using ABI QuantStudio 7 flex Sequence detector.



548 1µg total RNA was used to synthesize cDNA using the High Capacity c-DNA Reverse  
549 Transcription kit (ABI-P/N 4368814). cDNA was diluted 1: 2 before PCR amplification.  
550  
551 The TaqMan probes were 5' labeled with 6-carboxyfluorescein (FAM). Real time PCR reactions  
552 were carried out in MicroAmp optical tubes (PE ABI) in a 25 µl mix containing 8 % glycerol,  
553 1X TaqMan buffer A ( 500 mM KCl, 100 mM Tris-HCl, 0.1 M EDTA, 600 nM passive  
554 reference dye ROX, pH 8.3 at room temperature), 300 µM each of dATP, dGTP, dCTP and 600  
555 µM dUTP, 5.5 mM MgCl<sub>2</sub>, 1X primer-probe mix, 1.25 U AmpliTaq Gold DNA and 5 µl  
556 template cDNA. Thermal cycling conditions were as follows: Initiation was performed at 50°C  
557 for 2 min followed by activation of TaqGold at 95°C for 10 min. Subsequently 40 cycles of  
558 amplification were performed at 95°C for 15 secs and 60°C for 1 min. Experiments were  
559 performed with duplicates for each data point. Each PCR run included the standard curve (10  
560 fold serially diluted pooled cDNA from control and experimental samples), test samples, no-  
561 template and NORT controls. The standard curve was then used to calculate the relative  
562 amounts of targets in test samples. Quantities of targets in test samples were normalized to the  
563 corresponding 18s rRNA (PE ABI, P/N 4308310).

564  
565 **RNA sequencing and pre-processing.** RNA quality control, library preparation, and sequencing  
566 were performed at the University of Colorado Genomics and Microarray core. Extracted RNA  
567 was used as the input for the Nugen Universal Plus mRNA-seq kit (Redwood City, CA) to build  
568 stranded sequencing libraries. Indexed libraries were sequenced using an Illumina  
569 NovaSEQ6000. Library preparation and sequencing was performed in two batches, separated by  
570 gender. 11 female samples were sequenced with an average depth of 37.3 million +/- SD of 6.5

571 million read pairs, and 25 male samples were sequenced with an average depth of 34.8 million  
572 +/- SD of 3.5 million read pairs. Metadata for the samples submitted are shown in Figure 4 –  
573 figure supplement 2. Raw BCL files were demultiplexed and converted to FASTQ format.  
574 Trimming, filtering, and adapter contamination removal was performed using BBduk  
575 (Bushnell).

576

577 **RNA Sequencing Analysis.** Transcript abundance was quantified from trimmed and filtered  
578 FASTQ files using Salmon v1.2.1 (Patro et al., 2017) and a customized Ensembl GRCm38  
579 (release 99) transcriptome (Zerbino et al., 2018). A customized version of the transcriptome was  
580 prepared by appending FASTA sequences of eGFP and mCherry to the GRCm38 FASTA file.  
581 The corresponding gene transfer format (GTF) file was modified accordingly to incorporate the  
582 new transcripts. Transcript abundance was summarized at the gene level using the TxImport  
583 (Soneson et al., 2015) package in R. Differential gene expression was quantified using DESeq2  
584 (Love et al., 2014) with default parameters after removing genes with an average count of < 5  
585 reads in each group. Significance was determined by FDR-adjusted p-value < 0.05. TopGO was  
586 used for gene ontology analysis (Alexa and Rahnenfuhrer, 2020). The input to TopGO was a list  
587 of significant DEGs and a list of all detected genes in the dataset. Enrichment was calculated by  
588 dividing the number of detected genes by the number of expected genes within each ontology of  
589 the TopGO output. To make the bar graphs in Figures 4 and 5, enrichment scores of  
590 downregulated GO terms were multiplied by -1 for visualization. Heatmap visualization was  
591 performed using *pHeatmap* in R (Kolde, 2019).

592

593 **TRPM5 exon coverage.** To visualize exon coverage of *Trpm5*, trimmed and filtered FASTQ  
594 files were mapped to the Ensembl GRCm38 (version 99) using STAR (params, version  
595 2.5.3a)(Dobin et al., 2013). The genome FASTA and GTF files were modified as described  
596 above. Read coverage was summarized by *Trpm5* exon using a combination of Samtools (‘depth’  
597 and ‘bedcov’)(Li et al., 2009) and Bedtools (Quinlan and Hall, 2010). Data were compared using  
598 a Scheirer-Ray-Hare test in R (*rcompanion* package).

599

600 **Tissue Preparation for Fluorescence Microscopy and *in situ*.** For euthanasia, mice were  
601 anesthetized with ketamine/xylazine (20–100  $\mu$ g/g of body weight), perfused transcardially with  
602 0.1 M phosphate buffer (PBS) followed by a PBS-buffered fixative (EMS 32%  
603 Paraformaldehyde aqueous solution diluted to 4% with 1x PBS) . The nose was harvested and  
604 postfixed for 12 h before being transferred for cryoprotection into PBS with 20% sucrose  
605 overnight. The olfactory epithelium was cryosectioned coronally into 16  $\mu$ m -thick sections  
606 mounted on Superfrost Plus slides (VWR, West Chester, PA).

607

608 ***In situ.*** *In situ* hybridization was performed with the hybridization chain reaction method (Choi  
609 et al., 2018) using HCR v3.0 Probe Sets, Amplifiers, and Buffers from Molecular Instruments,  
610 Inc. Frozen slides were allowed to thaw and dry, then immersed in 70% ethanol overnight at  
611 4°C, and allowed to dry again completely. Slides were inverted and placed on a Plexiglas  
612 platform inside a humidified chamber; subsequent steps were performed using this setup. Slides  
613 were incubated in 10  $\mu$ g/ $\mu$ l proteinase K for 10 minutes at 37°C, then pre-hybridized with HCR  
614 hybridization buffer (30% formamide buffer from Molecular Instruments) for 10 minutes at  
615 37°C. *Trpm5-B3* probes and *OMP-B2* probes (0.4 pmol of each probe in 100  $\mu$ l HCR

616 hybridization buffer per slide) were added, and slides were hybridized overnight at 37°C. Slides  
617 were briefly incubated in undiluted HCR Wash Buffer (30% formamide buffer from Molecular  
618 Instruments) at 37°C. Excess probes were removed by incubating slides for 15 minutes each at  
619 37°C in solutions of 75% HCR Wash Buffer / 25% SSCT (5X SSC, 0.1% Tween, diluted in  
620 RNase free water), 50% Buffer / 50% SSCT, 25% Buffer / 75% SSCT, and 100% SSCT. Slides  
621 were incubated in Amplification Buffer (Molecular Instruments) at room temperature for 30  
622 minutes. B3 hairpins labeled with Alexa Fluor 647 and B2 hairpins labeled with Alexa Fluor 546  
623 were prepared (6 pmol of each hairpin were heat shocked, then cooled for 30 minutes, and added  
624 to 100µl of Amplification Buffer) added to slides, and incubated overnight at room temperature.  
625 Excess hairpins were removed with three washes in SSCT at room temperature. Tissue was  
626 counterstained with DAPI, and slides were mounted using Invitrogen SlowFade Diamond  
627 Antifade Mountant (Thermo Fisher Scientific).

628

629 **Fluorescence microscopy.** Microscopy was performed with confocal microscopes (Nikon A1R  
630 or 3i Marianas). Images shown are flattened Z stacks. In situ images in Figure 3 were  
631 deconvolved in DeconvolutionLab 2 (Sage et al., 2017) using 10 rounds of Lucy-Richardson  
632 deconvolution (Lucy, 1974; Richardson, 1972) and a theoretical point spread function (PSF).  
633 The theoretical PSF was calculated using the Gibson-Lanni model (Gibson and Lanni, 1989) for  
634 325 nm lateral and 800 nm axial pixel size, wavelength of the reporter dye molecule, and an air-  
635 immersion 20X NA 0.75 objective. Image was maximum projected and Gamma of 0.8 applied to  
636 the TRMP5 channel for viewing.

637

638 **Viral stocks.** HSV-1, McKrae strain (gift from Dr. David Bloom, University of Florida), was  
639 used for all experiments. Viral stocks were prepared in Vero cells; infectious particles were  
640 purified from the supernatant, aliquoted, and stored at -80C. Viral titers were determined via  
641 plaque forming unit-(PFU) assays.

642

643 **Viral infection.** 3-6 month old OMP-H2B::mCherry/TRPM5-eGFP mice were lightly  
644 anesthetized with isoflurane and inoculated intranasally with 10  $\mu$ L of solution per naris (20  $\mu$ L  
645 total). The solution contained either HSV-1 ( $1 \times 10^6$  PFU/naris; McKrae strain), or PBS (7.4 pH)  
646 (sham control). Mice were randomly assigned to these groups. Mice were sacrificed at 5 days  
647 post-infection (5 DPI). Controls included sham-treated mice (5), mice that were lightly  
648 anesthetized (3), untreated mice housed in the BSL-2 facility (3) or the regular room (3). All  
649 controls were used because ranksum tests corrected for multiple comparisons did not find  
650 differences between these groups.

651

652 **Statistical analysis.** Statistical analysis was performed in Matlab (Mathworks, USA). Statistical  
653 significance was estimated using a generalized linear model (GLM), with post-hoc tests for all  
654 data pairs corrected for multiple comparisons using false discovery rate (Curran-Everett, 2000).  
655 The post hoc comparisons between pairs of data were performed either with a t-test, or a ranksum  
656 test, depending on the result of an Anderson-Darling test of normality. 95% CIs shown in the  
657 figures as vertical black lines or shading bounding the lines were estimated by bootstrap analysis  
658 of the mean by sampling with replacement 1000 times using the bootci function in MATLAB.

659

660

661

662 **Declarations**

663

664 *Ethics approvals.* Mouse experiments were carried out under guidelines of the National  
665 Institutes of Health in compliance with University of Colorado Anschutz Medical Campus  
666 Institutional Animal Care and Use Committee (IACUC).

667

668 *Consent for publication.* Not applicable.

669

670 *Availability of data and materials.* All data sequencing data are available in NCBI SRA  
671 <https://www.ncbi.nlm.nih.gov/sra/PRJNA632936>. The code used for bioinformatics analysis is  
672 found in [https://github.com/eric-d-larson/OE\\_TRPM5](https://github.com/eric-d-larson/OE_TRPM5)

673

674 *Competing interests.* The authors declare no competing interests.

675

676 *Funding.* This work was supported by NIDCD DC014253 and NIA DC014253-04S1 (DR) and  
677 by the RNA Bioscience Initiative of the University of Colorado Anschutz Medical Campus (DS  
678 and DR). A Starr Stem Cell Grant (JA, AKH and PF) supported the production and  
679 characterization of the OMP-H2B::mCherry mouse strain. The funding bodies had no role in the  
680 experimental design or collection, analysis and interpretation of data or in writing the  
681 manuscript.

682

683 **Authors' contributions.** D.R., B.D.B., M.N. and V.R. conceptualized the project. B.D.B.  
684 performed FACS, qPCR and RNAseq experiments. E.D.L. performed genomic analysis. P.F.

685 generated the OMP-H2B::Cherry mice. D.S. designed and analyzed in situ experiments. M.N.,  
686 A.N.B. and C.N. designed the HSV-1 inoculation experiments. C.N. and J.H.Jr. performed the  
687 viral inoculation. M.L. performed literature search and wrote the section on viral infection in the  
688 discussion. All authors contributed to writing and editing the manuscript.

689

690 ***Acknowledgements:*** We would like to acknowledge the support of Nicole Arevalo for laboratory  
691 support, Jerome Artus and Anna-Katerina Hadjantonakis for the construction of the targeting  
692 vector and production of OMP-H2B::Cherry mice.

693

694 ***Declaration of interests:*** The authors declare no competing interests.

695

696 **References**

697 Alexa, A., and Rahnenfuhrer, J. (2020). topGO: Enrichment Analysis for Gene Ontology (R  
698 Package).

699 Allaire, A., Picard-Jean, F., and Bisaillon, M. (2015). Immunofluorescence to Monitor the  
700 Cellular Uptake of Human Lactoferrin and its Associated Antiviral Activity Against the Hepatitis  
701 C Virus. *J Vis Exp*.

702 Amamoto, R., Garcia, M.D., West, E.R., Choi, J., Lapan, S.W., Lane, E.A., Perrimon, N., and  
703 Cepko, C.L. (2019). Probe-Seq enables transcriptional profiling of specific cell types from  
704 heterogeneous tissue by RNA-based isolation. *Elife* 8.

705 Bankova, L.G., Dwyer, D.F., Yoshimoto, E., Ualiyeva, S., McGinty, J.W., Raff, H., von Moltke,  
706 J., Kanaoka, Y., Frank Austen, K., and Barrett, N.A. (2018). The cysteinyl leukotriene 3 receptor  
707 regulates expansion of IL-25-producing airway brush cells leading to type 2 inflammation. *Sci*  
708 *Immunol* 3.

709 Bilinska, K., Jakubowska, P., Von Bartheld, C.S., and Butowt, R. (2020). Expression of the  
710 SARS-CoV-2 Entry Proteins, ACE2 and TMPRSS2, in Cells of the Olfactory Epithelium:  
711 Identification of Cell Types and Trends with Age. *ACS Chemical Neuroscience*.

712 Brann, D.H., Tsukahara, T., Weinreb, C., Lipovsek, M., Van den Berge, K., Gong, B., Chance,  
713 R., Macaulay, I.C., Chou, H.-j., Fletcher, R., *et al.* (2020). Non-neuronal expression of SARS-



714 CoV-2 entry genes in the olfactory system suggests mechanisms underlying COVID-19-  
715 associated anosmia. *bioRxiv*, 2020.2003.2025.009084.

716 Brass, A.L., Huang, I.C., Benita, Y., John, S.P., Krishnan, M.N., Feeley, E.M., Ryan, B.J.,  
717 Weyer, J.L., van der Weyden, L., Fikrig, E., *et al.* (2009). The IFITM proteins mediate cellular  
718 resistance to influenza A H1N1 virus, West Nile virus, and dengue virus. *Cell* *139*, 1243-1254.

719 Bushnell, B. BBMap (SourceForge).

720 Chen, M., Reed, R.R., and Lane, A.P. (2019). Chronic Inflammation Directs an Olfactory Stem  
721 Cell Functional Switch from Neuroregeneration to Immune Defense. *Cell Stem Cell* *25*, 501-513  
722 e505.

723 Cheshenko, N., Pierce, C., and Herold, B.C. (2018). Herpes simplex viruses activate  
724 phospholipid scramblase to redistribute phosphatidylserines and Akt to the outer leaflet of the  
725 plasma membrane and promote viral entry. *PLoS Pathog* *14*, e1006766.

726 Choi, H.M., Schwarzkopf, M., Fornace, M.E., Acharya, A., Artavanis, G., Stegmaier, J., Cunha,  
727 A., and Pierce, N.A. (2018). Third-generation in situ hybridization chain reaction: multiplexed,  
728 quantitative, sensitive, versatile, robust. *Development* *145*, dev165753.

729 Chuang, Y.C., Lee, C.H., Sun, W.H., and Chen, C.C. (2018). Involvement of advillin in  
730 somatosensory neuron subtype-specific axon regeneration and neuropathic pain. *Proc Natl Acad*  
731 *Sci U S A* *115*, E8557-E8566.

732 Clapp, T.R., Medler, K.F., Damak, S., Margolskee, R.F., and Kinnamon, S.C. (2006). Mouse  
733 taste cells with G protein-coupled taste receptors lack voltage-gated calcium channels and  
734 SNAP-25. *BMC Biol* 4, 7.

735 Curran-Everett, D. (2000). Multiple comparisons: philosophies and illustrations. *AmJPhysiol*  
736 *RegulIntegrComp Physiol* 279, R1-R8.

737 Damak, S., Rong, M., Yasumatsu, K., Kokrashvili, Z., Varadarajan, V., Zou, S., Jiang, P.,  
738 Ninomiya, Y., and Margolskee, R.F. (2003). Detection of sweet and umami taste in the absence  
739 of taste receptor T1r3. *Science* 301, 850-853.

740 Dando, S.J., Mackay-Sim, A., Norton, R., Currie, B.J., St John, J.A., Ekberg, J.A.K., Batzloff,  
741 M., Ulett, G.C., and Beacham, I.R. (2014). Pathogens Penetrating the Central Nervous System:  
742 Infection Pathways and the Cellular and Molecular Mechanisms of Invasion. *Clinical*  
743 *Microbiology Reviews* 27, 691-726.

744 De Felice, F.G., Tovar-Moll, F., Moll, J., Munoz, D.P., and Ferreira, S.T. (2020). Severe Acute  
745 Respiratory Syndrome Coronavirus 2 (SARS-CoV-2) and the Central Nervous System. *Trends in*  
746 *Neurosciences*.

747 Dobin, A., Davis, C.A., Schlesinger, F., Drenkow, J., Zaleski, C., Jha, S., Batut, P., Chaisson,  
748 M., and Gingeras, T.R. (2013). STAR: ultrafast universal RNA-seq aligner. *Bioinformatics* 29,  
749 15-21.

- 750 Dong, C., Sun, X., Guan, Z., Zhang, M., and Duan, M. (2017). Modulation of influenza A virus  
751 replication by microRNA-9 through targeting MCPIP1. *J Med Virol* 89, 41-48.
- 752 Doty, R.L. (2008). The olfactory vector hypothesis of neurodegenerative disease: is it viable?  
753 *Ann Neurol* 63, 7-15.
- 754 Farbman, A.I., and Margolis, F.L. (1980). Olfactory marker protein during ontogeny:  
755 immunohistochemical localization. *Developmental biology* 74, 205-215.
- 756 Fischl, A.M., Heron, P.M., Stromberg, A.J., and McClintock, T.S. (2014). Activity-dependent  
757 genes in mouse olfactory sensory neurons. *Chem Senses* 39, 439-449.
- 758 Fodoulian, L., Tuberosa, J., Rossier, D., Landis, B.N., Carleton, A., and Rodriguez, I. (2020).  
759 SARS-CoV-2 receptor and entry genes are expressed by sustentacular cells in the human  
760 olfactory neuroepithelium. *bioRxiv*, 2020.2003.2031.013268.
- 761 Fu, Z., Ogura, T., Luo, W., and Lin, W. (2018). ATP and Odor Mixture Activate TRPM5-  
762 Expressing Microvillous Cells and Potentially Induce Acetylcholine Release to Enhance  
763 Supporting Cell Endocytosis in Mouse Main Olfactory Epithelium. *Front Cell Neurosci* 12, 71.
- 764 Gack, M.U., Albrecht, R.A., Urano, T., Inn, K.S., Huang, I.C., Carnero, E., Farzan, M., Inoue,  
765 S., Jung, J.U., and Garcia-Sastre, A. (2009). Influenza A virus NS1 targets the ubiquitin ligase  
766 TRIM25 to evade recognition by the host viral RNA sensor RIG-I. *Cell Host Microbe* 5, 439-  
767 449.

- 768 Gack, M.U., Shin, Y.C., Joo, C.H., Urano, T., Liang, C., Sun, L., Takeuchi, O., Akira, S., Chen,  
769 Z., Inoue, S., *et al.* (2007). TRIM25 RING-finger E3 ubiquitin ligase is essential for RIG-I-  
770 mediated antiviral activity. *Nature* 446, 916-920.
- 771 Genovese, F., and Tizzano, M. (2018). Microvillous cells in the olfactory epithelium express  
772 elements of the solitary chemosensory cell transduction signaling cascade. *PLoS One* 13,  
773 e0202754.
- 774 Gerbe, F., Sidot, E., Smyth, D.J., Ohmoto, M., Matsumoto, I., Dardalhon, V., Cesses, P.,  
775 Garnier, L., Pouzolles, M., Brulin, B., *et al.* (2016). Intestinal epithelial tuft cells initiate type 2  
776 mucosal immunity to helminth parasites. *Nature* 529, 226-230.
- 777 Giacomelli, A., Pezzati, L., Conti, F., Bernacchia, D., Siano, M., Oreni, L., Rusconi, S.,  
778 Gervasoni, C., Ridolfo, A.L., Rizzardini, G., *et al.* (2020). Self-reported olfactory and taste  
779 disorders in SARS-CoV-2 patients: a cross-sectional study. *Clin Infect Dis*.
- 780 Gibson, S.F., and Lanni, F. (1989). Diffraction by a circular aperture as a model for three-  
781 dimensional optical microscopy. *J Opt Soc Am A* 6, 1357-1367.
- 782 Gong, Q., Cheng, M., Chen, H., Liu, X., Si, Y., Yang, Y., Yuan, Y., Jin, C., Yang, W., He, F., *et*  
783 *al.* (2011). Phospholipid scramblase 1 mediates hepatitis C virus entry into host cells. *FEBS Lett*  
784 585, 2647-2652.

785 Hegg, C.C., Jia, C., Chick, W.S., Restrepo, D., and Hansen, A. (2010). Microvillous cells  
786 expressing IP3 receptor type 3 in the olfactory epithelium of mice. *Eur J Neurosci* 32, 1632-  
787 1645.

788 Hoffmann, M., Kleine-Weber, H., Schroeder, S., Kruger, N., Herrler, T., Erichsen, S.,  
789 Schiergens, T.S., Herrler, G., Wu, N.H., Nitsche, A., *et al.* (2020). SARS-CoV-2 Cell Entry  
790 Depends on ACE2 and TMPRSS2 and Is Blocked by a Clinically Proven Protease Inhibitor. *Cell*  
791 181, 271-280 e278.

792 Jablonka-Shariff, A., Lu, C.Y., Campbell, K., Monk, K.R., and Snyder-Warwick, A.K. (2020).  
793 Gpr126/Adgrg6 contributes to the terminal Schwann cell response at the neuromuscular junction  
794 following peripheral nerve injury. *Glia* 68, 1182-1200.

795 Juilfs, D.M., Fulle, H.J., Zhao, A.Z., Houslay, M.D., Garbers, D.L., and Beavo, J.A. (1997). A  
796 subset of olfactory neurons that selectively express cGMP-stimulated phosphodiesterase (PDE2)  
797 and guanylyl cyclase-D define a unique olfactory signal transduction pathway. *Proc Natl Acad*  
798 *Sci U S A* 94, 3388-3395.

799 Kim, B.E., Bin, L., Ye, Y.M., Ramamoorthy, P., and Leung, D.Y.M. (2013). IL-25 enhances  
800 HSV-1 replication by inhibiting filaggrin expression, and acts synergistically with Th2 cytokines  
801 to enhance HSV-1 replication. *J Invest Dermatol* 133, 2678-2685.

802 Kolde, R. (2019). pheatmap: Pretty Heatmaps ([cran.r-project.org](http://cran.r-project.org)).

- 803 Kopp, S.J., Banisadr, G., Glajch, K., Maurer, U.E., Grunewald, K., Miller, R.J., Osten, P., and  
804 Spear, P.G. (2009). Infection of neurons and encephalitis after intracranial inoculation of herpes  
805 simplex virus requires the entry receptor nectin-1. *Proc Natl Acad Sci U S A* *106*, 17916-17920.
- 806 Lee, W.J., Fu, R.M., Liang, C., and Sloan, R.D. (2018). IFITM proteins inhibit HIV-1 protein  
807 synthesis. *Sci Rep* *8*, 14551.
- 808 Lemons, K., Fu, Z., Aoude, I., Ogura, T., Sun, J., Chang, J., Mbonu, K., Matsumoto, I.,  
809 Arakawa, H., and Lin, W. (2017). Lack of TRPM5-Expressing Microvillous Cells in Mouse  
810 Main Olfactory Epithelium Leads to Impaired Odor-Evoked Responses and Olfactory-Guided  
811 Behavior in a Challenging Chemical Environment. *eNeuro* *4*.
- 812 Lemons, K., Fu, Z., Ogura, T., and Lin, W. (2020). TRPM5-expressing Microvillous Cells  
813 Regulate Region-specific Cell Proliferation and Apoptosis During Chemical Exposure.  
814 *Neuroscience* *434*, 171-190.
- 815 Li, H., Handsaker, B., Wysoker, A., Fennell, T., Ruan, J., Homer, N., Marth, G., Abecasis, G.,  
816 Durbin, R., and Genome Project Data Processing, S. (2009). The Sequence Alignment/Map  
817 format and SAMtools. *Bioinformatics* *25*, 2078-2079.
- 818 Li, M., Yang, J., Zhao, Y., Song, Y., Yin, S., Guo, J., Zhang, H., Wang, K., Wei, L., Li, S., *et al.*  
819 (2020). MCP1 inhibits Hepatitis B virus replication by destabilizing viral RNA and negatively  
820 regulates the virus-induced innate inflammatory responses. *Antiviral Res* *174*, 104705.

821 Liberles, S.D. (2015). Trace amine-associated receptors: ligands, neural circuits, and behaviors.  
822 *Current opinion in neurobiology* 34, 1-7.

823 Lin, R.J., Chu, J.S., Chien, H.L., Tseng, C.H., Ko, P.C., Mei, Y.Y., Tang, W.C., Kao, Y.T.,  
824 Cheng, H.Y., Liang, Y.C., *et al.* (2014). MCP1P1 suppresses hepatitis C virus replication and  
825 negatively regulates virus-induced proinflammatory cytokine responses. *J Immunol* 193, 4159-  
826 4168.

827 Lin, W., Ezekwe, E.A., Jr., Zhao, Z., Liman, E.R., and Restrepo, D. (2008). TRPM5-expressing  
828 microvillous cells in the main olfactory epithelium. *BMC Neurosci* 9, 114.

829 Lin, W., Margolskee, R., Donnert, G., Hell, S.W., and Restrepo, D. (2007). Olfactory neurons  
830 expressing transient receptor potential channel M5 (TRPM5) are involved in sensing  
831 semiochemicals. *Proc Natl Acad Sci U S A* 104, 2471-2476.

832 Lopez, F., Delgado, R., Lopez, R., Bacigalupo, J., and Restrepo, D. (2014). Transduction for  
833 Pheromones in the Main Olfactory Epithelium Is Mediated by the Ca<sup>2+</sup>-Activated Channel  
834 TRPM5. *J Neurosci* 34, 3268-3278.

835 Love, M.I., Huber, W., and Anders, S. (2014). Moderated estimation of fold change and  
836 dispersion for RNA-seq data with DESeq2. *Genome Biol* 15, 550.

837 Lucy, L.B. (1974). An iterative technique for the rectification of observed distributions. *The*  
838 *Astronomical Journal* 79, 745.

- 839 Luo, W., Zhang, J., Liang, L., Wang, G., Li, Q., Zhu, P., Zhou, Y., Li, J., Zhao, Y., Sun, N., *et al.*  
840 (2018). Phospholipid scramblase 1 interacts with influenza A virus NP, impairing its nuclear  
841 import and thereby suppressing virus replication. *PLoS Pathog* *14*, e1006851.
- 842 Luo, X.C., Chen, Z.H., Xue, J.B., Zhao, D.X., Lu, C., Li, Y.H., Li, S.M., Du, Y.W., Liu, Q.,  
843 Wang, P., *et al.* (2019). Infection by the parasitic helminth *Trichinella spiralis* activates a Tas2r-  
844 mediated signaling pathway in intestinal tuft cells. *Proc Natl Acad Sci U S A* *116*, 5564-5569.
- 845 Maina, I.W., Workman, A.D., and Cohen, N.A. (2018). The role of bitter and sweet taste  
846 receptors in upper airway innate immunity: Recent advances and future directions. *World J*  
847 *Otorhinolaryngol Head Neck Surg* *4*, 200-208.
- 848 McGinty, J.W., Ting, H.-A., Billipp, T.E., Nadsombati, M.S., Khan, D.M., Barrett, N.A., Liang,  
849 H.-E., Matsumoto, I., and von Moltke, J. (2020). Tuft-Cell-Derived Leukotrienes Drive Rapid  
850 Anti-helminth Immunity in the Small Intestine but Are Dispensable for Anti-protist Immunity.  
851 *Immunity* *52*, 528-541.e527.
- 852 McLaughlin, S.K., McKinnon, P.J., and Margolskee, R.F. (1992). Gustducin is a taste-cell-  
853 specific G protein closely related to the transducins. *Nature* *357*, 563-569.
- 854 Meyerson, N.R., Zhou, L., Guo, Y.R., Zhao, C., Tao, Y.J., Krug, R.M., and Sawyer, S.L. (2017).  
855 Nuclear TRIM25 Specifically Targets Influenza Virus Ribonucleoproteins to Block the Onset of  
856 RNA Chain Elongation. *Cell Host Microbe* *22*, 627-638 e627.



- 857 Mobley, A.S., Miller, A.M., Araneda, R.C., Maurer, L.R., Muller, F., and Greer, C.A. (2010).  
858 Hyperpolarization-activated cyclic nucleotide-gated channels in olfactory sensory neurons  
859 regulate axon extension and glomerular formation. *The Journal of neuroscience : the official*  
860 *journal of the Society for Neuroscience* *30*, 16498-16508.
- 861 Mombaerts, P., Wang, F., Dulac, C., Chao, S.K., Nemes, A., Mendelsohn, M., Edmondson, J.,  
862 and Axel, R. (1996). Visualizing an olfactory sensory map. *Cell* *87*, 675-686.
- 863 Narayana, S.K., Helbig, K.J., McCartney, E.M., Eyre, N.S., Bull, R.A., Eltahla, A., Lloyd, A.R.,  
864 and Beard, M.R. (2015). The Interferon-induced Transmembrane Proteins, IFITM1, IFITM2,  
865 and IFITM3 Inhibit Hepatitis C Virus Entry. *J Biol Chem* *290*, 25946-25959.
- 866 Noyce, R.S., and Richardson, C.D. (2012). Nectin 4 is the epithelial cell receptor for measles  
867 virus. *Trends Microbiol* *20*, 429-439.
- 868 O'Leary, C.E., Schneider, C., and Locksley, R.M. (2019). Tuft Cells-Systemically Dispersed  
869 Sensory Epithelia Integrating Immune and Neural Circuitry. *Annu Rev Immunol* *37*, 47-72.
- 870 Ogura, T., Szebenyi, S.A., Krosnowski, K., Sathyanesan, A., Jackson, J., and Lin, W. (2011).  
871 Cholinergic microvillous cells in the mouse main olfactory epithelium and effect of acetylcholine  
872 on olfactory sensory neurons and supporting cells. *J Neurophysiol* *106*, 1274-1287.
- 873 Omura, M., and Mombaerts, P. (2014). Trpc2-Expressing Sensory Neurons in the Main  
874 Olfactory Epithelium of the Mouse. *Cell Reports* *8*, 583-595.

875 Oshimoto, A., Wakabayashi, Y., Garske, A., Lopez, R., Rolen, S., Flowers, M., Arevalo, N., and  
876 Restrepo, D. (2013). Potential role of transient receptor potential channel M5 in sensing putative  
877 pheromones in mouse olfactory sensory neurons. *PLoS One* 8, e61990.

878 Parma, V., Ohla, K., Veldhuizen, M.G., Nim, M.Y., Kelly, C.E., Reed, D.R., Hummel, T.,  
879 Munger, S., and Hayes, J.E. (2020). More than just smell - COVID-19 is associated with severe  
880 impairment of smell, taste, and chemesthesis. *medRxiv*, 2020.2005.2004.20090902.

881 Patro, R., Duggal, G., Love, M.I., Irizarry, R.A., and Kingsford, C. (2017). Salmon provides fast  
882 and bias-aware quantification of transcript expression. *Nature methods* 14, 417-419.

883 Perniss, A., Liu, S., Boonen, B., Keshavarz, M., Ruppert, A.L., Timm, T., Pfeil, U., Soultanova,  
884 A., Kusumakshi, S., Delventhal, L., *et al.* (2020). Chemosensory Cell-Derived Acetylcholine  
885 Drives Tracheal Mucociliary Clearance in Response to Virulence-Associated Formyl Peptides.  
886 *Immunity* 52, 683-699 e611.

887 Petermann, P., Rahn, E., Thier, K., Hsu, M.J., Rixon, F.J., Kopp, S.J., and Knebel-Morsdorf, D.  
888 (2015). Role of Nectin-1 and Herpesvirus Entry Mediator as Cellular Receptors for Herpes  
889 Simplex Virus 1 on Primary Murine Dermal Fibroblasts. *J Virol* 89, 9407-9416.

890 Pyrski, M., Eckstein, E., Schmid, A., Bufe, B., Weiss, J., Chubanov, V., Boehm, U., and Zufall,  
891 F. (2017). *Trpm5* expression in the olfactory epithelium. *Mol Cell Neurosci* 80, 75-88.

- 892 Pyrski, M., Tusty, M., Eckstein, E., Oboti, L., Rodriguez-Gil, D.J., Greer, C.A., and Zufall, F.  
893 (2018). P/Q Type Calcium Channel Cav2.1 Defines a Unique Subset of Glomeruli in the Mouse  
894 Olfactory Bulb. *Frontiers in Cellular Neuroscience* *12*, 295.
- 895 Quinlan, A.R., and Hall, I.M. (2010). BEDTools: a flexible suite of utilities for comparing  
896 genomic features. *Bioinformatics* *26*, 841-842.
- 897 Rane, C.K., Jackson, S.R., Pastore, C.F., Zhao, G., Weiner, A.I., Patel, N.N., Herbert, D.R.,  
898 Cohen, N.A., and Vaughan, A.E. (2019). Development of solitary chemosensory cells in the  
899 distal lung after severe influenza injury. *Am J Physiol Lung Cell Mol Physiol* *316*, L1141-  
900 L1149.
- 901 Richardson, W.H. (1972). Bayesian-Based Iterative Method of Image Restoration\*. *J Opt Soc*  
902 *Am* *62*, 55-59.
- 903 Sage, D., Donati, L., Soulez, F., Fortun, D., Schmit, G., Seitz, A., Guet, R., Vonesch, C., and  
904 Unser, M. (2017). DeconvolutionLab2: An open-source software for deconvolution microscopy.  
905 *Methods* *115*, 28-41.
- 906 Saunders, C.J., Christensen, M., Finger, T.E., and Tizzano, M. (2014). Cholinergic  
907 neurotransmission links solitary chemosensory cells to nasal inflammation. *Proc Natl Acad Sci U*  
908 *S A* *111*, 6075-6080.

- 909 Sayers, C.L., and Elliott, G. (2016). Herpes Simplex Virus 1 Enters Human Keratinocytes by a  
910 Nectin-1-Dependent, Rapid Plasma Membrane Fusion Pathway That Functions at Low  
911 Temperature. *J Virol* *90*, 10379-10389.
- 912 Sekerkova, G., Zheng, L., Loomis, P.A., Changyaleket, B., Whitlon, D.S., Mugnaini, E., and  
913 Bartles, J.R. (2004). Espins are multifunctional actin cytoskeletal regulatory proteins in the  
914 microvilli of chemosensory and mechanosensory cells. *J Neurosci* *24*, 5445-5456.
- 915 Shestakov, A., Jenssen, H., Nordstrom, I., and Eriksson, K. (2012). Lactoferricin but not  
916 lactoferrin inhibit herpes simplex virus type 2 infection in mice. *Antiviral Res* *93*, 340-345.
- 917 Shivkumar, M., Milho, R., May, J.S., Nicoll, M.P., Efstathiou, S., and Stevenson, P.G. (2013).  
918 Herpes simplex virus 1 targets the murine olfactory neuroepithelium for host entry. *J Virol* *87*,  
919 10477-10488.
- 920 Shukla, N.D., Tiwari, V., and Valyi-Nagy, T. (2012). Nectin-1-specific entry of herpes simplex  
921 virus 1 is sufficient for infection of the cornea and viral spread to the trigeminal ganglia. *Mol Vis*  
922 *18*, 2711-2716.
- 923 Singh, B.K., Hornick, A.L., Krishnamurthy, S., Locke, A.C., Mendoza, C.A., Mateo, M., Miller-  
924 Hunt, C.L., Cattaneo, R., and Sinn, P.L. (2015). The Nectin-4/Afadin Protein Complex and  
925 Intercellular Membrane Pores Contribute to Rapid Spread of Measles Virus in Primary Human  
926 Airway Epithelia. *J Virol* *89*, 7089-7096.

- 927 Singh, B.K., Li, N., Mark, A.C., Mateo, M., Cattaneo, R., and Sinn, P.L. (2016). Cell-to-Cell  
928 Contact and Nectin-4 Govern Spread of Measles Virus from Primary Human Myeloid Cells to  
929 Primary Human Airway Epithelial Cells. *J Virol* *90*, 6808-6817.
- 930 Sonesson, C., Love, M.I., and Robinson, M.D. (2015). Differential analyses for RNA-seq:  
931 transcript-level estimates improve gene-level inferences. *F1000Res* *4*, 1521.
- 932 Tizzano, M., Gulbransen, B.D., Vandenbeuch, A., Clapp, T.R., Herman, J.P., Sibhatu, H.M.,  
933 Churchill, M.E., Silver, W.L., Kinnamon, S.C., and Finger, T.E. (2010). Nasal chemosensory  
934 cells use bitter taste signaling to detect irritants and bacterial signals. *Proc Natl Acad Sci U S A*  
935 *107*, 3210-3215.
- 936 Ualiyeva, S., Hallen, N., Kanaoka, Y., Ledderose, C., Matsumoto, I., Junger, W.G., Barrett,  
937 N.A., and Bankova, L.G. (2020). Airway brush cells generate cysteinyl leukotrienes through the  
938 ATP sensor P2Y2. *Science Immunology* *5*, eaax7224.
- 939 Valimaa, H., Tenovuo, J., Waris, M., and Hukkanen, V. (2009). Human lactoferrin but not  
940 lysozyme neutralizes HSV-1 and inhibits HSV-1 replication and cell-to-cell spread. *Virology* *6*, 53.
- 941 van der Linden, C., Jakob, S., Gupta, P., Dulac, C., and Santoro, S.W. (2018). Sex separation  
942 induces differences in the olfactory sensory receptor repertoires of male and female mice. *Nat*  
943 *Commun* *9*, 5081.

- 944 Villar, P.S., Delgado, R., Vergara, C., Reyes, J.G., and Bacigalupo, J. (2017). Energy  
945 Requirements of Odor Transduction in the Chemosensory Cilia of Olfactory Sensory Neurons  
946 Rely on Oxidative Phosphorylation and Glycolytic Processing of Extracellular Glucose. *J*  
947 *Neurosci* 37, 5736-5743.
- 948 von Moltke, J., Ji, M., Liang, H.E., and Locksley, R.M. (2016). Tuft-cell-derived IL-25 regulates  
949 an intestinal ILC2-epithelial response circuit. *Nature* 529, 221-225.
- 950 Wu, Y., Ma, L., Duyck, K., Long, C.C., Moran, A., Scheerer, H., Blanck, J., Peak, A., Box, A.,  
951 Perera, A., *et al.* (2018). A Population of Navigator Neurons Is Essential for Olfactory Map  
952 Formation during the Critical Period. *Neuron* 100, 1066-1082 e1066.
- 953 Yamaguchi, T., Yamashita, J., Ohmoto, M., Aoude, I., Ogura, T., Luo, W., Bachmanov, A.A.,  
954 Lin, W., Matsumoto, I., and Hirota, J. (2014). *Skn-1a/Pou2f3* is required for the generation of  
955 *Trpm5*-expressing microvillous cells in the mouse main olfactory epithelium. *BMC Neurosci* 15,  
956 13.
- 957 Yamashita, J., Ohmoto, M., Yamaguchi, T., Matsumoto, I., and Hirota, J. (2017). *Skn-1a/Pou2f3*  
958 functions as a master regulator to generate *Trpm5*-expressing chemosensory cells in mice. *PLoS*  
959 *One* 12, e0189340.
- 960 Yan, C.H., Faraji, F., Prajapati, D.P., Boone, C.E., and DeConde, A.S. (2020a). Association of  
961 chemosensory dysfunction and Covid-19 in patients presenting with influenza-like symptoms.  
962 *Int Forum Allergy Rhinol*.

- 963 Yan, C.H., Faraji, F., Prajapati, D.P., Ostrander, B.T., and DeConde, A.S. (2020b). Self-reported  
964 olfactory loss associates with outpatient clinical course in Covid-19. *Int Forum Allergy Rhinol*.
- 965 Yang, J., Zhu, X., Liu, J., Ding, X., Han, M., Hu, W., Wang, X., Zhou, Z., and Wang, S. (2012).  
966 Inhibition of Hepatitis B virus replication by phospholipid scramblase 1 in vitro and in vivo.  
967 *Antiviral Res* 94, 9-17.
- 968 Yu, J., Li, M., Wilkins, J., Ding, S., Swartz, T.H., Esposito, A.M., Zheng, Y.M., Freed, E.O.,  
969 Liang, C., Chen, B.K., *et al.* (2015). IFITM Proteins Restrict HIV-1 Infection by Antagonizing  
970 the Envelope Glycoprotein. *Cell Rep* 13, 145-156.
- 971 Zerbino, D.R., Achuthan, P., Akanni, W., Amode, M.R., Barrell, D., Bhai, J., Billis, K.,  
972 Cummins, C., Gall, A., Giron, C.G., *et al.* (2018). Ensembl 2018. *Nucleic Acids Res* 46, D754-  
973 D761.
- 974 Zhang, Y., Hoon, M.A., Chandrashekar, J., Mueller, K.L., Cook, B., Wu, D., Zuker, C.S., and  
975 Ryba, N.J. (2003). Coding of sweet, bitter, and umami tastes: different receptor cells sharing  
976 similar signaling pathways. *Cell* 112, 293-301.
- 977 Zheng, Y., Qin, Z., Ye, Q., Chen, P., Wang, Z., Yan, Q., Luo, Z., Liu, X., Zhou, Y., Xiong, W.,  
978 *et al.* (2014). Lactoferrin suppresses the Epstein-Barr virus-induced inflammatory response by  
979 interfering with pattern recognition of TLR2 and TLR9. *Lab Invest* 94, 1188-1199.

980 Zheng, Y., Zhang, W., Ye, Q., Zhou, Y., Xiong, W., He, W., Deng, M., Zhou, M., Guo, X.,  
981 Chen, P., *et al.* (2012). Inhibition of Epstein-Barr virus infection by lactoferrin. *J Innate Immun*  
982 *4*, 387-398.

983 Ziegler, C.G.K., Allon, S.J., Nyquist, S.K., Mbanjo, I.M., Miao, V.N., Tzouanas, C.N., Cao, Y.,  
984 Yousif, A.S., Bals, J., Hauser, B.M., *et al.* (2020). SARS-CoV-2 receptor ACE2 is an interferon-  
985 stimulated gene in human airway epithelial cells and is detected in specific cell subsets across  
986 tissues. *Cell*.

987



988 **Figure legends**

989

990 **Figure 1. Fluorescence activated sorting (FACS) of cells isolated from the olfactory**  
991 **epithelium.**

992 **a.** TRPM5 promoter driven expression of eGFP and OMP promoter driven expression of  
993 mCherry in the olfactory epithelium. Expression of eGFP is found both in MVCs that do not  
994 express mCherry (asterisk) and in OSNs double labeled with eGFP and mCherry (arrow). **i.**  
995 Composite, **ii.** eGFP, **iii.** mCherry, **iv.** Composite magnification. Magenta: mCherry, green:  
996 eGFP. Scale bar: i-iii, 50  $\mu$ m, iv, 10  $\mu$ m.

997 **b.** Schematic of RNA-seq process from tissue to RNA extraction. Mouse OE was dissociated  
998 into single cells and sorted via FACS. RNA was extracted from each of the resulting cell  
999 populations.

1000 **c.** Two isolated OSNs differing in eGFP expression. Magenta: mCherry, green: eGFP. Scale bar:  
1001 10  $\mu$ m.

1002 **d.** Distribution of mCherry and eGFP fluorescence intensity for FACS-sorted cells. Three cell  
1003 populations were isolated for RNAseq: Cells with low OMP promoter-driven mCherry  
1004 expression and high TRPM5 promoter-driven eGFP expression (MVC\_eGFP cells), cells with  
1005 high OMP promoter-driven mCherry and low eGFP expression (OSN\_eGFP- cells) and cells  
1006 with eGFP expression of the same magnitude as MVC\_eGFP cells and high OMP promoter-  
1007 driven mCherry expression (OSN\_eGFP+ cells). The number of cells collected for this FACS  
1008 run were: OSN\_eGFP-s 1,500,000, OSN\_eGFP+s 5336 and MVC\_eGFP cells 37,178.

1009 **e.** qPCR levels (normalized to levels 18s RNA) for expression of transcripts encoding for OMP  
1010 **(i)**, TRPM5 **(ii)**, eGFP **(iii)** and ChAT **(iv)**. The asterisks denote significant differences tested

1011 with either t-test or ranksum with p-values below the significance p-value corrected for multiple  
1012 comparisons using the false discovery rate (pFDR)(Curran-Everett, 2000). pFDR is 0.033 for  
1013 OMP, 0.05 for TRPM5, 0.05 for eGFP and 0.03 for ChAT, n=8 for OMP OSN\_eGFP-s, 4 for  
1014 OMP OSN\_eGFP+s and 4 for MVC\_eGFP cells.

1015

1016 **Figure 2. Decreased yield of OSN\_eGFP+ cells when mice are moved from low ventilation**  
1017 **(LV) to high ventilation (HV) cages.**

1018 **a and b.** Distribution of mCherry and eGFP fluorescence intensity for FACS-sorted cells that  
1019 either were not transferred to HV cages (**a**) or were transferred to HV cages for 22 days before  
1020 sorting (**b**).

1021 **c.** Time course showing change in the number of sorted OSN\_eGFP+s after mice were  
1022 transferred to HV cages.

1023 **d and e.** Dependence of the yield of OSN\_eGFP+ cells after sorting on the number of days in  
1024 LV cages (**d**) or the number of days in HV cages (**e**).

1025

1026 **Figure 3. Coverage of TRPM5 transcript by RNAseq in the different cell groups sorted**  
1027 **from the olfactory epithelium**

1028 **a.** In situ for TRPM5 and OMP transcripts in the olfactory epithelium shows strong label for  
1029 TRPM5 in MVCs (asterisks) and sparse labeling in the OSN nuclear layer (arrows). **i.** OMP, **ii.**  
1030 TRPM5, **iii.** Composite. The scale bar is 100  $\mu$ m.

1031 **b and c.** Coverage of the reads for the TRPM5 transcript for the different cell groups. Read  
1032 coverage was computed with 'Samtools depth' over the region corresponding to the Trpm5 gene.

1033 **b.** Coverage per exon. All samples normalized to TRPM5 reads show distribution among exons  
1034 with little difference between MVC and OSN\_eGFP+ cells.  
1035 **c.** Coverage shown per base pair as a function of location in the genomic DNA. Plots show read  
1036 depth per base pair for each cell type normalized to total number of mapped reads. Gray shading  
1037 indicates 95% confidence interval.

1038

1039 **Figure 4. RNAseq comparison of OSN\_eGFP- and OSN\_eGFP+ cells.**

1040 **a.** Heatmap showing the top 10 upregulated and top 10 downregulated genes identified by  
1041 DESeq2.

1042 **b.** Heatmap showing all *Olfir* genes detected in the data.

1043 For both a and b, row and column order were determined automatically by the *pHeatmap*

1044 package in R. For each data point relative expression was calculated by subtracting the average  
1045 row value from each individual value.

1046 **c.** Volcano plot of all Olfactory receptors, demonstrating the small number of enriched olfactory  
1047 receptors in the OSN\_eGFP+ population.

1048 **d.** Hierarchical clustering of transcripts for taste transduction and transcripts expressed in

1049 canonical and non-canonical OSNs identified by RNAseq as significantly different in expression

1050 between the cell groups. We compared expression of transcripts involved in taste transduction,

1051 canonical olfactory transduction, and non-canonical OSNs. The non-canonical OSNs considered

1052 here included guanylyl-cyclase D (GC-D) OSNs (Juilfs et al., 1997), Trpc2 OSNs (Omura and

1053 Mombaerts, 2014), Cav2.1 OSNs (Pyrski et al., 2018), and OSNs expressing trace amine-

1054 associated receptors (Taars) (Liberles, 2015). Transcripts identified by DESeq2.

1055 e. Gene ontology (GO) term enrichment was calculated from differentially expressed genes using  
1056 *TopGO* in R. An enrichment value for genes with Fischer p value  $<0.05$  was calculated by  
1057 dividing the number of expressed genes within the GO term by the number expected genes (by  
1058 random sampling, determined by *TopGO*).

1059

1060 **Figure 5. RNAseq comparison of OSN\_eGFP- and OSN\_eGFP+ vs. MVC\_eGFP cells.**

1061 **a and b.** Heatmaps showing hierarchical clustering of the top 10 upregulated and top 10

1062 downregulated genes identified by DESeq2. **a.** OSN\_eGFP- vs. MVC\_eGFP cells. **b.**

1063 OSN\_eGFP+ vs. MVC\_eGFP cells. For both a and b, row and column order were determined

1064 automatically by the *pHeatmap* package in R. For each data point relative expression was

1065 calculated by subtracting the average row value from each individual value.

1066 **c and d.** Gene ontology (GO) term enrichment was calculated from differentially expressed

1067 genes using *TopGO* in R. **c.** OSN\_eGFP- vs. MVC\_eGFP cells. **d.** OSN\_eGFP+ vs.

1068 MVC\_eGFP cells. An enrichment value for genes with Fischer p value  $<0.05$  was calculated by

1069 dividing the number of expressed genes within the GO term by the number expected genes (by

1070 random sampling, determined by *TopGO*).

1071

1072 **Figure 6. Significant differences in virally-related gene ontology.** Heatmaps show hierarchical

1073 clustering of significantly differentially expressed genes identified by DESeq2. **a.** MVC\_eGFP

1074 cells compared to OSN\_eGFP-. **b.** OSN\_eGFP+ compared to OSN\_eGFP-.

1075

1076 **Figure 7. Intranasal inoculation with HSV-1 elicits a decrease in OSNs.**

1077 **a and b.** Distribution of mCherry and eGFP fluorescence intensity for FAC-sorted cells that

1078 either were not infected (**a**) or were inoculated intranasally with 10  $\mu$ L of solution per naris (20

1079  $\mu$ L total with HSV-1 ( $1 \times 10^6$  PFU/naris; McKrae strain) 5 DPI (**b**).

1080 **c.** Fraction of total cells for OSN\_eGFP- (**i**), OSN\_eGFP+ (**ii**) or MVC (**iii**) cell groups. GLM

1081 analysis yielded significant effects for the fraction of OSN\_eGFP- compared to MVCs ( $p < 0.001$ )

1082 and for the interaction between the fraction of OSN\_eGFP- compared to MVCs and HSV-1

1083 treatment ( $p < 0.001$ , 75 observations, 69 d.f., GLM F-statistic=111 and  $p$ -value  $< 0.001$ ,  $n=14$

1084 mice for control,  $n=11$  mice for HSV-1 inoculation). Asterisks denote a significant difference

1085 post-hoc with t-test  $p$ -value  $< pFDR = 0.047$ .

1086

1087

| Name                | OSN_eGFP- | OSN_eGFP+ | MVC_eGFP | p-value adjusted |
|---------------------|-----------|-----------|----------|------------------|
| <i>Olfr292</i>      | 3.61      | 959       | 4.29     | 6.35E-09         |
| <i>Olfr282</i>      | 2.05      | 486       | 0        | 8.01E-05         |
| <i>Olfr1434</i>     | 53.3      | 7730      | 0        | 9.71E-16         |
| <i>Olfr390</i>      | 101       | 10800     | 43.1     | 1.56E-16         |
| <i>Olfr305</i>      | 6.14      | 612       | 0        | 6.3E-12          |
| <i>Olfr293</i>      | 6.96      | 664       | 16.9     | 1.42E-07         |
| <i>Olfr378</i>      | 3.41      | 322       | 0        | 1.1E-06          |
| <i>Olfr128</i>      | 39.6      | 3660      | 12.7     | 7.33E-14         |
| <i>Olfr344</i>      | 16.2      | 1050      | 0        | 1.4E-11          |
| <i>Olfr307</i>      | 7.59      | 393       | 0        | 3.76E-06         |
| <i>Olfr391</i>      | 156       | 8000      | 9.79     | 1.01E-15         |
| <i>Olfr299</i>      | 13.1      | 651       | 0        | 4.58E-09         |
| <i>Olfr142</i>      | 36.4      | 1720      | 3.77     | 1.62E-08         |
| <i>Olfr1</i>        | 147       | 5720      | 52.7     | 3.08E-10         |
| <i>Olfr1279</i>     | 16.4      | 552       | 10.9     | 3.52E-07         |
| <i>Olfr39</i>       | 13.8      | 388       | 21       | 2.81E-06         |
| <i>Olfr1447</i>     | 64.1      | 1610      | 0        | 1.23E-07         |
| <i>Olfr728</i>      | 2150      | 45700     | 320      | 6.13E-22         |
| <i>Olfr727</i>      | 560       | 11000     | 179      | 1.64E-07         |
| <i>Olfr1555-ps1</i> | 10.1      | 175       | 0        | 0.0397           |
| <i>Olfr346</i>      | 27.6      | 465       | 0        | 3.85E-05         |
| <i>Olfr1228</i>     | 533       | 5320      | 35.4     | 3.09E-08         |
| <i>Olfr1181</i>     | 87.4      | 766       | 4.61     | 0.000766         |
| <i>Olfr943</i>      | 97.1      | 844       | 2.89     | 0.000886         |
| <i>Olfr298</i>      | 60.1      | 509       | 0        | 0.00132          |

1088

1089 **Table 1. Levels of expression and adjusted p-value for the olfactory receptor genes whose**

1090 **levels are significantly higher in OSN\_eGFP+ compared to OSN\_eGFP-. These olfactory**

1091 **receptors had an adjusted p-value for expression level difference between OSN\_eGFP+**

1092 **compared to OSN\_eGFP- and had a fold change > 4 and average expression > 100 counts.**

1093

1094

1095

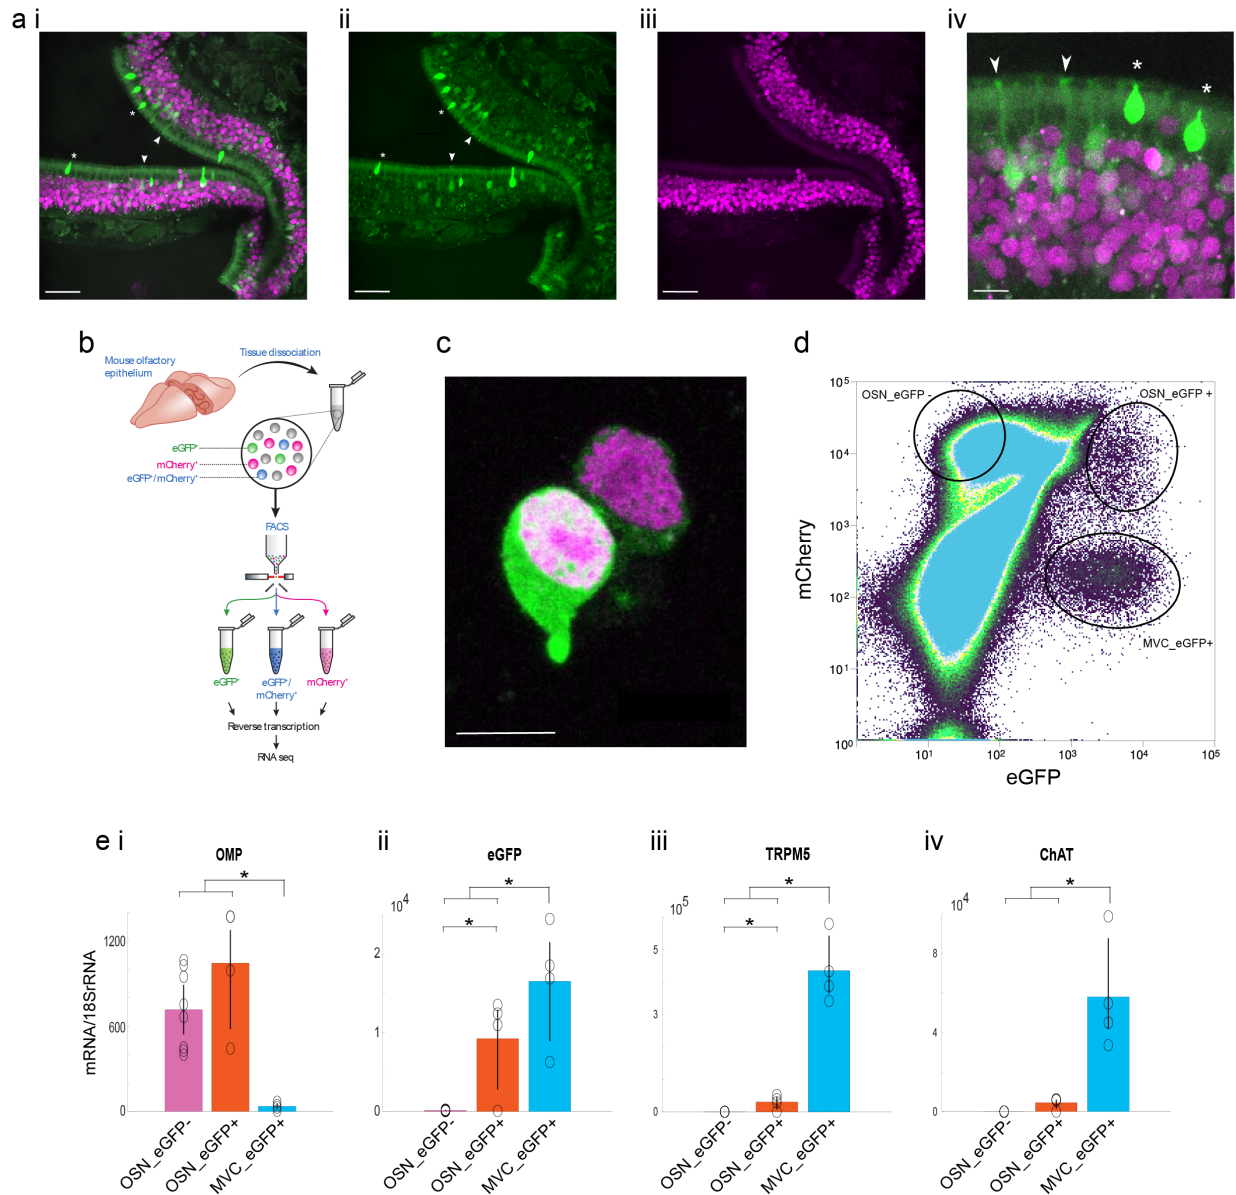

1096

1097 **Figure 1. Fluorescence activated sorting (FACS) of cells isolated from the olfactory**  
1098 **epithelium.**

1099 **a.** TRPM5 promoter driven expression of eGFP and OMP promoter driven expression of  
1100 mCherry in the olfactory epithelium. Expression of eGFP is found both in MVCs that do not  
1101 express mCherry (asterisk) and in OSNs double labeled with eGFP and mCherry (arrow). **i.**  
1102 Composite, **ii.** eGFP, **iii.** mCherry, **iv.** Composite magnification. Magenta: mCherry, green:  
1103 eGFP. Scale bar: i-iii, 50  $\mu$ m, iv, 10  $\mu$ m.

1104 **b.** Schematic of RNA-seq process from tissue to RNA extraction. Mouse OE was dissociated  
1105 into single cells and sorted via FACS. RNA was extracted from each of the resulting cell  
1106 populations.

1107 **c.** Two isolated OSNs differing in eGFP expression. Magenta: mCherry, green: eGFP. Scale bar:  
1108 10  $\mu$ m.

1109 **d.** Distribution of mCherry and eGFP fluorescence intensity for FACS-sorted cells. Three cell  
1110 populations were isolated for RNAseq: Cells with low OMP promoter-driven mCherry  
1111 expression and high TRPM5 promoter-driven eGFP expression (MVC\_eGFP cells), cells with  
1112 high OMP promoter-driven mCherry and low eGFP expression (OSN\_eGFP- cells) and cells  
1113 with eGFP expression of the same magnitude as MVC\_eGFP cells and high OMP promoter-  
1114 driven mCherry expression (OSN\_eGFP+ cells). The number of cells collected for this FACS  
1115 run were: OSN\_eGFP-s 1,500,000, OSN\_eGFP+s 5336 and MVC\_eGFP cells 37,178.

1116 **e.** qPCR levels (normalized to levels 18s RNA) for expression of transcripts encoding for OMP  
1117 **(i)**, TRPM5 **(ii)**, eGFP **(iii)** and ChAT **(iv)**. The asterisks denote significant differences tested  
1118 with either t-test or ranksum with p-values below the significance p-value corrected for multiple  
1119 comparisons using the false discovery rate (pFDR)(Curran-Everett, 2000). pFDR is 0.033 for  
1120 OMP, 0.05 for TRPM5, 0.05 for eGFP and 0.03 for ChAT, n=8 for OMP OSN\_eGFP-s, 4 for  
1121 OMP OSN\_eGFP+s and 4 for MVC\_eGFP cells.

1122

1123



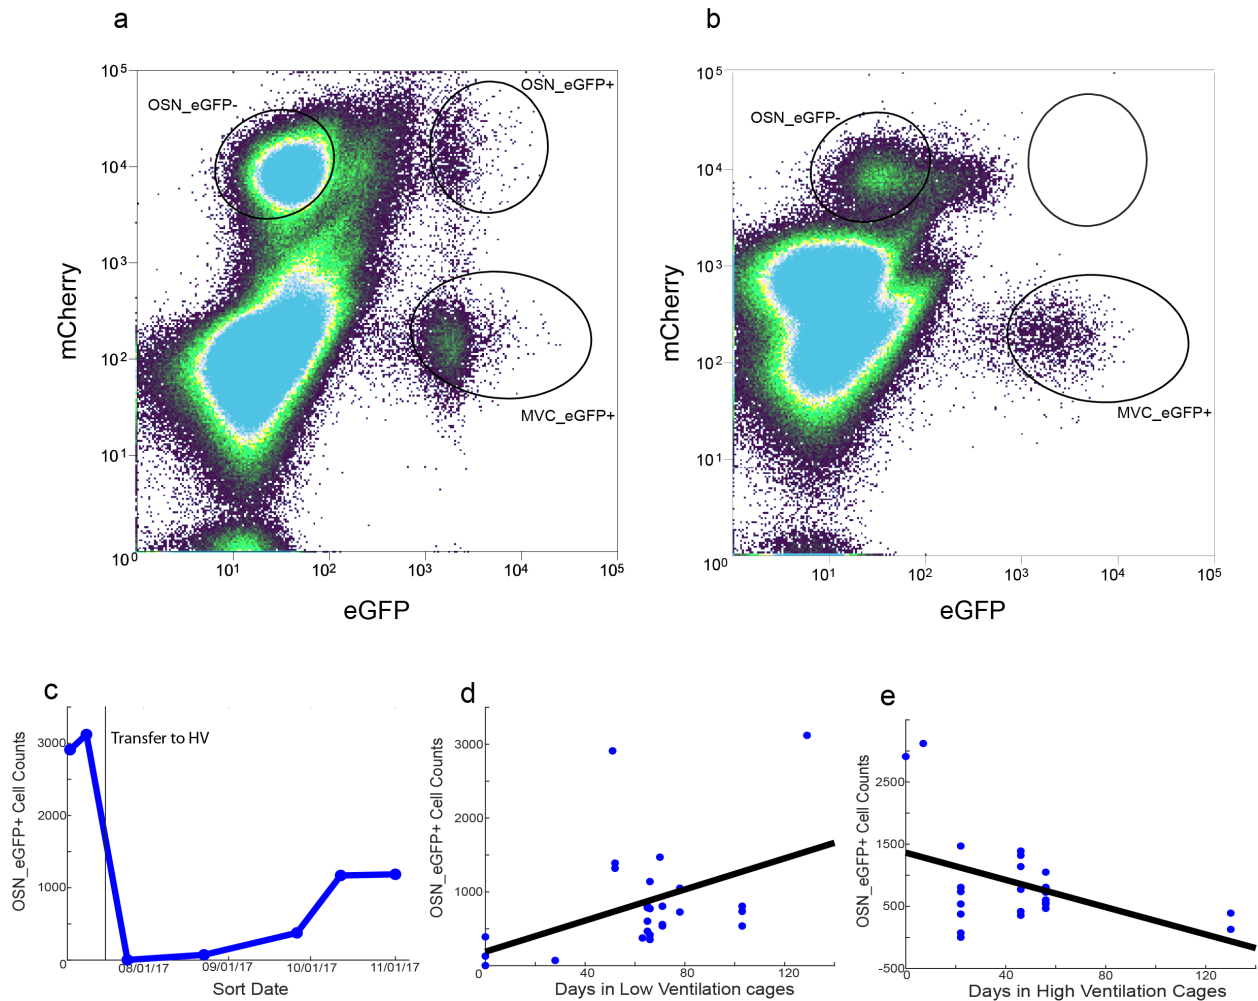

1124

1125 **Figure 2. Decreased yield of OSN\_eGFP+ cells when mice are moved from low ventilation**  
1126 **(LV) to high ventilation (HV) cages.**

1127 **a and b.** Distribution of mCherry and eGFP fluorescence intensity for FACS-sorted cells that  
1128 either were not transferred to HV cages (**a**) or were transferred to HV cages for 22 days before  
1129 sorting (**b**).

1130 **c.** Time course showing change in the number of sorted OSN\_eGFP+s after mice were  
1131 transferred to HV cages.

1132 **d and e.** Dependence of the yield of OSN\_eGFP+ cells after sorting on the number of days in  
1133 LV cages (**d**) or the number of days in HV cages (**e**).

1134

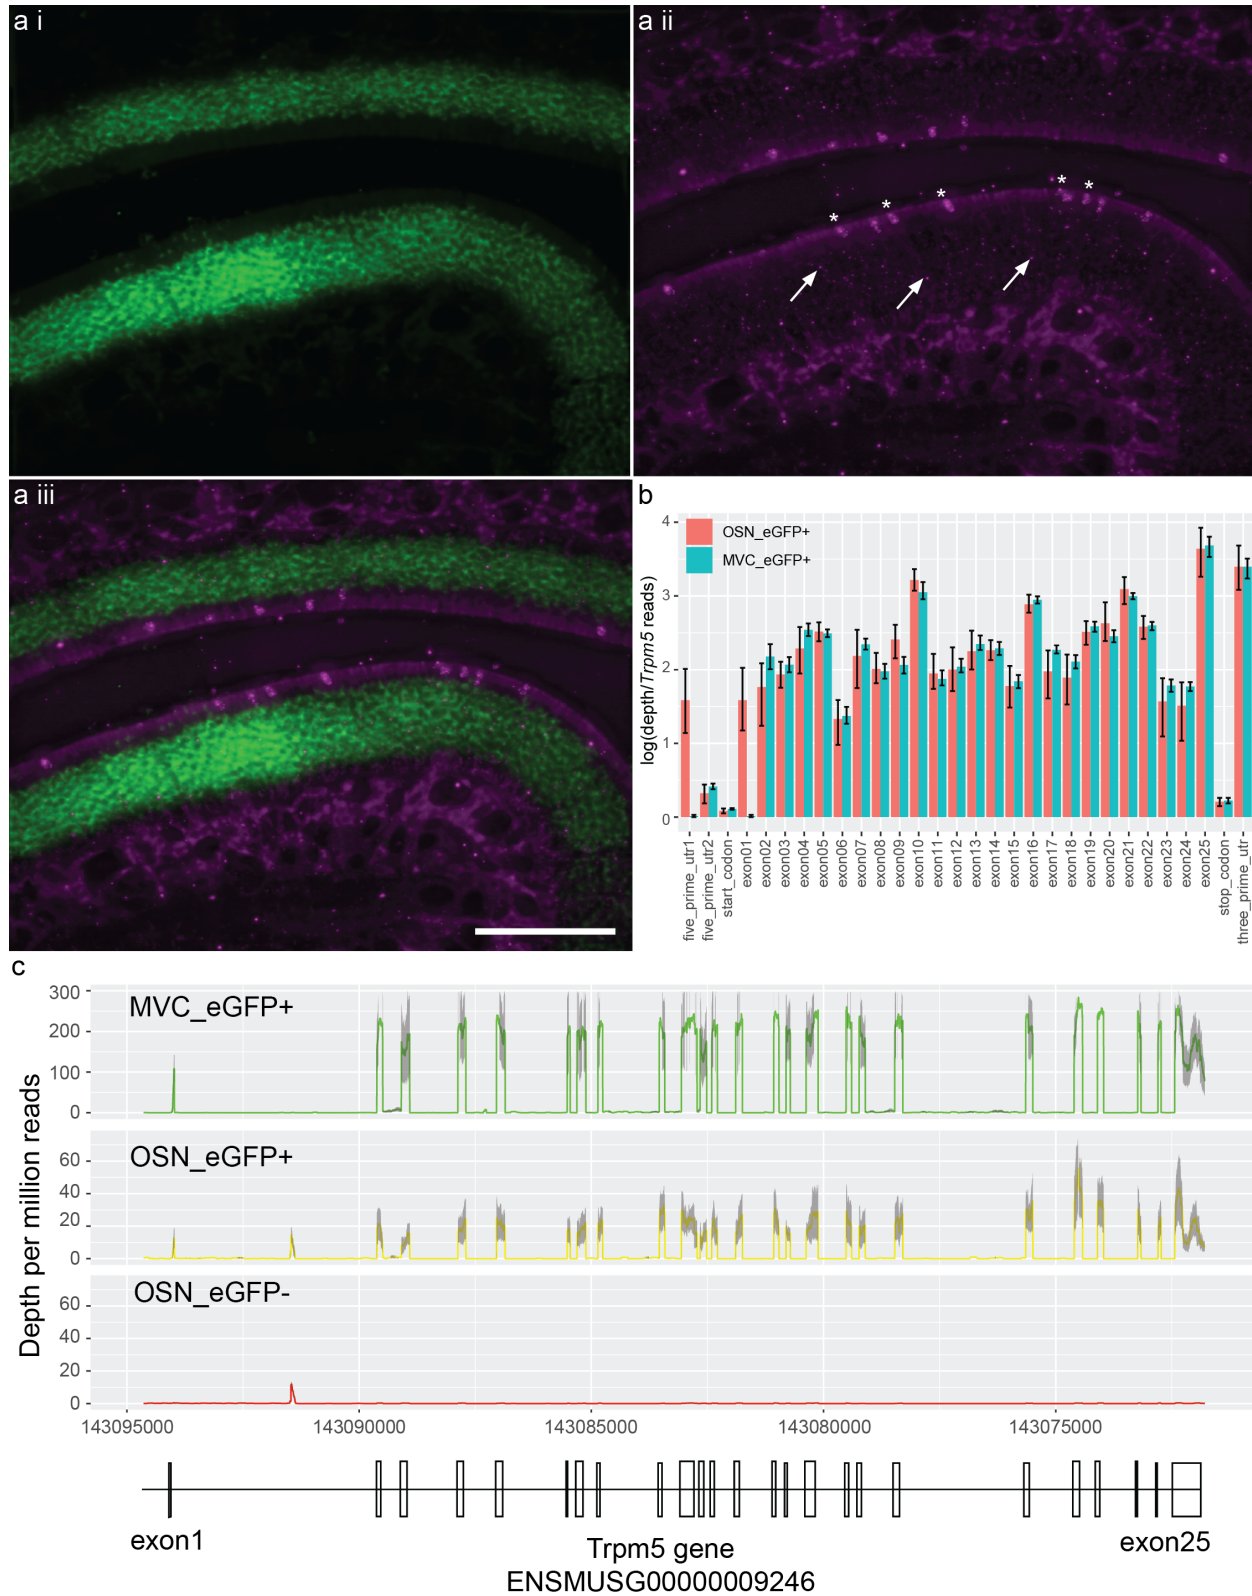

1135

1136 **Figure 3. Coverage of TRPM5 transcript by RNAseq in the different cell groups sorted**  
1137 **from the olfactory epithelium**

1138 **a.** In situ for TRPM5 and OMP transcripts in the olfactory epithelium shows strong label for  
1139 TRPM5 in MVCs (asterisks) and sparse labeling in the OSN nuclear layer (arrows). **i.** OMP, **ii.**  
1140 TRPM5, **iii.** Composite. The scale bar is 100  $\mu$ m.

1141 **b and c.** Coverage of the reads for the TRPM5 transcript for the different cell groups. Read  
1142 coverage was computed with ‘Samtools depth’ over the region corresponding to the *Trpm5* gene.

1143 **b.** Coverage per exon. All samples normalized to TRPM5 reads show distribution among exons  
1144 with little difference between MVC and OSN\_eGFP+ cells.

1145 **c.** Coverage shown per base pair as a function of location in the genomic DNA. Plots show read  
1146 depth per base pair for each cell type normalized to total number of mapped reads. Gray shading  
1147 indicates 95% confidence interval.

1148

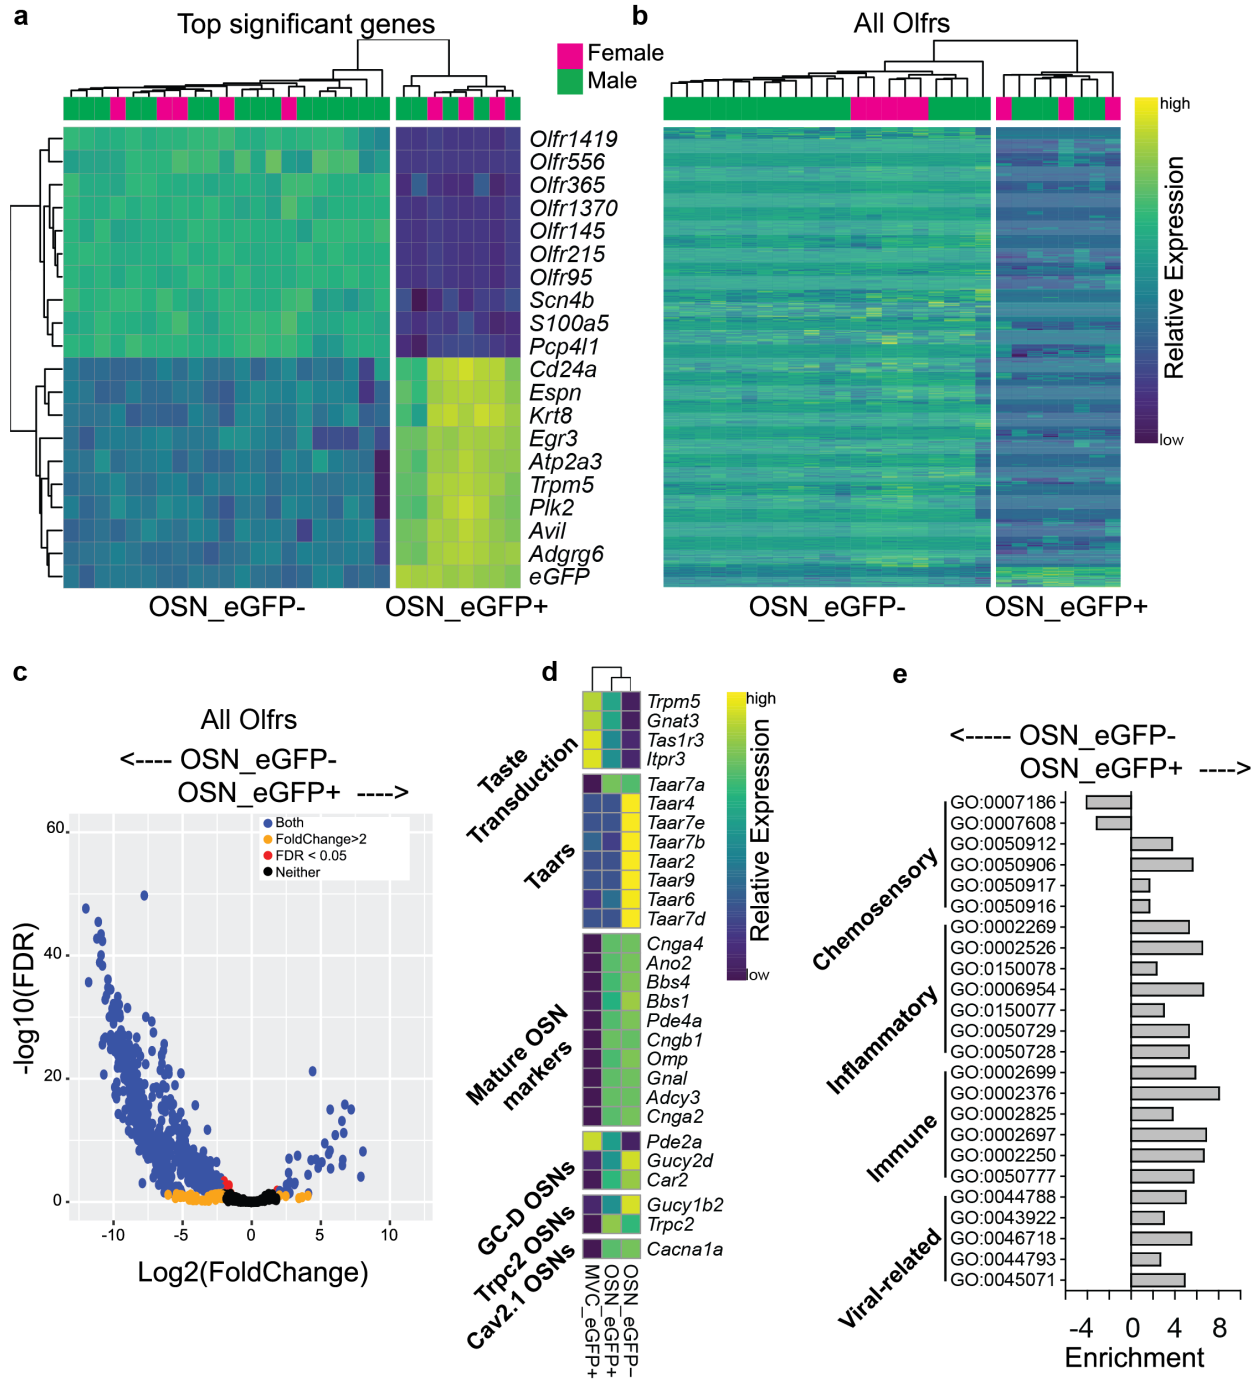

1149

1150 **Figure 4. RNAseq comparison of OSN\_eGFP- and OSN\_eGFP+ cells.**

1151 **a.** Heatmap showing the top 10 upregulated and top 10 downregulated genes identified by  
 1152 DESeq2.

1153 **b.** Heatmap showing all *Olfre* genes detected in the data.

1154 For both a and b, row and column order were determined automatically by the *pHeatmap*  
1155 package in R. For each data point relative expression was calculated by subtracting the average  
1156 row value from each individual value.

1157 **c.** Volcano plot of all Olfactory receptors, demonstrating the small number of enriched olfactory  
1158 receptors in the OSN\_eGFP+ population.

1159 **d.** Hierarchical clustering of transcripts for taste transduction and transcripts expressed in  
1160 canonical and non-canonical OSNs identified by RNAseq as significantly different in expression  
1161 between the cell groups. We compared expression of transcripts involved in taste transduction,  
1162 canonical olfactory transduction, and non-canonical OSNs. The non-canonical OSNs considered  
1163 here included guanylyl-cyclase D (GC-D) OSNs (Juilfs et al., 1997), Trpc2 OSNs (Omura and  
1164 Mombaerts, 2014), Cav2.1 OSNs (Pyrski et al., 2018), and OSNs expressing trace amine-  
1165 associated receptors (Taars) (Liberles, 2015). Transcripts identified by DESeq2.

1166 **e.** Gene ontology (GO) term enrichment was calculated from differentially expressed genes using  
1167 *TopGO* in R. An enrichment value for genes with Fischer p value <0.05 was calculated by  
1168 dividing the number of expressed genes within the GO term by the number expected genes (by  
1169 random sampling, determined by *TopGO*).

1170  
1171  
1172

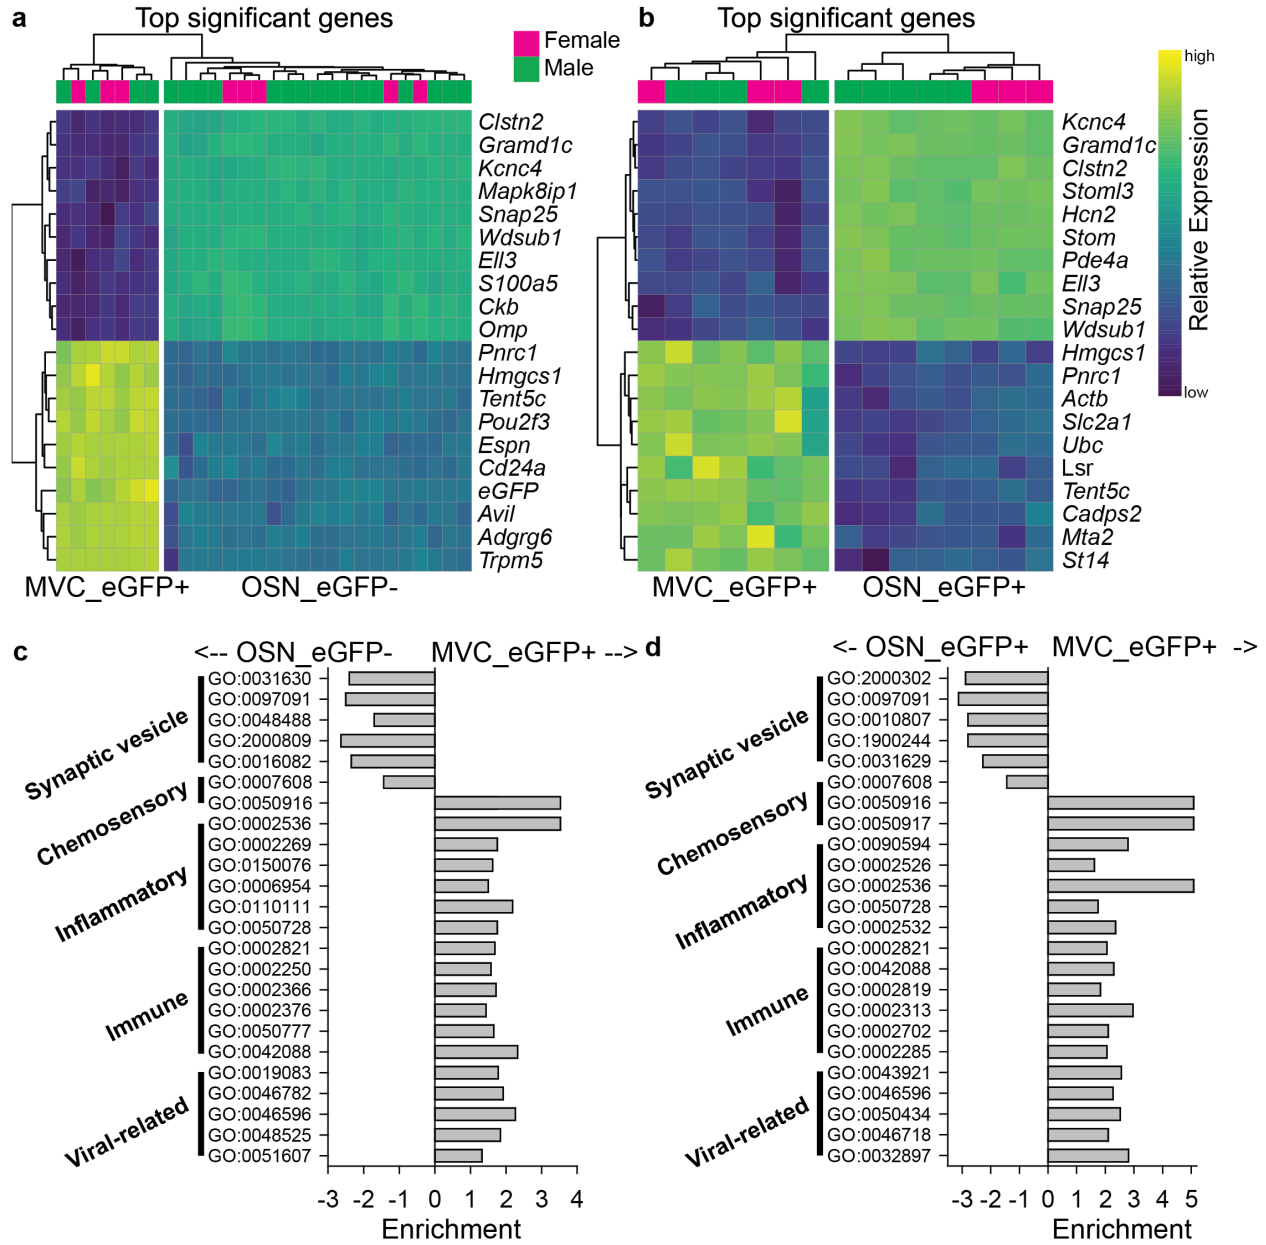

1173

1174 **Figure 5. RNAseq comparison of OSN\_eGFP- and OSN\_eGFP+ vs. MVC\_eGFP cells.**

1175 **a and b.** Heatmaps showing hierarchical clustering of the top 10 upregulated and top 10

1176 downregulated genes identified by DESeq2. **a.** OSN\_eGFP- vs. MVC\_eGFP cells. **b.**

1177 OSN\_eGFP+ vs. MVC\_eGFP cells. For both a and b, row and column order were determined

1178 automatically by the *pHeatmap* package in R. For each data point relative expression was

1179 calculated by subtracting the average row value from each individual value.

1180 **c and d.** Gene ontology (GO) term enrichment was calculated from differentially expressed  
1181 genes using *TopGO* in R. **c.** OSN\_eGFP- vs. MVC\_eGFP cells. **d.** OSN\_eGFP+ vs.  
1182 MVC\_eGFP cells. An enrichment value for genes with Fischer p value <0.05 was calculated by  
1183 dividing the number of expressed genes within the GO term by the number expected genes (by  
1184 random sampling, determined by *TopGO*).

1185

1186



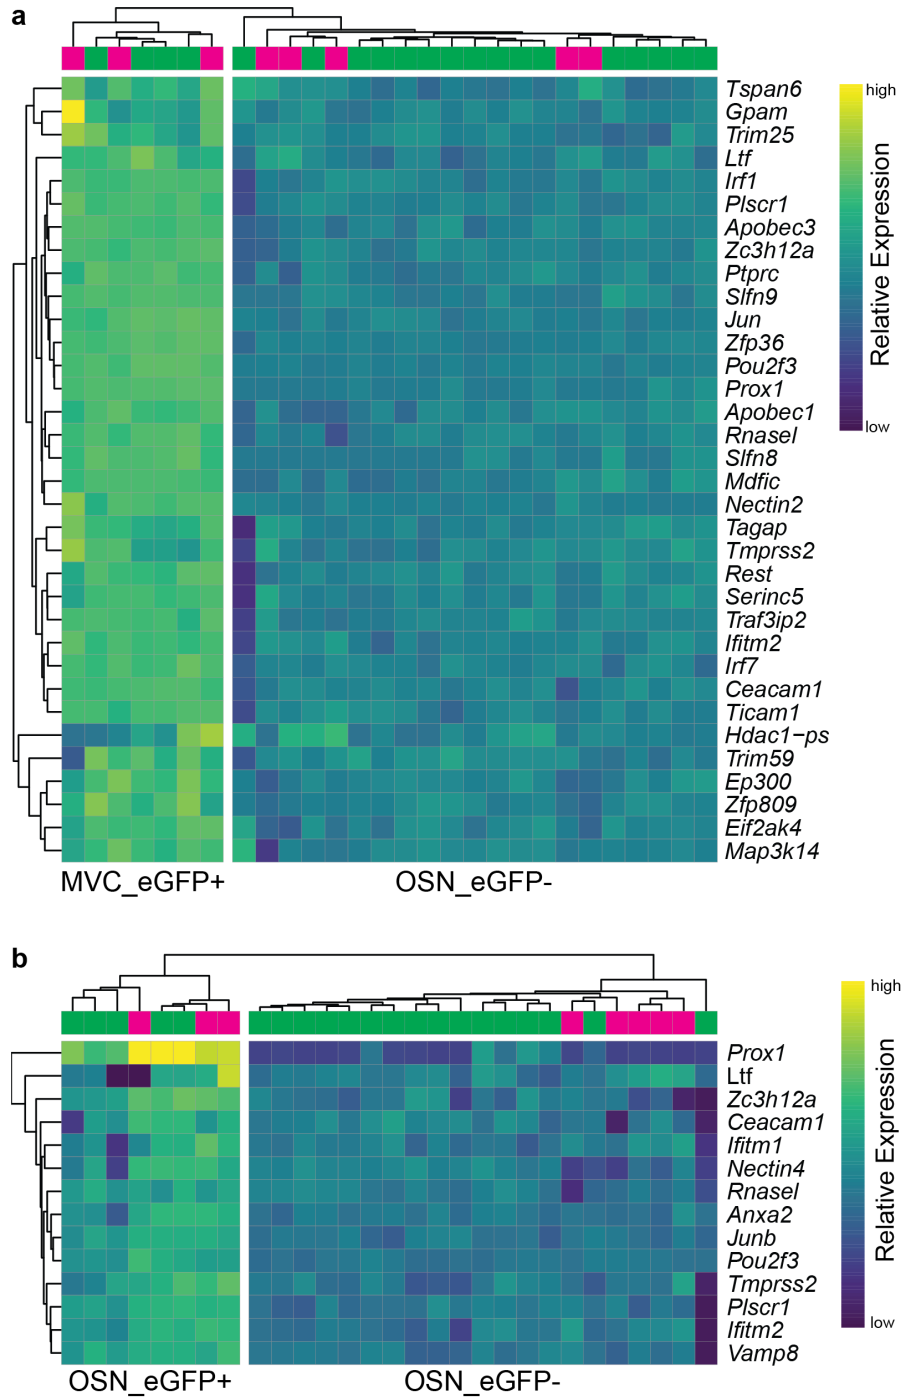

1187

1188 **Figure 6. Significant differences in virally-related gene ontology.** Heatmaps show hierarchical

1189 clustering of significantly differentially expressed genes identified by DESeq2. **a.** MVC\_eGFP

1190 cells compared to OSN\_eGFP-. **b.** OSN\_eGFP+ compared to OSN\_eGFP-.

1191



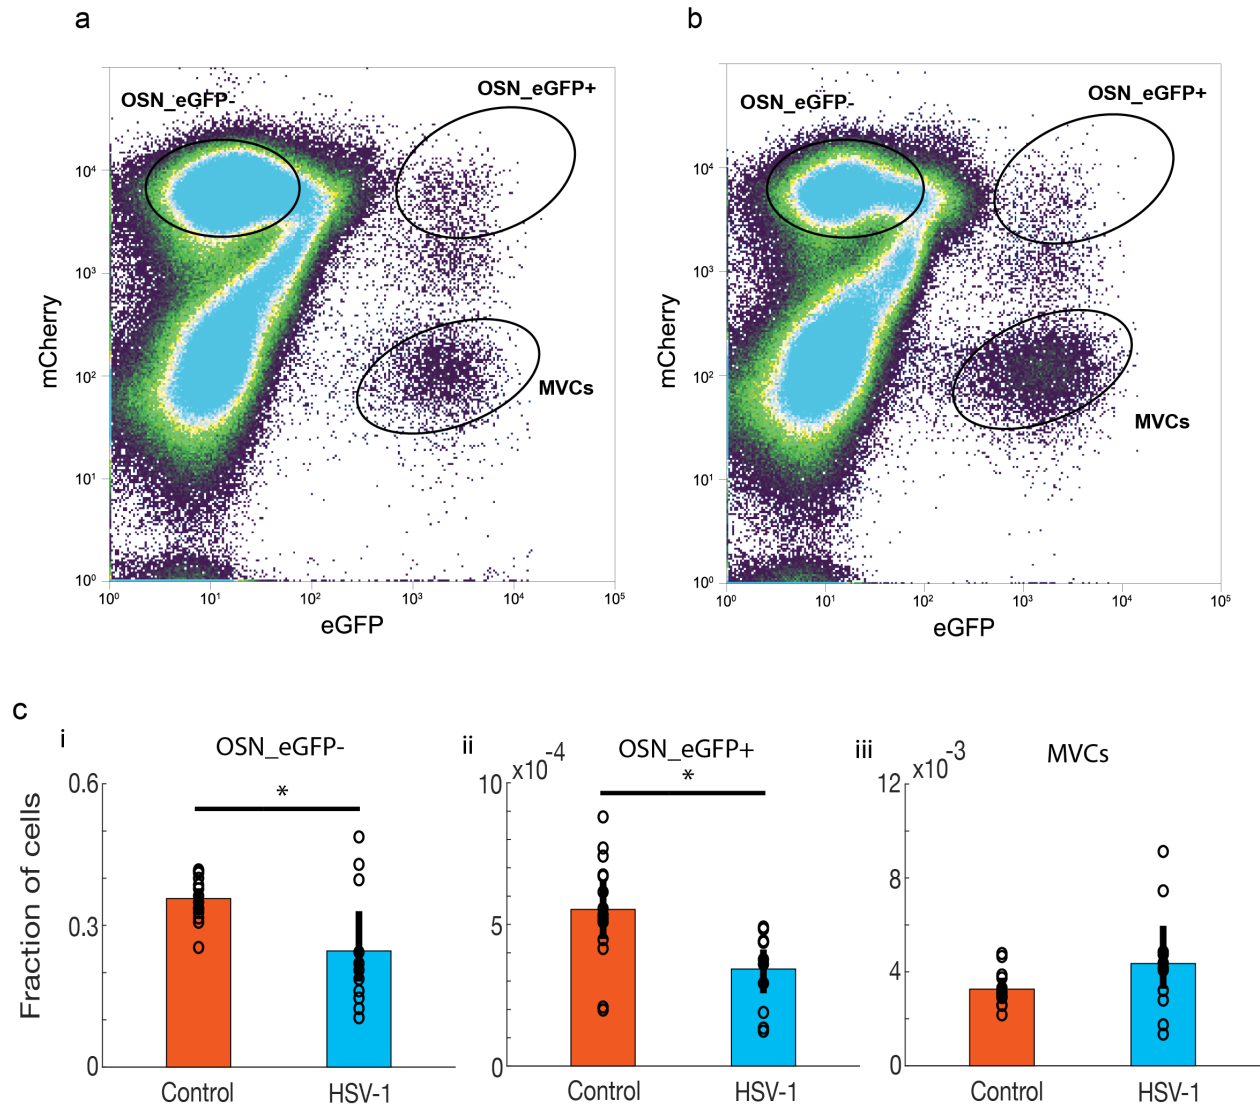

1192

1193 **Figure 7. Intranasal inoculation with HSV-1 elicits a decrease in OSNs.**

1194 **a and b.** Distribution of mCherry and eGFP fluorescence intensity for FAC-sorted cells that

1195 either were not infected (**a**) or were inoculated intranasally with 10  $\mu$ L of solution per naris (20

1196  $\mu$ L total with HSV-1 ( $1 \times 10^6$  PFU/naris; McKrae strain) 5 DPI (**b**).

1197 **c.** Fraction of total cells for OSN\_eGFP- (**i**), OSN\_eGFP+ (**ii**) or MVC (**iii**) cell groups. GLM

1198 analysis yielded significant effects for the fraction of OSN\_eGFP- compared to MVCs ( $p < 0.001$ )

1199 and for the interaction between the fraction of OSN\_eGFP- compared to MVCs and HSV-1

1200 treatment ( $p < 0.001$ , 75 observations, 69 d.f., GLM F-statistic=111 and p-value  $< 0.001$ ,  $n=14$

1201 mice for control, n=11 mice for HSV-1 inoculation). Asterisks denote a significant difference

1202 post-hoc with t-test p-value < pFDR = 0.047.

1203

1204

## Supplemental Information

1205

1206

1207 **Transcriptional profiling reveals TRPM5-expressing cells involved in viral infection in the**

1208

**olfactory epithelium**

1209

1210 B. Dnate' Baxter<sup>1,2,‡</sup>, Eric D. Larson<sup>3,‡</sup>, Paul Feinstein<sup>4</sup>, Arianna Gentile Polese<sup>1,2</sup>, Andrew N.

1211 Bubak<sup>5</sup>, Christy S. Niemeyer<sup>5</sup>, Laetitia Merle<sup>1,2</sup>, Doug Shepherd<sup>6</sup>, Vijay R. Ramakrishnan<sup>3</sup>,

1212 Maria A. Nagel<sup>5</sup>, and Diego Restrepo<sup>1,2,\*</sup>

1213

1214

1215 **Figure 4 – figure supplement 1. Excel worksheet with the results of comparison of gene**  
1216 **transcription between OSN\_EGFP+ and OSN\_EGFP-.**

1217

1218 **Figure 4 – figure supplement 2. Metadata for the RNAseq.**

1219

1220 **Figure 5 - figure supplement 1. Excel worksheet with the results of comparison of gene**  
1221 **transcription between MVC\_eGFP cells and OSN\_EGFP-.**

1222

1223 **Figure 5 - figure supplement 2. Excel worksheet with the results of comparison of gene**  
1224 **transcription between MVC\_eGFP cells and OSN\_EGFP+.**

1225

1226

1227

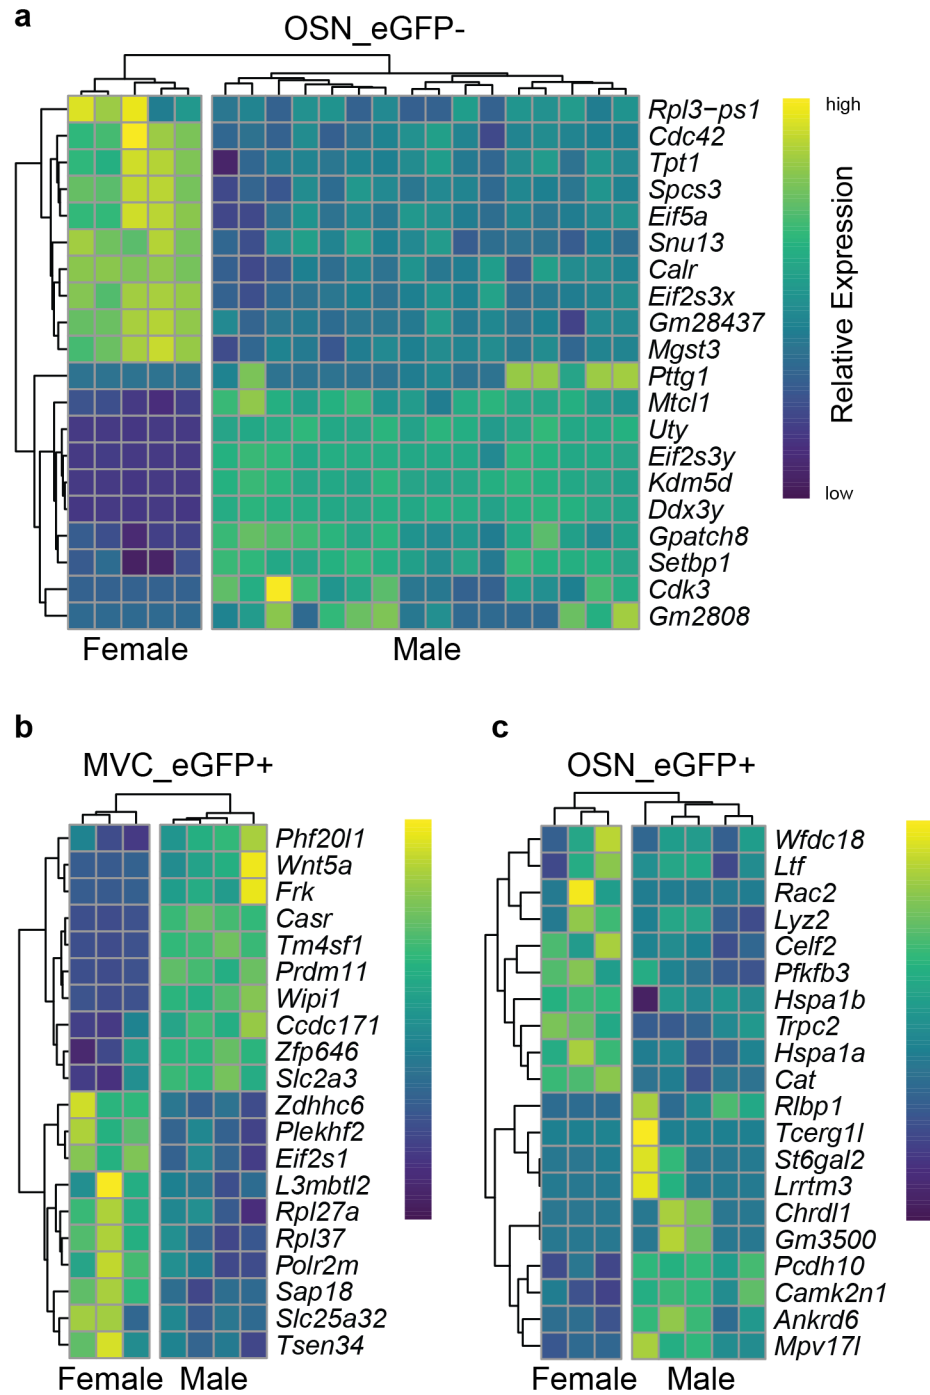

1228

1229 **Figure 5 – figure supplement 3. Hierarchical clustering of transcripts identified by RNAseq**

1230 **as significantly differentially expressed between male and female. a. OSN\_eGFP-. b.**

1231 **MVC\_eGFP cells c. OSN\_eGFP+. Transcripts identified by DESeq2.**

1232

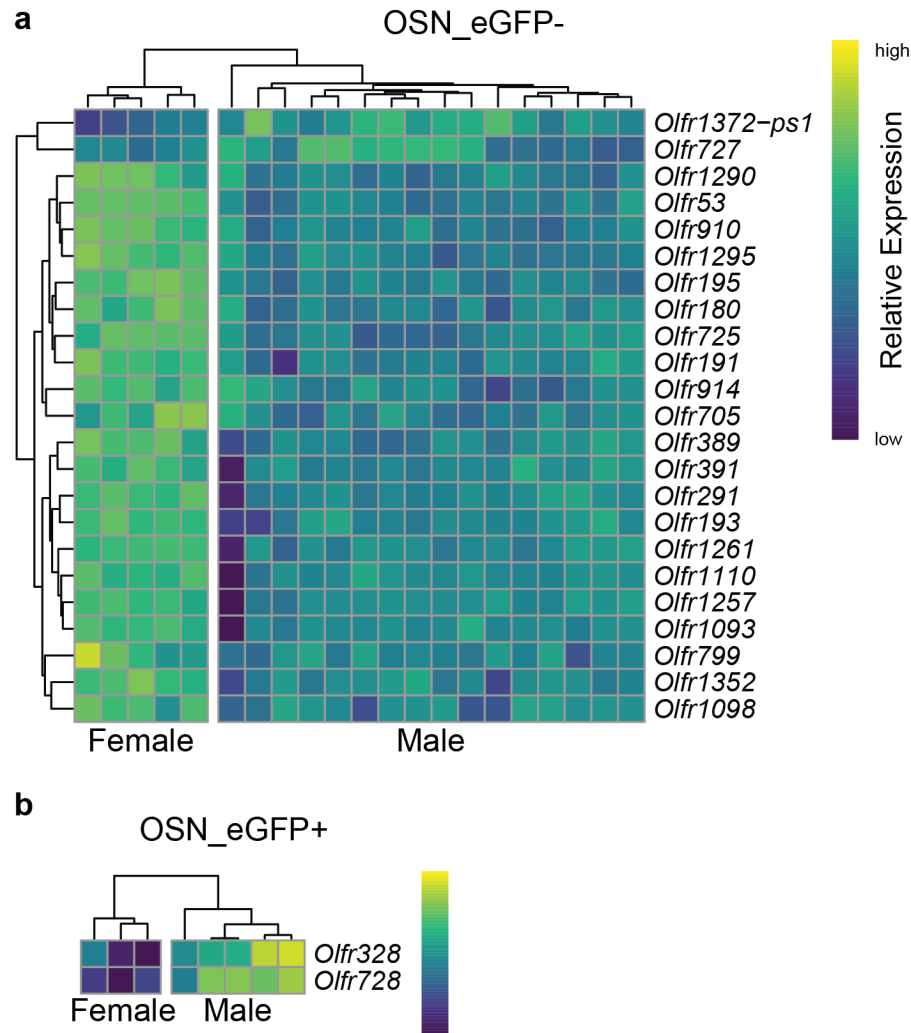

1233

1234 **Figure 5 – figure supplement 4. Hierarchical clustering of olfactory receptor transcripts**

1235 **identified by RNAseq as significantly differentially expressed between male and female. a.**

1236 **OSN\_eGFP-. b. OSN\_eGFP+. Transcripts identified by DESeq2.**

1237

1238 **Figure 6 – figure supplement 1. Excel worksheet with the results of gene ontology**

1239 **enrichment analysis for OSN\_eGFP+ compared to OSN\_eGFP-.**

1240

1241 **Figure 6 - figure supplement 2. Excel worksheet with the results of gene ontology**

1242 **enrichment analysis for MVC\_eGFP cells compared to OSN\_EGFP-.**

1243

1244 **Figure 6- figure supplement 3. Excel worksheet with the results of gene ontology**

1245 **enrichment analysis for MVC\_eGFP cells compared to OSN\_EGFP+.**

1246

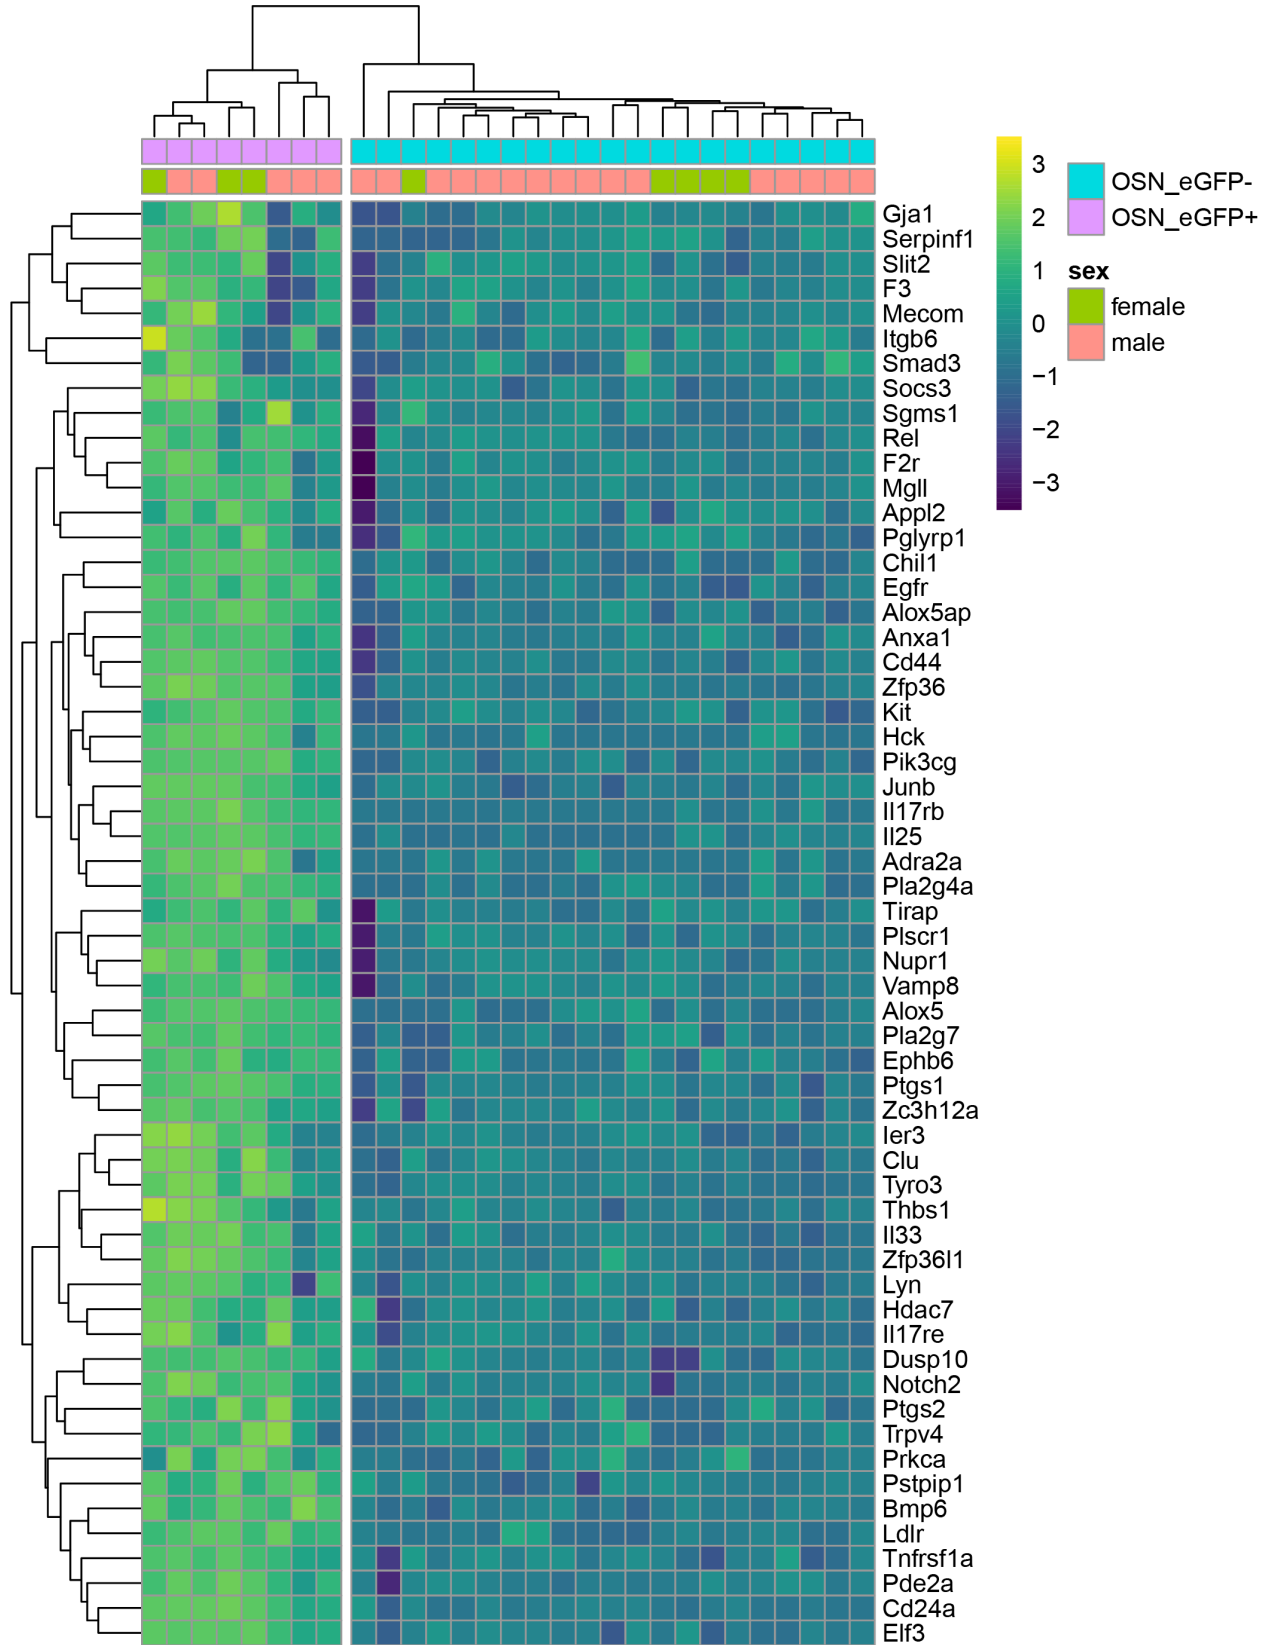



1248 **Figure 6- figure supplement 4. Significant differences in inflammation gene ontology for**

1249 **OSN\_eGFP+ compared to OSN\_eGFP-.**

1250

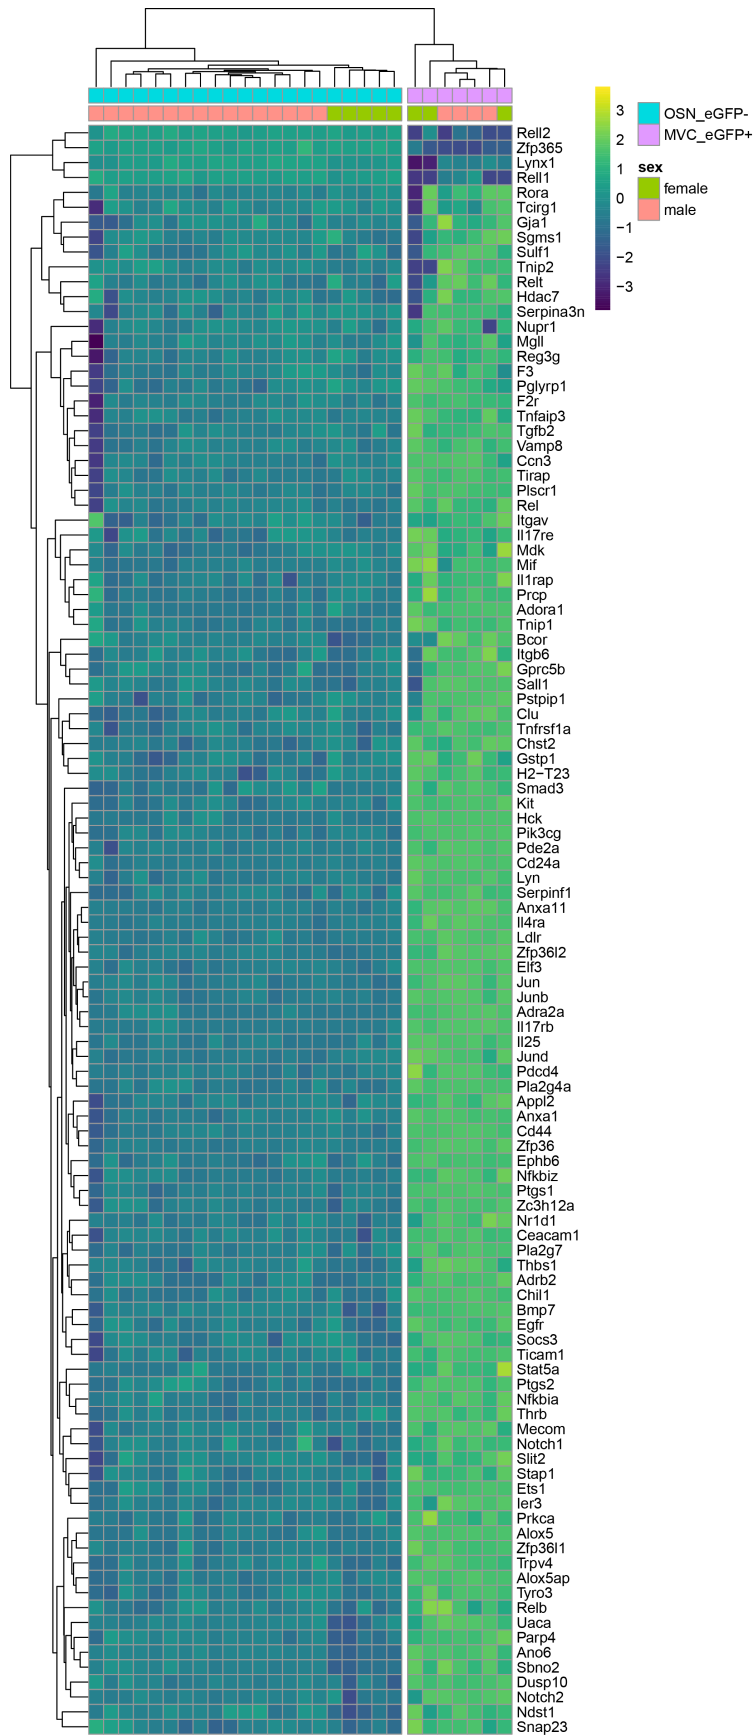

1252 **Figure 6- figure supplement 5. Significant differences in inflammation gene ontology for**

1253 **MVC\_eGFP+ compared to OSN\_eGFP-.**

1254

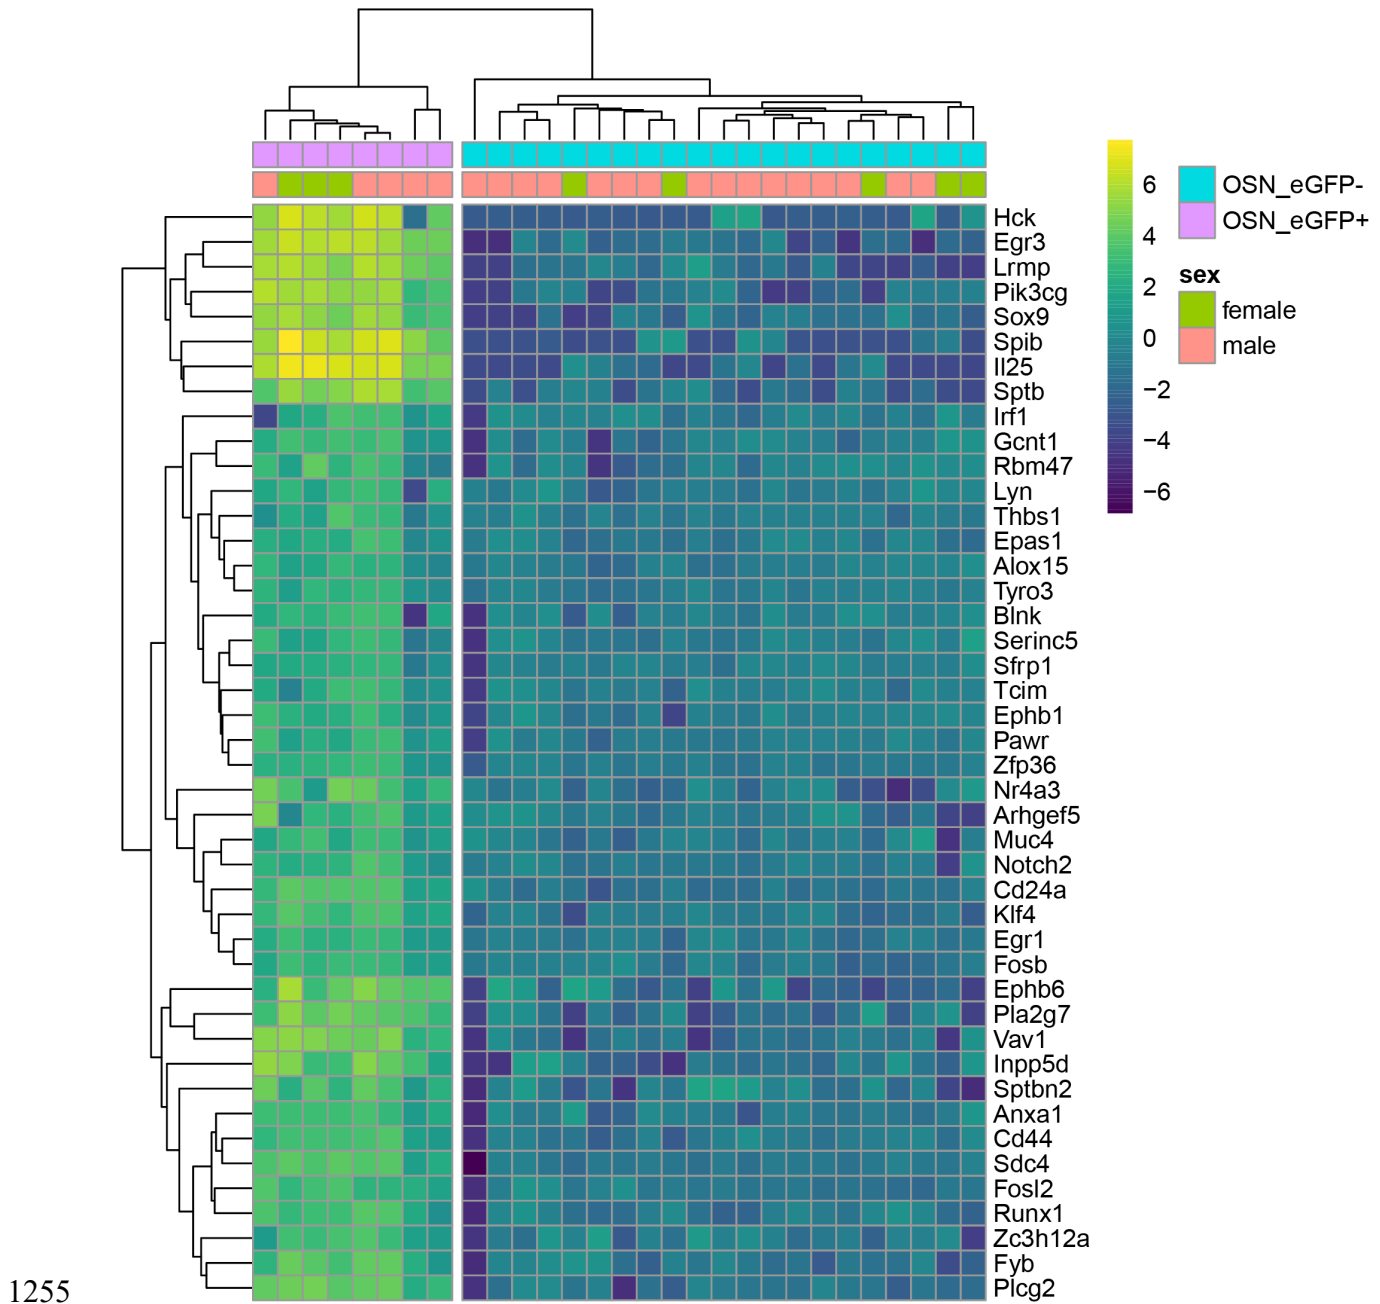

1256 **Figure 6- figure supplement 6. Significant differences in immune gene ontology for**  
1257 **OSN\_eGFP+ compared to OSN\_eGFP-.**

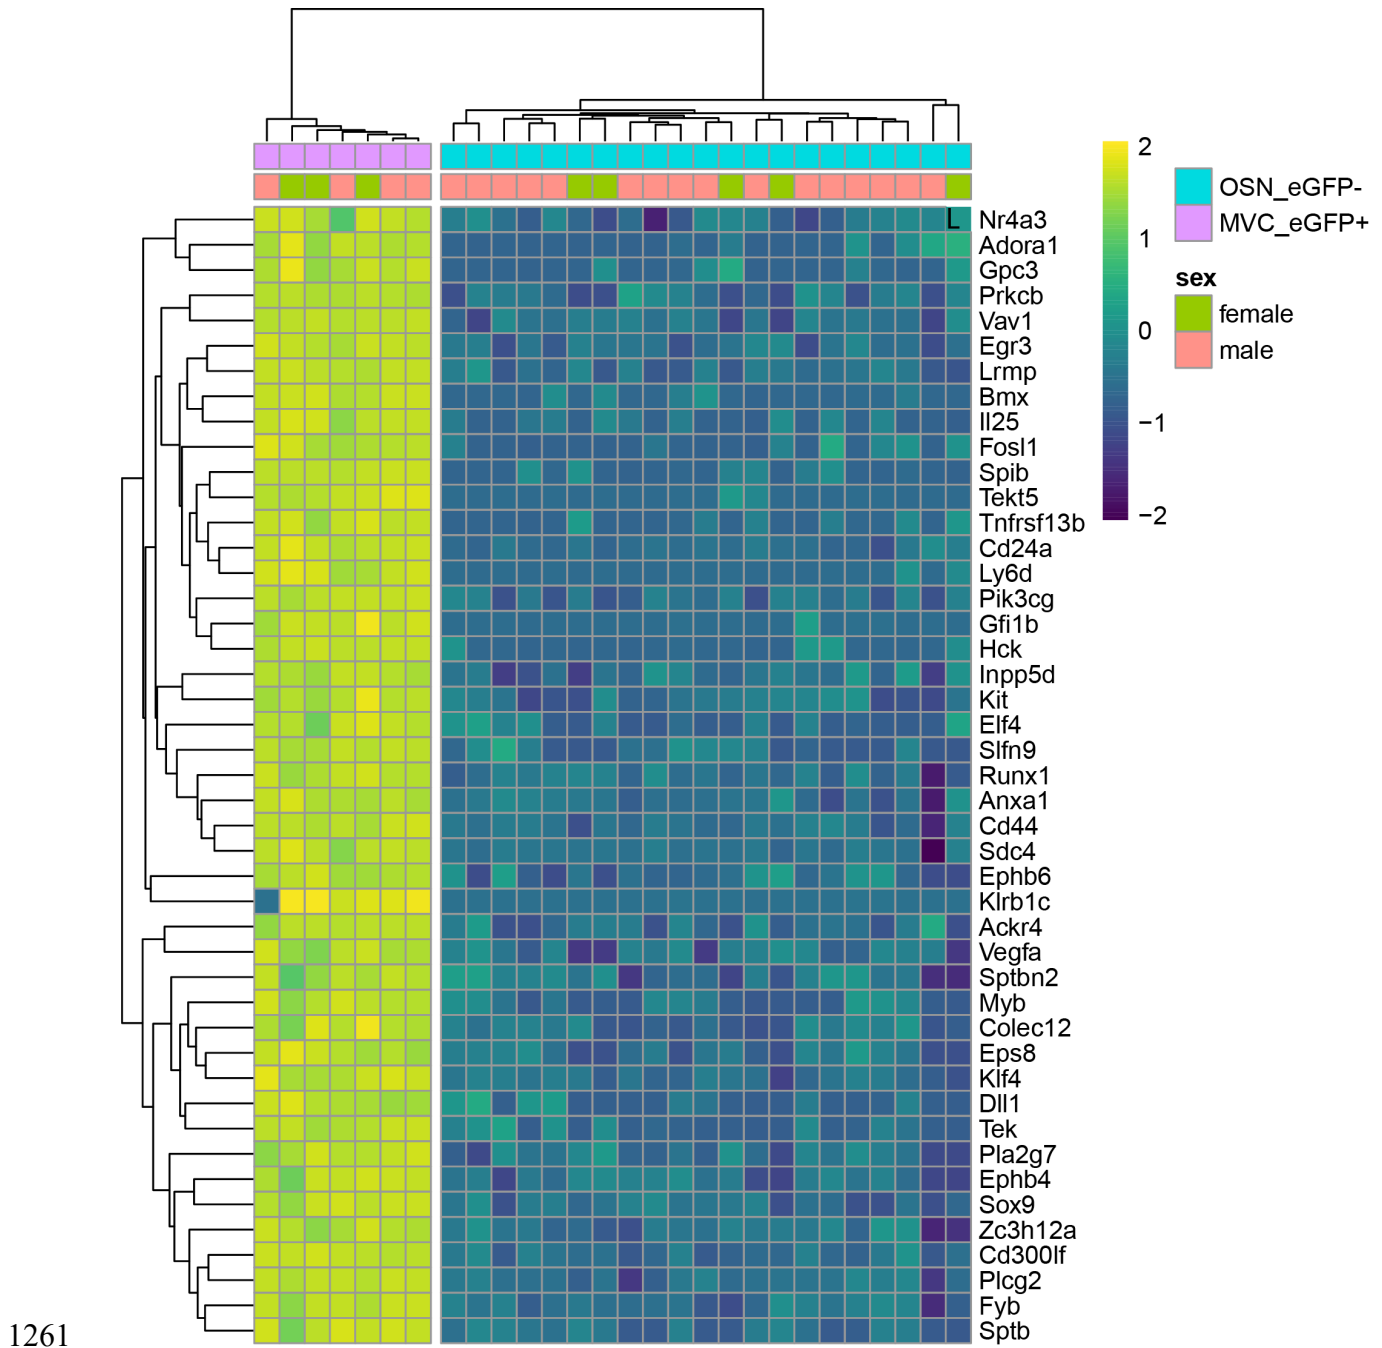

**Figure 6- figure supplement 7. Significant differences in immune gene ontology for MVC\_eGFP+ compared to OSN\_eGFP-.**
