1 **Transcriptional profiling reveals potential involvement of microvillous TRPM5-expressing**  
2 **cells in viral infection of the olfactory epithelium**

3  
4 B. Dnate' Baxter<sup>1,2,‡</sup>, Eric D. Larson<sup>3,‡</sup>, Laetitia Merle<sup>1,2,‡</sup>, Paul Feinstein<sup>4</sup>, Arianna Gentile  
5 Polese<sup>1,2</sup>, Andrew N. Bubak<sup>5</sup>, Christy S. Niemeyer<sup>5</sup>, James Hassell, Jr.<sup>5</sup>, Doug Shepherd<sup>6</sup>, Vijay  
6 R. Ramakrishnan<sup>3</sup>, Maria A. Nagel<sup>5</sup>, and Diego Restrepo<sup>1,2,\*</sup>

7  
8 <sup>1</sup>Neuroscience Graduate Program, University of Colorado Anschutz Medical Campus, Aurora,  
9 CO 80045, USA

10 <sup>2</sup>Department of Cell and Developmental Biology, University of Colorado Anschutz Medical  
11 Campus, Aurora, CO 80045, USA

12 <sup>3</sup>Department of Otolaryngology, University of Colorado Anschutz Medical Campus, Aurora, CO  
13 80045, USA

14 <sup>4</sup>Department of Biological Sciences, Hunter College, CUNY, New York, NY, 10065, USA

15 <sup>5</sup>Department of Neurology, University of Colorado Anschutz Medical Campus, Aurora, CO  
16 80045, USA

17 <sup>6</sup>Department of Pharmacology, University of Colorado Anschutz Medical Campus and  
18 Center for Biological Physics and Department of Physics, Arizona State University, USA

19

20

21

22 ‡Co-first authors

23 \*Corresponding author: Diego Restrepo, [diego.restrepo@cuanschutz.edu](mailto:diego.restrepo@cuanschutz.edu)

24

25 **Abstract**

26 **Background:** Understanding viral infection of the olfactory epithelium is essential because the  
27 olfactory nerve is an important route of entry for viruses to the central nervous system.

28 Specialized chemosensory epithelial cells that express the transient receptor potential cation  
29 channel subfamily M member 5 (TRPM5) are found throughout the airways and intestinal  
30 epithelium and are involved in responses to viral infection.

31 **Results:** Herein we performed deep transcriptional profiling of olfactory epithelial cells sorted  
32 by flow cytometry based on the expression of mCherry as a marker for olfactory sensory neurons  
33 and for eGFP in OMP-H2B::mCherry/TRPM5-eGFP transgenic mice (*Mus musculus*). We find  
34 profuse expression of transcripts involved in inflammation, immunity and viral infection in  
35 TRPM5-expressing microvillous cells.

36 **Conclusion:** Our study provides new insights into a potential role for TRPM5-expressing  
37 microvillous cells in viral infection of the olfactory epithelium. We find that, as found for  
38 solitary chemosensory cells (SCCs) and brush cells in the airway epithelium, and for tuft cells in  
39 the intestine, the transcriptome of TRPM5-expressing microvillous cells indicates that they are  
40 likely involved in the inflammatory response elicited by viral infection of the olfactory  
41 epithelium.

42 **Keywords:** Olfactory sensory neurons, Microvillous cells, Viral infection, Immunity,  
43 Inflammation, Mouse

## 44 **Background**

45  
46 Chemosensory cells found in the airway (SCCs/brush cells) and intestinal epithelium (tuft cells)  
47 express the transient receptor potential cation channel subfamily M member 5 (TRPM5) and  
48 other elements of the taste transduction pathway and have been implicated in immune and  
49 inflammatory responses to bacterial, viral and parasitic infection (Luo et al., 2019; Maina et al.,  
50 2018; O'Leary et al., 2019; Perniss et al., 2020; Rane et al., 2019; Saunders et al., 2014; Tizzano  
51 et al., 2010). In the olfactory epithelium TRPM5 and other proteins involved in taste transduction  
52 are also expressed in SCC-like microvillous cells (MVCs)(Genovese and Tizzano, 2018; Lin et  
53 al., 2008), which have been proposed to be involved in a protective response to high  
54 concentrations of odorants (Fu et al., 2018; Lemons et al., 2017). However, whether MVCs play  
55 a role in viral infection or viral infection defense of the olfactory epithelium is unknown.

56  
57 Herein, we performed transcriptional profiling of MVCs and a subset of olfactory sensory  
58 neurons (OSNs) expressing eGFP under control of a fragment of the TRPM5 promoter  
59 (OSN\_eGFP+ cells)(Lin et al., 2007; Lopez et al., 2014). In order to profile these low abundance  
60 cells we used a modified version of Probe-Seq, which allows deep transcriptional profiling of  
61 specific cell types identified by fluorescent markers as the defining feature (Amamoto et al.,  
62 2019). We crossed a mouse expressing mCherry in the nuclei of OSNs under control of the OMP  
63 promoter (OMP-H2B::mCherry mice) with TRPM5-eGFP transgenic mice (Clapp et al., 2006)  
64 (OMP-H2B::mCherry/TRPM5-eGFP mice). We isolated cells from the olfactory epithelium and  
65 used fluorescence-activated cell sorting (FACS) to sort MVC\_eGFP cells (mCherry negative and  
66 eGFP positive) and cells labeled by OMP-driven mCherry that did or did not express eGFP

67 (OSN\_eGFP+ and OSN\_eGFP- cells) followed by transcriptional profiling by RNA sequencing

68 (RNAseq).

69

70

71 **Results**

72

73 **Fluorescence-activated cell sorting of cells isolated from the main olfactory epithelium.** The  
74 olfactory epithelium of OMP-H2B::mCherry/TRPM5-eGFP mice expressed nuclear mCherry  
75 driven by the OMP promoter in the intermediate layer of the olfactory epithelium (Figure 1a), as  
76 expected for the location of nuclei of mature OSNs (Farbman and Margolis, 1980). eGFP  
77 expression driven by the TRPM5 promoter was found in MVCs, with cell bodies located mostly  
78 in the apical layer of the epithelium (asterisks), and at lower expression levels in a subset of  
79 OSNs double-labeled with mCherry (Figure 1a), consistent with earlier publications (Lin et al.,  
80 2008; Lin et al., 2007).

81

82 We proceeded to isolate cells from the main olfactory epithelium of OMP-  
83 H2B::mCherry/TRPM5-eGFP mice (see Figure 1b, Methods and Figure 1 - figure supplement  
84 1). Figure 1c shows two isolated OSNs with differential expression of eGFP. Using flow  
85 cytometry we found that fluorescence intensity of individual cells for mCherry and eGFP  
86 spanned several orders of magnitude (Figure 1d). We proceeded to sort three groups of cells  
87 under light scattering settings to exclude doublets: high mCherry-expressing cells with low and  
88 high eGFP fluorescence (presumably mature OSNs, these cells are termed OSN\_eGFP- and  
89 OSN\_eGFP+ cells respectively) and cells with low mCherry and high eGFP expression  
90 (MVC\_eGFP, presumably MVCs). Reverse transcription quantitative PCR (RT-qPCR) showed  
91 that, as expected the OSN\_eGFP- and OSN\_eGFP+ cells have higher levels of OMP transcript  
92 than MVC\_eGFP cells (Figure 1e,i), and OSN\_eGFP+ cells and MVC\_eGFP cells have higher  
93 levels of eGFP transcript compared to OSN\_eGFP- cells (Figure 1e,ii). Furthermore, compared

94 to OSN\_eGFP- cells both the MVC\_eGFP cells and OSN\_eGFP+ cells expressed higher levels  
95 of TRPM5 transcript (Figure 1e,iii) and choline acetyl transferase (ChAT)(Figure 1e,iv), a  
96 protein involved in acetylcholine neurotransmission that is expressed in MVCs (Ogura et al.,  
97 2011). The asterisks in Figure 1e denote significant differences tested with either t-test or  
98 ranksum with p-values below the p-value of significance corrected for multiple comparisons  
99 using the false discovery rate (pFDR)(Curran-Everett, 2000) (pFDR is 0.033 for OMP, 0.05 for  
100 TRPM5, 0.05 for EGFP and 0.03 for ChAT, n=8 for OMP OSN\_eGFP-, 4 for OMP  
101 OSN\_eGFP+ and 4 for MVC\_eGFP cells).

102 **RNAseq indicates that MVC\_eGFP and OSN\_eGFP- are distinct groups of chemosensory**  
103 **cells in the mouse olfactory epithelium.** Differential gene expression analysis of the RNAseq  
104 data was used to compare MVC\_eGFP and OSN\_eGFP- sorted by FACS. Expression of 4386  
105 genes was significantly higher in MVC\_eGFP cells compared to OSN\_eGFP- cells, and  
106 expression of 5630 genes was lower in MVC\_eGFP cells (Figure 2a shows the most significantly  
107 upregulated or downregulated genes and Figure 2 – figure supplement 1 shows the entire list). A  
108 total of 1073 *Olf* genes were included in the analysis (including pseudogenes). While 9 were  
109 expressed at higher levels in the MVC\_eGFP population their expression levels was very low  
110 (<100 counts) and the difference was not statistically significant. On the contrary, transcripts for  
111 550 olfactory receptors were significantly higher in OSN\_eGFP- cells (Figure 2b and 2c).  
112 *Trpm5* and *eGFP* were among the top 10 genes whose transcription was higher in MVC\_eGFP  
113 cells compared to OSN\_eGFP- cells with 1471-fold and 75-fold differences respectively (Figure  
114 2a). Interestingly, *Pou2f3*, a transcription factor important in differentiation of MVCs  
115 (Yamaguchi et al., 2014; Yamashita et al., 2017), is found within the top 10 upregulated genes  
116 found in MVC\_eGFP cells compared to OSN\_eGFP- (Figure 2a). In addition, transcripts for

117 chemosensory cell specific cytokine IL-25 and its receptor IL-17RB (Ualiyeva et al., 2020) were  
118 more highly expressed in MVC\_eGFP (Figure 2 – figure supplement 1). Finally, *OMP* and  
119 *s100a5*, genes for two proteins expressed in mature OSNs (Farbman and Margolis, 1980; Fischl  
120 et al., 2014), were among the top 10 downregulated transcripts in MVC\_eGFP cells compared to  
121 OSN\_eGFP- cells (Figure 2a).

122  
123 We compared expression of transcripts involved in taste transduction, canonical olfactory  
124 transduction, and non-canonical OSNs (Figure 2d). MVC\_eGFP cells expressed genes involved  
125 in the taste transduction pathway as expected for chemosensory epithelial cells of the olfactory  
126 epithelium (Ualiyeva et al., 2020). In contrast, OSN\_eGFP- expressed transcripts for markers of  
127 canonical OSNs such as *OMP*, *BBS1* and *2* and proteins involved in the canonical olfactory  
128 transduction pathway. The non-canonical OSNs considered here included guanylyl-cyclase D  
129 (GC-D) OSNs (Juilfs et al., 1997), *Trpc2* OSNs (Omura and Mombaerts, 2014) and *Cav2.1*  
130 OSNs (Pyrski et al., 2018). OSN\_eGFP- expressed low levels of *Cacna1a* encoding for *Cav2.1*  
131 and *Trpc2*. OSN\_eGFP- expressed higher levels of Trace amine-associated receptors (Liberles,  
132 2015) than MVC\_eGFP cells.

133  
134 Perusal of these top differences suggested that these are distinct chemosensory cell types found  
135 in the olfactory epithelium. In order to perform a thorough analysis of the differences between  
136 these chemosensory cell groups we performed an analysis of gene ontology (GO) enrichment for  
137 lists of genes related to chemosensory perception and neuronal identity. When compared with  
138 OSN\_eGFP- we found that MVC\_eGFP cells were enriched for transcripts belonging to gene  
139 ontologies of sensory perception of sweet/umami taste (GO:0050916 and GO:0050917) (Figure

140 2e, Figure 2 - figure supplement 2, Figure 2 - figure supplement 3) which includes taste  
141 detection/transduction proteins that have been reported to be expressed in MVCs (Genovese and  
142 Tizzano, 2018; Hegg et al., 2010): *Gnat3*, encoding for gustducin, the G protein mediating sweet  
143 and umami taste transduction (McLaughlin et al., 1992), *Itp3*, encoding for the inositol-1,4,5-  
144 triphosphate receptor type 3 and *Tas1r3*, encoding for a gustducin-coupled receptor involved in  
145 umami and sweet taste (Damak et al., 2003; Zhang et al., 2003). In contrast, OSN\_eGFP- were  
146 enriched for transcripts involved in events required for an organism to receive an olfactory  
147 stimulus, convert it to a molecular signal, and recognize and characterize the signal  
148 (GO:0007608). Finally, enrichment of gene ontology lists for synaptic vesicle function were  
149 decreased for MVC\_eGFP cells compared with OSN\_eGFP- cells (Figure 2e). Results of this  
150 gene ontology analysis of chemosensation and synaptic vesicle function reinforces the finding  
151 that the two cell groups in this study are distinct chemosensory cell types of the olfactory  
152 epithelium. OSN\_eGFP- cells differ from MVC\_eGFP cells in expression of olfactory receptors,  
153 chemosensation and transcripts related to synaptic function as expected for an OSN.

154

155 Finally, a question that arises is how the transcriptional profile of the MVC\_eGFP cells of this  
156 study compares to transcriptional profiling of chemosensory epithelial cells isolated from the  
157 respiratory and olfactory epithelia in mice expressing eGFP under control of the ChAT promoter  
158 (Ualiyeva et al., 2020). Figure 2 - figure supplement 4 shows comparisons of gene expression  
159 between MVC\_eGFP and OSN\_eGFP- cells of this study and ChAT-eGFP MVCs and ChAT-  
160 eGFP SCCs profiled in the respiratory epithelium in the study of Ualiyeva and co-workers  
161 (Ualiyeva et al., 2020). This comparison is of limited value due to the fact that gene profiling  
162 was performed in two separate studies. However, in this preliminary analysis we find that MVCs



163 from this study have similar transcription profiles to ChAT-eGFP MVCs and differ from ChAT-  
164 eGFP SCCs. For example, MVC\_eGFP and ChAT-eGFP MVCs showed enhanced expression of  
165 transcripts such as *Il25* and *Fos* (Figure 2 - figure supplement 3). The similarity of  
166 transcriptional profiling argues that in this study MVC\_eGFPs were not contaminated with SCCs  
167 consistent with the fact that in our study we isolated MVC\_eGFP from olfactory epithelium  
168 dissected apart from the respiratory epithelium and that the density of MVCs in the OE is higher  
169 than the density of SCCs in the respiratory epithelium (Ualiyeva et al., 2020) decreasing the  
170 chance of contamination of OE MVCs by SCCs. Interestingly, *Ugt2a1* and *Ugt2a2*, transcripts  
171 for proteins involved in UDP synthesis were higher in MVC\_eGFP than ChAT-eGFP MVCs  
172 suggesting differences between these cells (Figure 2 - figure supplement 3). In order to  
173 determine whether these similarities and differences between MVCs in our study and the study  
174 of Ualiyeva and co-workers are real it will be necessary to perform simultaneous RNAseq  
175 profiling of these two populations.

176  
177 **Gene ontology analysis finds enrichment of lists of viral-related, inflammation and immune**  
178 **transcripts in MVC\_eGFP cells.** SCCs, tuft and brush cells have been implicated in responses  
179 to bacterial and viral infection, immunity and inflammation (Luo et al., 2019; Maina et al., 2018;  
180 O'Leary et al., 2019; Perniss et al., 2020; Rane et al., 2019; Saunders et al., 2014; Tizzano et al.,  
181 2010; Ualiyeva et al., 2020). The fact that MVCs are closely related to these cells (Fu et al.,  
182 2018; Genovese and Tizzano, 2018; Ogura et al., 2011; Ualiyeva et al., 2020) lead  
183 us to search for gene ontology enrichment related to bacterial and viral infection, immunity and  
184 inflammation for MVC\_eGFP cells. We found robust enrichment of these gene ontologies in  
185 MVC\_eGFP cells (Figure 3a). Transcripts related to viral infection that were higher in

186 MVC\_eGFP cells compared to OSN\_eGFP- cells (Figure 3b) included those involved in viral  
187 entry into host cells, viral transcription and regulation of viral transcription, negative regulation  
188 of viral genome replication and negative regulation of viral process (Figure 2 – figure  
189 supplement 2). The majority of these genes were detected by Ualiyeva and colleagues (Ualiyeva  
190 et al., 2020) in their ChAT-GFP MVC population. We also found gene ontology enrichment in  
191 MVC\_eGFP cells compared to OSN\_eGFP- cells for defense response to bacterium (Figure 2 –  
192 figure supplement 2).

193  
194 Importantly, we also find enrichment for transcript expression for immunity and inflammation.  
195 Genes related to inflammation and immunity that were higher in MVC\_eGFP cells compared to  
196 OSN\_eGFP- cells are shown in Figure 3 – figure supplements 1-2. Among these transcripts *IL25*  
197 and its receptor *Il17rb* are enriched in MVC\_eGFP cells. In SCCs, brush cells and tuft cell  
198 generation of IL25 leads to a type 2 inflammation and stimulates chemosensory cell expansion in  
199 a sequence of events that also involves cysteinyl leukotrienes (Bankova et al., 2018; Luo et al.,  
200 2019; von Moltke et al., 2016). The presence of both *Il25* and *Il17rb* suggests an autocrine effect.  
201 Furthermore, both cell types displayed increased expression of transcripts encoding for enzymes  
202 involved in eicosanoid biosynthesis such as *Alox5*, *Ptgs1* and *Ptgs2* that are found in brush cells  
203 in the airways (Bankova et al., 2018) and tuft cells in the intestine (McGinty et al., 2020) where  
204 they drive type 2 immune responses.

205  
206 **Transcription profiling indicates that OSN\_eGFP+ cells are distinct from both**  
207 **OSN\_eGFP- and MVC\_eGFP cells.** Differential gene expression analysis of the RNAseq data  
208 was used to compare OSN\_eGFP+ individually with the other two groups of cells. We found that

209 expression of 2000 genes was significantly higher in OSN\_eGFP+ compared to OSN\_eGFP-,  
210 and expression of 1821 genes was lower in OSN\_eGFP+ cells (Figure 4 -figure supplement 1  
211 shows the results of RNAseq and Figure 4 -figure supplement 2 summarizes the data). Figure 4  
212 figure supplement 2a shows expression levels for the transcripts that showed the largest  
213 differences between OSN\_eGFP+ and OSN\_eGFP- cells. The transcripts for TRPM5 and eGFP  
214 were among the top 10 genes whose transcription was higher in OSN\_eGFP+ compared to  
215 OSN\_eGFP- with 105-fold and 42-fold increases respectively. However all of these 10 top  
216 genes, and many other genes that were found at significantly higher levels of expression in  
217 OSN\_eGFP+ cells compared to OSN\_eGFP- happen to be genes expressed at significantly  
218 higher levels in MVC\_eGFP cells (Figure 4 -figure supplement 3 shows the results of RNAseq  
219 for MVC\_eGFP vs OSN\_eGFP+). For example *Trpm5* is expressed at levels of 87.5, 9200 and  
220 127000 in OSN\_eGFP-, OSN\_eGFP+ and MVC\_eGFP cells respectively (Figure 4 -figure  
221 supplement 4). While the light scatter settings in the FACS were set to exclude doublets, this  
222 raised the question whether expression of these genes in the OSN\_eGFP+ pool was due to  
223 contamination of the OSN\_eGFP+ cell fraction (mCherry and eGFP positive) by doublets made  
224 up of one OSN\_eGFP- cell (mCherry positive and eGFP negative) and one MVC\_eGFP cell  
225 (mCherry negative and GFP positive).

226

227 In order to determine whether transcription profiling for the OSN\_eGFP+ cell fraction is  
228 consistent with this being a separate population we searched for genes whose expression levels  
229 were significantly higher in OSN\_eGFP+ compared to *both* OSN\_eGFP- and MVC\_eGFP.  
230 Figures 4a and 4b show the top genes that were expressed at significantly higher levels in  
231 OSN\_eGFP+ (and Figure 4 – figure supplement 5 shows data for all 80 genes). Among these

232 genes there were 22 olfactory receptor genes and one olfactory receptor pseudogene (Figure 4b,  
233 Figure 4c shows a volcano plot for Olfrs). A GOnet GO term enrichment analysis (Pomaznoy et  
234 al., 2018) of the 80 genes enriched in OSN\_eGFP+ compared to the other two groups (Figure 4 –  
235 figure supplement 6) revealed that these cells express genes involved in sensory perception of  
236 smell (GO:0007608), signal transduction (GO:0007165) and cellular response to stimulus  
237 (GO:0051716). Interestingly, two of these genes *Trpc2* (Omura and Mombaerts, 2014) and  
238 *Calb2* (Bastianelli et al., 1995) are expressed in small subsets of OSNs. Thus, this analysis  
239 indicates that OSN\_eGFP+ cells are distinct from the other two cell populations, although more  
240 detailed follow-up experiments are necessary to fully characterize this population including  
241 single cell RNA sequencing.

242

243 **Gender differences for expression of olfactory receptors.** We did not find major differences in  
244 transcriptome profiling between males and females for genes that were differentially expressed  
245 between the three cell groups (Figure 4 – figure supplement 7,8). We found a substantial number  
246 of olfactory receptor genes that were differentially expressed between males and females (Figure  
247 4 – figure supplement 8). Interestingly, *Trpc2*, that is one of the genes with higher expression in  
248 OSN\_eGFP+ cells is expressed in higher amounts in females. Surprisingly, the differentially  
249 expressed olfactory receptors differed from receptors identified by van der Linden et al. (van der  
250 Linden et al., 2018).

251

252 ***In situ* hybridization chain reaction finds strong TRPM5 mRNA expression in MVC\_eGFP**  
253 **cells, but not in the nuclear OSN layer.** Studies with regular *in situ* hybridization find  
254 expression of TRPM5 mRNA in MVCs, but not in the OSN nuclear layer (Pyrski et al., 2017;

255 Yamaguchi et al., 2014). Here we asked whether third generation in situ hybridization chain  
256 reaction version 3.0 (HCR v3.0) designed to provide high signal to noise ratio *in situ* signal  
257 (Choi et al., 2018) revealed TRPM5 mRNA expression in the nuclear OSN layer. These  
258 experiments were performed in TRPM5-GFP mice and in TRPM5-GFP mice crossed with  
259 TRPM5 knockouts (Clapp et al., 2006; Damak et al., 2006). Consistent with published results  
260 (Pyrski et al., 2017; Yamaguchi et al., 2014) we find strong *in situ* signal for TRPM5 in  
261 MVC\_eGFP cells located in the apical layer of the olfactory epithelium (Figure 5a, asterisks,  
262 also see Figure 5 – figure supplement 1 for a 3D rendering) and this signal is absent in  
263 MVC\_eGFP cells in the TRPM5 knockout (Figure 5b, asterisks). In addition, we find sparse  
264 TRPM5 *in situ* labeling in the nuclear OSN layer (Figure 5a, arrows), but similar sparse labeling  
265 was found in the OSN nuclear layer in the TRPM5 knockout (Figure 5b, arrows). Therefore, we  
266 find evidence for strong expression of TRPM5 mRNA in MVC\_eGFP cells, but we do not find  
267 evidence for expression of TRPM5 mRNA in OSNs.

268

269

270

271

272

273

274 **Discussion**

275

276 We performed transcriptional profiling of three chemosensory cells in the mouse olfactory  
277 epithelium: microvillous cells (MVC\_eGFP) and two types of olfactory sensory neurons:  
278 OSN\_eGFP+ and OSN\_eGFP-. We found that while the transcriptome of each of these cell types  
279 is distinct they share common features across groups. The two groups of OSNs share transcript  
280 expression for proteins expressed in OSNs such as OMP, olfactory transduction proteins, and  
281 proteins involved in synaptic function. Yet, they differ in olfactory receptor expression and  
282 OSN\_eGFP+ express transcripts encoding for proteins involved in chemosensory signal  
283 transduction and cellular response to stimulus. On the other hand, MVC\_eGFP cells express  
284 transcripts encoding for taste transduction proteins and other transcripts found in SCCs such as  
285 *Pou2f3* and *Il25* but they do not express transcripts for proteins involved in olfactory  
286 transduction and synaptic function, and they do not express olfactory receptors. Finally, we  
287 found that MVC\_eGFP cells express a substantial number of transcripts involved in viral  
288 infection, inflammation and immunity.

289

290 **Transcriptional profiling reveals a role of microvillous cells in viral infection and innate**

291 **immunity.** Gene ontology analysis revealed that MVC\_eGFP cells are enriched in viral-related  
292 transcripts compared to OSN\_eGFP- (Figure 3 and Figure 2 – figure supplement 2). GOnet GO  
293 term enrichment analysis (Pomaznoy et al., 2018) of all 133 immune genes enriched in  
294 MVC\_eGFP cells compared to OSN\_eGFP- (Figure 3 – figure supplement 2) revealed that  
295 MVCs express a substantial number of genes involved in the innate immune response  
296 (GO:0045087, 72 genes matched this list). Figure 6 depicts several mechanisms that could occur  
297 in MVC\_eGFP in response to viral infection. To infect cells, viruses must interact with host cell

298 membranes to trigger membrane fusion and viral entry. Membrane proteins at the surface of the  
299 host cell are thus key elements promoting or preventing viral infection. Here we find that  
300 transcripts for several membrane proteins and cell adhesion molecules involved in viral entry are  
301 enriched in MVC\_eGFP cells. *Plscr1* encodes a phospholipid scramblase which has been shown  
302 to promote herpes simplex virus (HSV) entry in human cervical or vaginal epithelial cells and  
303 keratinocytes (Cheshenko et al., 2018), and hepatitis C virus entry into hepatocytes (Gong et al.,  
304 2011). In contrast with its role in viral entry, PLSCR1 impairs the replication of other types of  
305 viruses in infected cells (influenza A virus (Luo et al., 2018), hepatitis B virus (Yang et al.,  
306 2012)). IFTM2 is another transmembrane protein that mediates viral entry. In contrast with  
307 PLSCR1, IFTM2 inhibits viral entry of human immunodeficiency virus (HIV, (Yu et al., 2015)),  
308 hepatitis C virus (Narayana et al., 2015), influenza A H1N1 virus, West Nile virus, and dengue  
309 virus (Brass et al., 2009). IFTM2 also inhibits viral replication (Brass et al., 2009) and protein  
310 synthesis (Lee et al., 2018). Nectins are transmembrane glycoproteins and constitute cell surface  
311 receptors for numerous viruses. There is wide evidence that HSV can enter host cells through  
312 Nectin-1 dependent mechanisms, particularly for neuronal entry (Kopp et al., 2009; Petermann et  
313 al., 2015; Sayers and Elliott, 2016; Shukla et al., 2012), and Nectin-4 appears essential for  
314 measles virus epithelial entry (Noyce and Richardson, 2012; Singh et al., 2015; Singh et al.,  
315 2016). In addition to cell surface molecules, the mucus contains secreted proteins that confer  
316 protection against viruses to the underlying cells. Glycoproteins are major constituents of mucus  
317 and exhibit multiple pathogens binding-sites. We found the *Ltf* transcript in MVC\_eGFP cells,  
318 which encodes for lactotransferrin. Lactotransferrin is a globular glycoprotein widely represented  
319 in the nasal mucus with anti-viral activity against Epstein-Barr virus (Zheng et al., 2014; Zheng  
320 et al., 2012), HSV (Shestakov et al., 2012; Valimaa et al., 2009)) and Hepatitis C virus (Allaire et

321 al., 2015). Finally, MVC\_eGFP cells express the murine norovirus (MNoV) receptor CD300LF.  
322 In the gut TRPM5-expressing tuft cells express high levels of CD300LF and mice were resistant  
323 to infection with MNoV<sup>CR6</sup> when tuft cells were absent or decreased, whereas viral titers were  
324 enhanced in any context where tuft cell numbers were increased, such as helminth infection or  
325 treatment with rIL-25 (Wilén et al., 2018).

326

327 Viruses have developed numerous strategies to overcome barrier mechanisms to enter the cells.  
328 After viral entry infected cells have other resources to fight against viral infection by disrupting  
329 the production of new viral particles, limiting inflammation processes and activating innate  
330 immune responses. For example, TRIM25, whose transcript is increased in MVC\_eGFP cells, is  
331 an ubiquitin ligase that activates retinoic acid-inducible gene I (RIG-I) to promote the antiviral  
332 interferon response (Gack et al., 2007). Furthermore, influenza A virus targets TRIM25 to evade  
333 recognition by the host cell (Gack et al., 2009). In addition, TRIM25 displays a nuclear role in  
334 restricting influenza A virus replication (Meyerson et al., 2017). Zc3h12a, also known as  
335 MCPIP-1, inhibits hepatitis B and C virus replication, reduces virus-induced inflammation (Li et  
336 al., 2020; Lin et al., 2014), and exerts antiviral effects against influenza A virus (Dong et al.,  
337 2017).

338

339 We show that MVC\_eGFP express *Gnat3*, *Plcg2* and *Itpr3*. This intracellular pathway would  
340 lead to calcium increase and opening of TRPM5, leading to a sodium influx and potential vesicle  
341 release. Among the list of inflammation genes enriched in MVC\_eGFP we find *Il25*, an  
342 interleukin that is involved in the type 2 inflammatory response of TRPM5-expressing epithelial  
343 cells in the airway epithelium and the gut (O'Leary et al., 2019; Ting and von Moltke, 2019).



344 Also, *Il25* expression in the skin leads to disruption of the epithelium and enhances HSV-1 and  
345 vaccinia virus replication (Kim et al., 2013). MVC\_eGFP cells are known to produce  
346 acetylcholine, which can activate sustentacular cells through M3 muscarinic acetylcholine  
347 receptors (Ogura et al., 2011). Sustentacular cells may in particular play a role in maintaining  
348 extracellular ionic gradients, extracellular glucose, secreting mucus, metabolizing noxious  
349 chemicals, and regulating cell turnover (Fu et al., 2018; Villar et al., 2017). In addition to *Il-25*,  
350 the expression of enzymes for eicosanoid biosynthesis (*Alox5*, *Ptgs1* and *Ptgs2*) suggests that  
351 MVC\_eGFP are likely to recruit group 2 innate lymphoid cells, similar to tuft cells in the small  
352 intestine (McGinty et al., 2020). Finally, the innate immune response involves recruitment of  
353 macrophages that are known to play a protective role in the olfactory epithelium (Borders et al.,  
354 2007). MVC\_eGFP express the G-protein coupled receptor GPR126/ADGRG6, which is  
355 required for macrophage recruitment and Schwann cells regeneration after peripheral nerve  
356 injury (Mogha et al., 2016). This raises the question whether MVC\_eGFP could play a protective  
357 role, promoting OSN survival and increasing neurogenesis, through macrophage recruitment. In  
358 addition, activation of MVCs by irritants, bacteria and viruses could result in activation of  
359 cytokine-induced inflammation and macrophage recruitment by long-term horizontal basal cells,  
360 that activate type 1 immune responses within the olfactory epithelium (Chen et al., 2019). All  
361 cytokines and interferons produced in the microenvironment of a MVC\_eGFP can then  
362 contribute to the activation of immune responses in neighboring MVC\_eGFP, since we found the  
363 expression of various cytokine receptors (*IL6ra*, *Il1rap*, *IL4ra*, *IL17re*, *IL17 rb*, *TNFRSF13B*)  
364 and interferons responsive elements (*Ifitms*) .

365

366 Our findings of expression of virally relevant transcripts in MVC\_eGFP cells complement  
367 published studies on the role of MVC-related SCCs in viral infection. In the trachea, viral-  
368 associated formyl peptides activate SCCs to release acetylcholine and activate mucociliary  
369 clearance by ciliated cells (Perniss et al., 2020). This activation is mediated by the TRPM5  
370 transduction pathway in the SCC and muscarinic acetylcholine receptors in the ciliated cell. In a  
371 similar manner in the olfactory epithelium MVCs respond to ATP, which is involved in  
372 activating mucociliary movement by releasing acetylcholine and activating adjacent  
373 sustentacular cells through a muscarinic receptor (Fu et al., 2018). Therefore, viral infection  
374 could result in activation of MVCs resulting in activation of mucociliary clearance by adjacent  
375 sustentacular cells.

376  
377 *Pou2f3* also called *Sknl1a*, encodes for a key regulator for the generation of TRPM5-expressing  
378 cells in various epithelial tissues (Yamashita et al., 2017). *Pou2f3* transcript was increased in  
379 MVC\_eGFP cells compared to OSN\_eGFP-. *Sknl1a/Pou2f3*-deficient mice lack intestinal tuft  
380 cells and have defective mucosal type 2 responses to helminth infection in the intestine (Gerbe et  
381 al., 2016). MVCs express markers of tuft cells (*Pou2f3*, *Trpm5* and others) indicating that MVCs  
382 share inflammatory and innate immune functions with tuft cells in the gut and SCCs and brush  
383 cells in the airways (Ting and von Moltke, 2019). In addition, in the anterior olfactory  
384 epithelium, where there is a higher density of MVCs, mice exposed to mild odorous irritants  
385 exhibited a time-dependent increase in apoptosis and a loss of mature OSNs without a significant  
386 increase in proliferation or neurogenesis (Lemons et al., 2020). Future experiments are necessary  
387 to determine whether activation of MVCs by viruses could lead to loss of mature OSNs  
388 contributing to smell loss after viral infection. Interestingly, in the mouse distal lung, where there

389 is no expression of SCCs, there was de novo generation of SCCs after infection with  
390 A/H1N1/PR/8 influenza virus (Rane et al., 2019) raising the question whether virus exposure  
391 could alter MVC number in the olfactory epithelium. Finally, in teleost fish rhabdoviruses induce  
392 apoptosis in a unique type of crypt OSN via the interaction of the OSN TrkA receptor with the  
393 viral glycoprotein and activates proinflammatory responses in the olfactory organ (Sepahi et al.,  
394 2019).

395

396 **Viral infection of the central nervous system through the olfactory epithelium.** The olfactory  
397 epithelium provides direct viral access to the brain through the olfactory nerve. Whether this  
398 olfactory path constitutes route of entry for viruses to the brain is a matter of intense discussion,  
399 especially because some viruses are postulated to be involved in encephalopathy and  
400 neurodegenerative disorders (Cairns et al., 2020; Dando et al., 2014; Doty, 2008; Harris and  
401 Harris, 2018). Our finding that MVC\_eGFP cells are enriched in virally-related genes suggests  
402 that these cells may be involved in or prevention of viral entry into the brain (and these two  
403 alternatives are not exclusive since they may be different for different viruses). On the one hand,  
404 we identified transcripts encoding for viral receptors in MVC\_eGFP, suggesting that viruses can  
405 enter these cells. It is not known whether viruses can spread in neighboring cells, but if viral  
406 particles were to enter the OSNs they could reach the olfactory bulb through anterograde  
407 transport along the olfactory nerve and from the olfactory bulb, viruses can spread throughout  
408 the brain along the olfactory bulb-hippocampus route. On the other hand, we found enrichment  
409 for transcripts encoding for proteins involved in limiting viral infection and promoting immune  
410 and anti-inflammatory responses in MVC\_eGFP cells. In this case, viral spread to the brain  
411 would be prevented. Finally, the olfactory epithelium is innervated by the trigeminal nerve, and

412 substance P immunostaining is closely associated with subsets of MVCs (Lin et al., 2008). This  
413 raises the question whether an interaction between MVCs and trigeminal nerve fibers could  
414 participate in local inflammation as found for SCCs (Saunders et al., 2014), and could modulate  
415 the entry of virus to the brain stem through the trigeminal nerve. Future experiments are  
416 necessary to study the potential role of MVC\_eGFP cells in viral infection of the olfactory  
417 epithelium and the brain.

418

419 **Are GFP-expressing OSNs in the TRPM5-GFP mouse a distinct set of OSNs?** Expression of  
420 TRPM5 in a subset of OSNs has been controversial. The original proposal of expression of  
421 TRPM5 in OSNs was motivated by expression of eGFP in adult TRPM5-eGFP transgenic mice  
422 and immunolabeling of the ciliary layer of the epithelium with an antibody (raised against the  
423 TRPM5 peptide RKEAQHKRQHLERDLPDLDQK) that was validated by lack of expression  
424 in TRPM5 knockout mice(Lin et al., 2007). However, staining in the ciliary layer with this  
425 antibody has not been replicated and our group and others subsequently showed knockout-  
426 validated TRPM5 staining of microvillous cells, and no labeling of the ciliary layer in the adult  
427 with antibodies raised against different TRPM5 protein peptides(Genovese and Tizzano, 2018;  
428 Gilbert et al., 2015; Lin et al., 2008; Pyrski et al., 2017). Interestingly, Pyrski and co-workers  
429 found TRPM5 immunolabeling in OSNs in the embryo, but not in the adult(Pyrski et al., 2017).  
430 Furthermore, in the adult mouse *in situ* hybridization has reported mRNA staining for TRPM5 in  
431 MVCs, and not in OSNs(Pyrski et al., 2017; Yamaguchi et al., 2014), and full length TRPM5  
432 mRNA was not found in OSNs in the adult(Pyrski et al., 2017).

433

434 Here we corroborate expression of eGFP in OSNs in TRPM5-eGFP transgenic mice. In addition,  
435 using HCR v3.0 we find strong expression of mRNA in MVCs, but we do not find evidence for  
436 expression of TRPM5 mRNA in OSNs (Figure 5). However, transcriptional analysis indicates  
437 that the OSN\_eGFP+ cell population differs in mRNA expression from the other two populations  
438 (Figure 4). OSN\_eGFP+ express a subset of olfactory receptors as well as transcripts encoding  
439 for proteins involved in chemosensory signal transduction and cellular response to stimulus. This  
440 is consistent with calcium imaging and loose patch recordings from adult TRPM5-eGFP  
441 transgenic mice that found that GFP-labeled cells with morphology resembling OSNs  
442 (presumably OSN\_eGFP+ cells) responded to pheromones and MHC peptides with currents that  
443 were abolished by pharmacologic inhibition of TRPM5 or isolation of cells from TRPM5  
444 knockouts(Lopez et al., 2014). In addition, studies of neuronal connectivity found that  
445 approximately half of the glomeruli innervated by GFP-bearing axons in the adult TRPM5-eGFP  
446 transgenic mouse are innervated by mitral cells that project directly to the medial amygdala,  
447 consistent with these glomeruli carrying pheromone information(Thompson et al., 2012).  
448 Nevertheless, these findings are in contrast with findings by Pyrksi and co-workers who show  
449 that in adult *Trpm5*-IRES-Cre x R26-GCaMP3 mouse OSNs that express GCaMP3 do not  
450 respond selectively to pheromones, and responded to general odorants(Pyrski et al., 2017). Why  
451 the functional studies of Lopez and co-workers and Pyrski and co-workers differ is not clear.  
452 However, eGFP-bearing OSNs in the *Trpm5*-IRES-Cre crossed with an eGFP reporter were  
453 expressed throughout the olfactory epithelium with no obvious spatial pattern (Pyrski et al.,  
454 2017) in contrast with the expression of eGFP in TRPM5-eGFP transgenics that is stronger in the  
455 lateral olfactory epithelium(Oshimoto et al., 2013). This raises the question whether eGFP is  
456 expressed in different OSNs in the *Trpm5*-IRES-Cre and TRPM5-eGFP transgenics. In

457 summary, our data indicate that OSN\_eGFP+ cells are a distinct population of chemosensory  
458 cells, but whether these are pheromone-responding OSNs requires future studies.  
459

460 **Would microvillous cells play a role in COVID-19?** Recently, due to the current COVID-19  
461 pandemic, researchers have focused their attention on investigating SARS-CoV-2 mechanism of  
462 entry into cells. SARS-CoV-2 targets mainly cells of the respiratory pathway where viral entry is  
463 mediated by ACE2 and TMPRSS2 (Hoffmann et al., 2020). Because numerous patients reported  
464 loss of smell (Giacomelli et al., 2020; Parma et al., 2020; Yan et al., 2020a; Yan et al., 2020b),  
465 researchers wondered about the mechanism for SARS-CoV-2 infection of the olfactory  
466 epithelium. In our study, we found the *Tmprss2* transcript was significantly increased in  
467 MVC\_eGFP cells compared to OSN\_eGFP- (Figure 3). We did not find *Ace2* enrichment in  
468 these cells, but this may be due to inefficiency in finding with RNAseq low abundance  
469 transcripts like *Ace2* (Ziegler et al., 2020). Transcriptional profiling of single cells in the  
470 olfactory epithelium from other laboratories found expression of transcripts for both *Tmprss2*  
471 and *Ace2* in sustentacular cells and stem cells, and at lower levels in MVCs (Brann et al.,  
472 2020; Fodouliau et al., 2020). Viral infection of sustentacular cells may explain loss of smell  
473 because these cells play a key role in supporting olfactory function by providing glucose for the  
474 energy necessary for olfactory transduction in the OSN cilia (Villar et al., 2017). Importantly,  
475 type I interferons, and to a lesser extent type II interferons induced by response of the host to  
476 SARS-CoV-2, and infection by other viruses inducing the interferon pathway increases *Ace2*  
477 expression in the nasal epithelium (Ziegler et al., 2020). MVCs may play a role in SARS-CoV-2  
478 infection of the olfactory epithelium because these cells may participate in activating  
479 inflammation of the epithelium that elicits type 1 immune response (Chen et al., 2019).

480

481 **Conclusion.** Here we find that microvillous cells of the olfactory epithelium express transcripts  
482 involved in immunity, inflammation and viral infection. These expression patterns suggest that,  
483 like tuft cells in the gut and SCCs and brush cells in the airways, the microvillous cells in the  
484 olfactory epithelium are involved in the innate immune response to viral infection. Our study  
485 provides new insights into a potential role for TRPM5-expressing cells in viral infection of the  
486 main olfactory epithelium.

487

488 **Abbreviations**

489 **COVID-19:** Coronavirus disease 2019

490 **DPI:** Days post infection

491 **eGFP:** Enhanced green fluorescent protein

492 **FACS:** Fluorescence-activated cell sorting

493 **FDR:** False discovery rate

494 **GLM:** Generalized linear model

495 **GO:** Gene ontology

496 **MVCs:** Microvillous cells

497 **OMP:** Olfactory marker protein

498 **OSNs:** Olfactory sensory neurons

499 **PSF:** Point spread function

500 **SARS-CoV-2:** Severe acute respiratory syndrome coronavirus clade 2

501 **SSC:** Saline-sodium citrate

502 **SSCT:** SSC with tween

503 **TRPM5:** Transient receptor potential cation channel subfamily M member 5



504 **Methods**

505 **Key Resources Table**

| <b>REAGENT TYPE</b>       | <b>REAGENT or RESOURCE</b>                    | <b>SOURCE</b>                              | <b>IDENTIFIER</b> | <b>ADDITIONAL INFORMATION</b>                        |
|---------------------------|-----------------------------------------------|--------------------------------------------|-------------------|------------------------------------------------------|
| Chemical compound, drug   | BrainPhys Neuronal Medium                     | Stemcell Technologies                      |                   | Product # 05791                                      |
| Chemical compound, drug   | Dispase II                                    | Sigma                                      |                   | Product # D4693                                      |
| Chemical compound, drug   | AcGFP1/eGFP calibration beads                 | Takara                                     |                   | Flow cytometry calibration beads<br>Product # 632594 |
| Chemical compound, drug   | mCherry calibration beads                     | Takara                                     |                   | Flow cytometry calibration beads<br>Product # 632595 |
| Chemical compound, drug   | RQ1 RNase-free DNase                          | Promega                                    |                   | Product # M6101                                      |
| Chemical compound, drug   | Papain                                        | Sigma                                      |                   | Product # P3125                                      |
| Chemical compound, drug   | Paraformaldehyde (32%)                        | Electron Microscopy Sciences               |                   | Product # 157145                                     |
| Chemical compound, drug   | RNAprotect Tissue Reagent                     | Qiagen                                     |                   | Product # 76526                                      |
| Chemical compound, drug   | RNeasy Plus Micro Kit                         | Qiagen                                     |                   | Product # 74034                                      |
| Chemical compound, drug   | High Capacity c-DNA Reverse Transcription kit | ABI                                        |                   |                                                      |
| Chemical compound, drug   | 18s rRNA                                      | PE ABI                                     |                   |                                                      |
| Strain, strain background | TRPM5-eGFP                                    | Dr. Robert Margolskee (Clapp et al., 2006) |                   |                                                      |
| Strain, strain background | TRPM5 knockout                                | Dr. Robert Margolskee {Damak, 2006 #1567}  |                   |                                                      |
| Strain, strain background | OMP-H2B::Cherry                               | Generated for this publication             |                   | This mouse will be deposited in Jackson Laboratories |
| Software, algorithm       | MATLAB_R2018a                                 | Mathworks                                  | RRID: SCR_001622  |                                                      |

|                     |                                              |                                                                                                                                                                   |                  |                      |
|---------------------|----------------------------------------------|-------------------------------------------------------------------------------------------------------------------------------------------------------------------|------------------|----------------------|
| Software, algorithm | Illustrator                                  | Adobe                                                                                                                                                             | RRID: SCR_010279 |                      |
| Software, algorithm | Photoshop                                    | Adobe                                                                                                                                                             | RRID: SCR_014199 |                      |
| Software, algorithm | InDesign                                     | Adobe                                                                                                                                                             |                  |                      |
| Software, algorithm | MoFlo Astrios Summit Software (6.3.1.16945). | Beckman Coulter                                                                                                                                                   |                  |                      |
| Software, algorithm | BBMap (BBDuk)                                |                                                                                                                                                                   | RRID:SCR_016968  |                      |
| Software, algorithm | Salmon v1.2.1                                | <a href="https://combine-lab.github.io/salmon/">https://combine-lab.github.io/salmon/</a>                                                                         | RRID:SCR_017036  | (Patro et al., 2017) |
| Software, algorithm | DeSEQ2 v1.28.0                               | bioconductor.org<br><a href="https://bioconductor.org/packages/release/bioc/html/DESeq2.html">https://bioconductor.org/packages/release/bioc/html/DESeq2.html</a> | RRID:SCR_015687  | (Love et al., 2014)  |
| Software, algorithm | TopGO, v2.40.0                               |                                                                                                                                                                   | RRID:SCR_014798  |                      |
| Software, algorithm | pHeatmap, 1.0.12                             |                                                                                                                                                                   | RRID:SCR_016418  |                      |
| Software, algorithm | Ensembl GRCm38, v99                          |                                                                                                                                                                   |                  |                      |
| Software, algorithm | R, v4.0                                      |                                                                                                                                                                   | RRID:SCR_001905  |                      |
| Software, algorithm | Tximport, v1.16.0                            |                                                                                                                                                                   | RRID:SCR_016752  |                      |
| Software, algorithm | SAMtools                                     | SAMtools<br><a href="http://samtools.sourceforge.net/">http://samtools.sourceforge.net/</a>                                                                       | RRID:SCR_002105  | (Li et al., 2009)    |
| Software, algorithm | Bedtools                                     |                                                                                                                                                                   | RRID:SCR_006646  |                      |
| Software, algorithm | STAR v2.5.3a                                 | <a href="https://github.com/alexdobin/STAR">https://github.com/alexdobin/STAR</a>                                                                                 | RRID:SCR_015899  |                      |
| Software, algorithm | Sigmaplot, v12.5                             | Systat Software                                                                                                                                                   | RRID:SCR_003210  |                      |
| Software, algorithm | Custom code for bioinformatics analysis      | <a href="https://github.com/eric-d-larson/OE_TRPM5">https://github.com/eric-d-larson/OE_TRPM5</a>                                                                 |                  |                      |
| Software, algorithm | OPM                                          | <a href="https://github.com/qi2lab/opm">https://github.com/qi2lab/opm</a>                                                                                         |                  |                      |

506

507 **Overview of the method for transcriptional profiling of low abundance cell populations.** For  
508 transcriptional profiling of TRPM5-bearing MVC\_eGFP cells and OSN\_eGFP+ cells that  
509 constitute a small fraction of the cells in the epithelium, we used FACS to separate the cell  
510 populations targeted for RNAseq (Amamoto et al., 2019). In our experiments, we isolated the  
511 cells from mice that expressed fluorescent marker proteins appropriate for cell sorting. OSNs  
512 were expressing mCherry under the control of OMP promoter. eGFP was expressed in MVCs  
513 and a subset of OSNs (OSN\_eGFP+ cells) under control of the TRPM5 promoter.

514

515 **Generation of OMP-H2B::Cherry mice.** A PacI cassette containing PacI-H2B::mCherry-pA  
516 PGK-puro-pA-PacI was inserted into an OMP gene-targeting vector (pPM9)(Mombaerts et  
517 al., 1996), which replaces the OMP coding sequence with the PacI cassette and expresses a  
518 H2B::mCherry fusion protein. Animals are maintained in a mixed 129/B6 background.

519

520 **Animals.** Mice with TRPM5-driven eGFP expression (Clapp et al.,2006) were crossed with  
521 OMP-H2B::Cherry mice. The TRPM5-eGFP mice and TRPM5 knockout mice(Damak et al.,  
522 2006) were obtained with written informed consent from Dr. Robert Margolskee. Lines were  
523 maintained separately as homozygous and backcrossed regularly. Experiments were performed  
524 on mice from the F1 generation cross of TRPM5-eGFP and OMP-H2B::Cherry mice (OMP-  
525 H2B::mCherry/TRPM5-eGFP). PCR was used to verify genotype of experimental mice for eGFP  
526 and mCherry expression. Both male and female mice were used for experiments with ages  
527 ranging from 3- 8 months. Estrous and cage mate information was collected for all female mice  
528 in conjunction with experimental use. Mice were housed in passive air exchange caging under a  
529 12:12 light/dark cycle and were given food and water *ad libitum*. Mice were housed in the

530 National Institutes of Health approved Center for Comparative Medicine at the University of  
531 Colorado Anschutz Medical Campus. All procedures were performed in compliance with  
532 University of Colorado Anschutz Medical Campus Institutional Animal Care and Use  
533 Committee (IACUC) that reviews the ethics of animal use.

534  
535 In our vivarium we have ventilated cages (HV cages) where air is mechanically exchanged with  
536 fresh air once every minute and static cages (LV cages) where air is exchanged passively through  
537 a filter in the cover. When we moved the OMP-H2B::mCherry/TRPM5-eGFP to HV cages we  
538 noticed a decrease in the number of OSN\_eGFP+ cells sorted per mouse (Figure 1-figure  
539 supplement 1a,b and c), suggesting that changes in ventilation conditions affect TRPM5  
540 promoter-driven expression of eGFP. Following this observation, mice were moved back to LV  
541 cages. We proceeded to study the dependence of the number of OSN\_eGFP+ cells sorted on the  
542 number of days in LV vs. HV cages. The number of OSN\_eGFP+ cells is positively correlated  
543 with the number of days the animal spends in LV cages (Figure 1 – figure supplement 1d) and  
544 negatively correlated to the number of days the animals spend in the HV cages (Figure 1 – figure  
545 supplement 1e). Generalized linear model (GLM) analysis found significant differences for the  
546 number of OSN\_eGFP+ cells sorted as a function of the number of days in LV cages ( $p < 0.05$ , 26  
547 observations, 24 d.f., F-statistic = 5.64, p-value for GLM  $< 0.05$ ) and the number of days in HV  
548 cages ( $p < 0.05$ , 26 observations, 24 d.f., F-statistic = 5.99, p-value for GLM  $< 0.05$ ). For RNAseq  
549 experiments one FACS sort was done using cells from mice born and maintained in HV housing,  
550 and the OSN\_eGFP+ yield was low. Subsequently, we performed all FACS with cells isolated  
551 from the olfactory epithelium of mice raised in LV cages.

552

553 **Tissue dissociation of the olfactory epithelium.** Following euthanasia via CO<sub>2</sub> inhalation, the  
554 olfactory epithelium was immediately removed from the nasal cavity and epithelial tissue was  
555 separated from the bone in the turbinates. Care was taken not to include respiratory epithelium.  
556 The epithelium was dissociated enzymatically with Dispase II (2 mg/ml ) diluted in Ringer's  
557 solution ( 145mM NaCl, 5mM KCL, 20mM HEPES, 1mM MgCL<sub>2</sub>, 1mM CaCl<sub>2</sub>, 1mM Ny-  
558 Pyruvate, 5mM Glucose) (~25 minutes at 37<sup>0</sup>C) followed by an incubation in a papain plus  
559 Ca/Mg<sup>++</sup> free Ringer's solution (Ca/Mg<sup>++</sup> free Ringer's: 145mM NaCl, 5mM KCL, 20mM  
560 HEPES, 1mM Ny-Pyruvate, 1mM EDTA , L-cysteine: 1mg L-cysteine /1.5mL Ca/Mg<sup>++</sup> free  
561 Ringer's, Papain:1-3ul/1mL Ca/Mg<sup>++</sup> free Ringer's), for ~40-45 minutes at 37<sup>0</sup>C. Following  
562 incubation, DNase I (Promega) at 0.05U/μl and RNase free 10x Reaction buffer (1:20) were  
563 added to solution and the tissue was gently triturated using a ~1mm opening pipette. Isolated  
564 OSNs were collected from supernatants via centrifugation and resuspended in cell sorting  
565 medium of 1x PBS (diluted from commercial 10x PBS, pH 7.4 ) and BrainPhys Neuronal  
566 Medium (Stemcell Technologies). Initially, isolated cells were examined with a confocal  
567 microscope to confirm efficacy of dissociation methods, and examine cell types and  
568 fluorescence. For RNAseq, cells were strained through a 40 μm cell strainer and kept on ice until  
569 sorted via flow cytometry.

570

571 **Flow cytometry.** Fluorescence activated cell sorting was performed in the University of  
572 Colorado Cancer Center Flow Cytometry Core on a Beckman Coulter MoFlo Astrios EQ using  
573 MoFlo Astrios Summit Software (6.3.1.16945). eGFP signal was detected using a 488 nm laser  
574 and a bandpass 526/52nm collection filter. mCherry signal was detected using a 561 nm laser  
575 and a bandpass 614/20 nm collection filter. The 488nm laser was also used to detect light

576 scatter. The threshold was set at 3%. Gating was set to exclude doublets and optimized as cell  
577 populations emerged based on fluorescent markers. Flow cytometry calibration beads for  
578 AcGFP1/eGFP and mCherry (Takara, 632594, 632595) were used as fluorescence intensity  
579 controls. Olfactory epithelium cell suspensions from wild type and OMP-H2B::Cherry mice or  
580 TRPM5-eGFP mice were sorted as controls for auto fluorescence for eGFP and mCherry  
581 populations respectively. Cells were sorted into RNeasy Protect Tissue Reagent (Qiagen).

582

583 **RNA-extraction.** Total RNA was extracted from sorted, pooled cells from each cell population  
584 using the RNeasy Plus Micro Kit (Qiagen) according to the manufacturer's recommended  
585 protocol.

586

587 **RT-qPCR.** Quantitative reverse transcription polymerase chain reaction (RT-qPCR) was used to  
588 assess and confirm identities of cell types from each of the sorted cell populations. Following  
589 total RNA extraction, RT-qPCR was performed in the PCR core at University of Colorado  
590 Anschutz Medical Campus for the following markers: OMP, TRPM5, eGFP and ChAT. Primers  
591 and probes used for eGFP, TRPM5 and OMP were described in (Oshimoto et al., 2013).

592 Predesigned primers and probes for ChAT were purchased from Life Technologies. The mRNA  
593 for these targets was measured by RT-qPCR using ABI QuantStudio 7 flex Sequence detector.

594 1µg total RNA was used to synthesize cDNA using the High Capacity c-DNA Reverse

595 Transcription kit (ABI-P/N 4368814). cDNA was diluted 1: 2 before PCR amplification.

596

597 The TaqMan probes were 5' labeled with 6-carboxyfluorescein (FAM). Real time PCR reactions  
598 were carried out in MicroAmp optical tubes (PE ABI) in a 25 µl mix containing 8 % glycerol,

599 1X TaqMan buffer A ( 500 mM KCl, 100 mM Tris-HCl, 0.1 M EDTA, 600 nM passive  
600 reference dye ROX, pH 8.3 at room temperature), 300  $\mu$ M each of dATP, dGTP, dCTP and 600  
601  $\mu$ M dUTP, 5.5 mM MgCl<sub>2</sub>, 1X primer-probe mix, 1.25 U AmpliTaq Gold DNA and 5  $\mu$ l  
602 template cDNA. Thermal cycling conditions were as follows: Initiation was performed at 50°C  
603 for 2 min followed by activation of TaqGold at 95°C for 10 min. Subsequently 40 cycles of  
604 amplification were performed at 95°C for 15 secs and 60°C for 1 min. Experiments were  
605 performed with duplicates for each data point. Each PCR run included the standard curve (10  
606 fold serially diluted pooled cDNA from control and experimental samples), test samples, no-  
607 template and NORT controls. The standard curve was then used to calculate the relative  
608 amounts of targets in test samples. Quantities of targets in test samples were normalized to the  
609 corresponding 18s rRNA (PE ABI, P/N 4308310).

610

611 **RNA sequencing and pre-processing.** RNA quality control, library preparation, and sequencing  
612 were performed at the University of Colorado Genomics and Microarray core. Extracted RNA  
613 was used as the input for the Nugen Universal Plus mRNA-seq kit (Redwood City, CA) to build  
614 stranded sequencing libraries. Indexed libraries were sequenced using an Illumina  
615 NovaSEQ6000. Library preparation and sequencing was performed in two batches, separated by  
616 gender. 11 female samples were sequenced with an average depth of 37.3 million +/- SD of 6.5  
617 million read pairs, and 25 male samples were sequenced with an average depth of 34.8 million  
618 +/- SD of 3.5 million read pairs. Metadata for the samples submitted are shown in Figure 2 -  
619 figure supplement 3. Raw BCL files were demultiplexed and converted to FASTQ format.  
620 Trimming, filtering, and adapter contamination removal was performed using BBduk  
621 (Bushnell).

622

623 **RNA Sequencing Analysis.** Transcript abundance was quantified from trimmed and filtered  
624 FASTQ files using Salmon v1.2.1(Patro et al., 2017) and a customized Ensembl GRCm38  
625 (release 99) transcriptome (Zerbino et al., 2018). A customized version of the transcriptome was  
626 prepared by appending FASTA sequences of eGFP and mCherry to the GRCm38 FASTA file.  
627 The corresponding gene transfer format (GTF) file was modified accordingly to incorporate the  
628 new transcripts. Transcript abundance was summarized at the gene level using the TxImport  
629 (Soneson et al., 2015) package in R. Differential gene expression was quantified using DESeq2  
630 (Love et al., 2014) with default parameters after removing genes with an average count of < 5  
631 reads in each group. Significance was determined by FDR-adjusted p-value < 0.05. TopGO was  
632 used for gene ontology analysis (Alexa and Rahnenfuhrer, 2020). The input to TopGO was a list  
633 of significant DEGs and a list of all detected genes in the dataset. Enrichment was calculated by  
634 dividing the number of detected genes by the number of expected genes within each ontology of  
635 the TopGO output. To make the bar graphs in Figures 4 and 5, enrichment scores of  
636 downregulated GO terms were multiplied by -1 for visualization. Heatmap visualization was  
637 performed using *pHeatmap* in R (Kolde, 2019).

638

### 639 **RNA-sequence data comparison with Ualiyeva et al 2020**

640 Raw counts for this study and for Ualiyeva et al (GEO GSE139014)(Ualiyeva et al., 2020) were  
641 converted to  $\log_{10}(\text{reads per million (RPM)} + 1)$ . These RPM values were used to generate  
642 heatmaps to show the expression values of specific transcripts. No quantitative assessment was  
643 performed between the two studies.

644



645

646 **Tissue Preparation for Fluorescence Microscopy and *in situ*.** For euthanasia, mice were  
647 anesthetized with ketamine/xylazine (20–100  $\mu$ g/g of body weight), perfused transcardially with  
648 0.1 M phosphate buffer (PBS) followed by a PBS-buffered fixative (EMS 32%  
649 Paraformaldehyde aqueous solution diluted to 4% with 1x PBS) . The nose was harvested and  
650 postfixed for 12 h before being transferred for cryoprotection into PBS with 20% sucrose  
651 overnight. The olfactory epithelium was cryosectioned coronally into 16  $\mu$ m -thick sections  
652 mounted on Superfrost Plus slides (VWR, West Chester, PA) coated with poly-D-lysine.

653

654 ***In situ* followed by immunohistochemistry (IHC).** *In situ* hybridization was performed with  
655 the hybridization chain reaction method (Choi et al., 2018) using HCR v3.0 Probe Sets,  
656 Amplifiers, and Buffers from Molecular Instruments, Inc. Frozen slides were allowed to thaw  
657 and dry, baked at 60°C for 1 hour, then immersed in 70% ethanol overnight at 4°C, and allowed  
658 to dry again completely. Slides were inverted and placed on a Plexiglas platform inside a  
659 humidified chamber; subsequent steps were performed using this setup. Slides were incubated in  
660 10  $\mu$ g/ $\mu$ l proteinase K for 15 minutes at 37°C, then pre-hybridized with HCR hybridization  
661 buffer (30% formamide buffer from Molecular Instruments) for 30 minutes at 37°C. *Trpm5-B3*  
662 probes and *OMP-B2* probes (0.8 pmol of each probe in 100  $\mu$ l HCR hybridization buffer per  
663 slide) were added, and slides were hybridized overnight at 37°C. Slides were briefly incubated in  
664 undiluted HCR Wash Buffer (30% formamide buffer from Molecular Instruments) for 20  
665 minutes at 37°C. Excess probes were removed by incubating slides for 20 minutes each at 37°C  
666 in solutions of 75% HCR Wash Buffer / 25% SSCT (5X SSC, 0.1% Tween, diluted in RNase  
667 free water), 50% Buffer / 50% SSCT, 25% Buffer / 75% SSCT, and 100% SSCT. Slides were

668 incubated in 100% SSCT at room temperature for 20 minutes, then in Amplification Buffer  
669 (Molecular Instruments) at room temperature for 1 hour. B3 hairpins labeled with Alexa Fluor  
670 647 and B2 hairpins labeled with Alexa Fluor 546 were prepared (12 pmol of each hairpin were  
671 heat shocked, then cooled for 30 minutes, and added to 200µl of Amplification Buffer) added to  
672 slides, and incubated overnight at room temperature. Excess hairpins were removed with four  
673 washes (20 minutes) in SSCT at room temperature. Slides were then processed with IHC  
674 protocol to stain for GFP. At room temperature, tissue was permeabilized with Triton X-100  
675 0.1% in PBS for 30 minutes, washed three times with PBS, blocked with Donkey serum 5% and  
676 Tween 20 0.3% in PBS for 1 hour, incubated with Chicken anti-GFP primary antibody (1:500 in  
677 blocking solution, AB\_2307313 Aves labs) overnight, washed three times with PBS and  
678 incubated with Donkey anti-Chicken secondary antibody conjugated with alexa fluor 488 (1:500  
679 in blocking solution, 703-545-155 Jackson ImmunoResearch laboratories).After three final  
680 washes with PBS, slides were mounted using Fluoromount-G™ mounting medium with DAPI  
681 (Thermo Fisher Scientific).

682

683 **Confocal fluorescence microscopy.** Microscopy was performed with confocal microscopes  
684 (Leica SP8, Nikon A1R or 3i Marianas).

685

686 **Three-dimensional tissue imaging.** For three-dimensional imaging, a high numerical aperture  
687 (NA) oblique plane microscope was used (Dunsby, 2008; Sapoznik et al., 2020). Briefly, this  
688 variant on a light sheet microscope only uses one objective to interface with the sample. The  
689 sample is illuminated from the epi-direction using an obliquely launched light sheet. Emitted  
690 fluorescence is detected through the same primary objective used for illumination. A secondary

691 and tertiary objective optically resample the emitted fluorescence to image the fluorescence  
692 resulting from the obliquely launched light sheet onto a detector(Dunsby, 2008; Sapoznik et al.,  
693 2020). For the primary, secondary, and tertiary objectives we used a high-NA silicone immersion  
694 objective (Nikon  $\times 100$  NA 1.35, 0.28–0.31 mm working distance), a high-NA air immersion  
695 objective (Nikon  $\times 40$  NA 0.95, 0.25–0.16 mm working distance), and a bespoke glass-tipped  
696 objective (AMS-AGY v1.0, NA 1.0, 0 mm working distance), respectively. Images were  
697 acquired by a high-speed scientific CMOS camera (Photometrics Prime BSI) using custom  
698 Python software ((Sapoznik et al., 2020), <https://github.com/qi2lab/opm>).

699 The obliquely launched light sheet was set to 30 degrees above the coverslip. The sample was  
700 translated in one lateral dimension (x) at a constant speed by a scan optimized stage. The scan  
701 speed was set so that images with a 5-millisecond exposure time were acquired at 200 nm  
702 spacing over a distance of 5.5 mm. This constant speed scan was performed for the same  
703 volume, cycling through three excitation wavelengths (405, 488, 635 nm) and three sample  
704 height positions (z), with 20% overlap. Once the cycle of wavelengths and height positions  
705 completed, the sample was then laterally displaced (y), again with a 20% overlap, and the scan  
706 was repeated over a 5.5 mm x 5.5 mm x .035 mm (x,y,z) imaging volume. Raw data was  
707 orthogonally deskewed, stitched, and fused using custom Python code and BigStitcher(Hörl et  
708 al., 2019). After export, each inset image was deconvolved using Microvolution and measured  
709 point spread functions.

710

711 **Statistical analysis.** Statistical analysis was performed in Matlab (Mathworks, USA). Statistical  
712 significance was estimated using a generalized linear model (GLM), with post-hoc tests for all  
713 data pairs corrected for multiple comparisons using false discovery rate (Curran-Everett, 2000).

714 The post hoc comparisons between pairs of data were performed either with a t-test, or a  
715 ranksum test, depending on the result of an Anderson-Darling test of normality. 95% CIs shown  
716 in the figures as vertical black lines or shading bounding the lines were estimated by bootstrap  
717 analysis of the mean by sampling with replacement 1000 times using the bootci function in  
718 MATLAB.

719

720

721

722 **Declarations**

723

724 **Ethics approvals.** Mouse experiments were carried out under guidelines of the National  
725 Institutes of Health in compliance with University of Colorado Anschutz Medical Campus  
726 Institutional Animal Care and Use Committee (IACUC).

727

728 **Consent for publication.** Not applicable.

729

730 **Availability of data and materials.** All data sequencing data are available in NCBI SRA  
731 <https://www.ncbi.nlm.nih.gov/sra/PRJNA632936>. The code used for bioinformatics analysis is  
732 found in [https://github.com/eric-d-larson/OE\\_TRPM5](https://github.com/eric-d-larson/OE_TRPM5)

733

734 **Competing interests.** The authors declare no competing interests.

735

736 **Funding.** This work was supported by NIDCD DC014253 and NIA DC014253-04S1 (DR), by  
737 the RNA Bioscience Initiative of the University of Colorado Anschutz Medical Campus (DS and  
738 DR) and by NIDCD R21DC018864 (EDL). A Starr Stem Cell Grant (JA, AKH and PF)  
739 supported the production and characterization of the OMP-H2B::mCherry mouse strain. The  
740 funding bodies had no role in the experimental design or collection, analysis and interpretation of  
741 data or in writing the manuscript.

742

743 **Authors' contributions.** D.R., B.D.B., M.N. and V.R. conceptualized the project. B.D.B.  
744 performed FACS, qPCR and RNAseq experiments. E.D.L. performed genomic analysis. P.F.

745 generated the OMP-H2B::Cherry mice. D.S. designed and analyzed in situ experiments. M.N.,  
746 A.N.B. and C.N. designed experiments. C.N. and J.H.Jr. performed experiments. M.L.  
747 performed in situ experiments and literature search and wrote the section on viral infection in the  
748 discussion. All authors contributed to writing and editing the manuscript.

749

750 ***Acknowledgements:*** We would like to acknowledge the support of Nicole Arevalo for laboratory  
751 support, Jerome Artus and Anna-Katerina Hadjantonakis for the construction of the targeting  
752 vector and production of OMP-H2B::Cherry mice, Emily Liman for providing TRPM5 and  
753 TRPC2 antibody and Catherine Dulac for providing tissue from TRPC2 knockouts.

754

755 **References**

756 Alexa, A., and Rahnenfuhrer, J. (2020). topGO: Enrichment Analysis for Gene Ontology (R  
757 Package).

758 Allaire, A., Picard-Jean, F., and Bisaillon, M. (2015). Immunofluorescence to Monitor the  
759 Cellular Uptake of Human Lactoferrin and its Associated Antiviral Activity Against the Hepatitis  
760 C Virus. *J Vis Exp*, 53053.

761 Amamoto, R., Garcia, M.D., West, E.R., Choi, J., Lapan, S.W., Lane, E.A., Perrimon, N., and  
762 Cepko, C.L. (2019). Probe-Seq enables transcriptional profiling of specific cell types from  
763 heterogeneous tissue by RNA-based isolation. *Elife* 8, e51452.

764 Bankova, L.G., Dwyer, D.F., Yoshimoto, E., Ualiyeva, S., McGinty, J.W., Raff, H., von Moltke,  
765 J., Kanaoka, Y., Frank Austen, K., and Barrett, N.A. (2018). The cysteinyl leukotriene 3 receptor  
766 regulates expansion of IL-25-producing airway brush cells leading to type 2 inflammation. *Sci*  
767 *Immunol* 3, eaat9453.

768 Bastianelli, E., Polans, A.S., Hidaka, H., and Pochet, R. (1995). Differential distribution of six  
769 calcium-binding proteins in the rat olfactory epithelium during postnatal development and  
770 adulthood. *Journal of Comparative Neurology* 354, 395-409.

771 Borders, A.S., Getchell, M.L., Etscheidt, J.T., van Rooijen, N., Cohen, D.A., and Getchell, T.V.  
772 (2007). Macrophage depletion in the murine olfactory epithelium leads to increased neuronal  
773 death and decreased neurogenesis. *Journal of Comparative Neurology* 501, 206-218.

774 Brann, D.H., Tsukahara, T., Weinreb, C., Lipovsek, M., Van den Berge, K., Gong, B., Chance,  
775 R., Macaulay, I.C., Chou, H.-J., Fletcher, R.B., *et al.* (2020). Non-neuronal expression of SARS-  
776 CoV-2 entry genes in the olfactory system suggests mechanisms underlying COVID-19-  
777 associated anosmia. *Science Advances* 6, eabc5801.

778 Brass, A.L., Huang, I.C., Benita, Y., John, S.P., Krishnan, M.N., Feeley, E.M., Ryan, B.J.,  
779 Weyer, J.L., van der Weyden, L., Fikrig, E., *et al.* (2009). The IFITM proteins mediate cellular  
780 resistance to influenza A H1N1 virus, West Nile virus, and dengue virus. *Cell* 139, 1243-1254.

781 Bushnell, B. BBMap (SourceForge).

782 Cairns, D.M., Rouleau, N., Parker, R.N., Walsh, K.G., Gehrke, L., and Kaplan, D.L. (2020). A  
783 3D human brain-like tissue model of herpes-induced Alzheimer's disease. *Science Advances* 6,  
784 eaay8828.

785 Chen, M., Reed, R.R., and Lane, A.P. (2019). Chronic Inflammation Directs an Olfactory Stem  
786 Cell Functional Switch from Neuroregeneration to Immune Defense. *Cell Stem Cell* 25, 501-513  
787 e505.



- 788 Cheshenko, N., Pierce, C., and Herold, B.C. (2018). Herpes simplex viruses activate  
789 phospholipid scramblase to redistribute phosphatidylserines and Akt to the outer leaflet of the  
790 plasma membrane and promote viral entry. *PLoS Pathog* *14*, e1006766.
- 791 Choi, H.M., Schwarzkopf, M., Fornace, M.E., Acharya, A., Artavanis, G., Stegmaier, J., Cunha,  
792 A., and Pierce, N.A. (2018). Third-generation in situ hybridization chain reaction: multiplexed,  
793 quantitative, sensitive, versatile, robust. *Development* *145*, dev165753.
- 794 Clapp, T.R., Medler, K.F., Damak, S., Margolskee, R.F., and Kinnamon, S.C. (2006). Mouse  
795 taste cells with G protein-coupled taste receptors lack voltage-gated calcium channels and  
796 SNAP-25. *BMC Biol* *4*, 7.
- 797 Curran-Everett, D. (2000). Multiple comparisons: philosophies and illustrations. *AmJPhysiol*  
798 *RegulIntegrComp Physiol* *279*, R1-R8.
- 799 Damak, S., Rong, M., Yasumatsu, K., Kokrashvili, Z., Perez, C.A., Shigemura, N., Yoshida, R.,  
800 Mosinger, B., Jr., Glendinning, J.I., Ninomiya, Y., *et al.* (2006). Trpm5 null mice respond to  
801 bitter, sweet, and umami compounds. *Chem Senses* *31*, 253-264.
- 802 Damak, S., Rong, M., Yasumatsu, K., Kokrashvili, Z., Varadarajan, V., Zou, S., Jiang, P.,  
803 Ninomiya, Y., and Margolskee, R.F. (2003). Detection of sweet and umami taste in the absence  
804 of taste receptor T1r3. *Science* *301*, 850-853.

- 805 Dando, S.J., Mackay-Sim, A., Norton, R., Currie, B.J., St John, J.A., Ekberg, J.A.K., Batzloff,  
806 M., Ulett, G.C., and Beacham, I.R. (2014). Pathogens Penetrating the Central Nervous System:  
807 Infection Pathways and the Cellular and Molecular Mechanisms of Invasion. *Clinical*  
808 *Microbiology Reviews* 27, 691-726.
- 809 Dong, C., Sun, X., Guan, Z., Zhang, M., and Duan, M. (2017). Modulation of influenza A virus  
810 replication by microRNA-9 through targeting MCP1. *J Med Virol* 89, 41-48.
- 811 Doty, R.L. (2008). The olfactory vector hypothesis of neurodegenerative disease: is it viable?  
812 *Ann Neurol* 63, 7-15.
- 813 Dunsby, C. (2008). Optically sectioned imaging by oblique plane microscopy. *Opt Express* 16,  
814 20306-20316.
- 815 Farbman, A.I., and Margolis, F.L. (1980). Olfactory marker protein during ontogeny:  
816 immunohistochemical localization. *Developmental biology* 74, 205-215.
- 817 Fischl, A.M., Heron, P.M., Stromberg, A.J., and McClintock, T.S. (2014). Activity-dependent  
818 genes in mouse olfactory sensory neurons. *Chem Senses* 39, 439-449.
- 819 Fodoulian, L., Tuberosa, J., Rossier, D., Landis, B.N., Carleton, A., and Rodriguez, I. (2020).  
820 SARS-CoV-2 receptor and entry genes are expressed by sustentacular cells in the human  
821 olfactory neuroepithelium. *bioRxiv*, 2020.2003.2031.013268.

- 822 Fu, Z., Ogura, T., Luo, W., and Lin, W. (2018). ATP and Odor Mixture Activate TRPM5-  
823 Expressing Microvillous Cells and Potentially Induce Acetylcholine Release to Enhance  
824 Supporting Cell Endocytosis in Mouse Main Olfactory Epithelium. *Front Cell Neurosci* 12, 71.
- 825 Gack, M.U., Albrecht, R.A., Urano, T., Inn, K.S., Huang, I.C., Carnero, E., Farzan, M., Inoue,  
826 S., Jung, J.U., and Garcia-Sastre, A. (2009). Influenza A virus NS1 targets the ubiquitin ligase  
827 TRIM25 to evade recognition by the host viral RNA sensor RIG-I. *Cell Host Microbe* 5, 439-  
828 449.
- 829 Gack, M.U., Shin, Y.C., Joo, C.H., Urano, T., Liang, C., Sun, L., Takeuchi, O., Akira, S., Chen,  
830 Z., Inoue, S., *et al.* (2007). TRIM25 RING-finger E3 ubiquitin ligase is essential for RIG-I-  
831 mediated antiviral activity. *Nature* 446, 916-920.
- 832 Genovese, F., and Tizzano, M. (2018). Microvillous cells in the olfactory epithelium express  
833 elements of the solitary chemosensory cell transduction signaling cascade. *PLoS One* 13,  
834 e0202754.
- 835 Gerbe, F., Sidot, E., Smyth, D.J., Ohmoto, M., Matsumoto, I., Dardalhon, V., Cesses, P.,  
836 Garnier, L., Pouzolles, M., Brulin, B., *et al.* (2016). Intestinal epithelial tuft cells initiate type 2  
837 mucosal immunity to helminth parasites. *Nature* 529, 226-230.
- 838 Giacomelli, A., Pezzati, L., Conti, F., Bernacchia, D., Siano, M., Oreni, L., Rusconi, S.,  
839 Gervasoni, C., Ridolfo, A.L., Rizzardini, G., *et al.* (2020). Self-reported olfactory and taste  
840 disorders in SARS-CoV-2 patients: a cross-sectional study. *Clin Infect Dis*.

- 841 Gilbert, M.A., Lin, B., Peterson, J., Jang, W., and Schwob, J.E. (2015). Neuregulin1 and ErbB  
842 expression in the uninjured and regenerating olfactory mucosa. *Gene Expression Patterns* *19*,  
843 108-119.
- 844 Gong, Q., Cheng, M., Chen, H., Liu, X., Si, Y., Yang, Y., Yuan, Y., Jin, C., Yang, W., He, F., *et*  
845 *al.* (2011). Phospholipid scramblase 1 mediates hepatitis C virus entry into host cells. *FEBS Lett*  
846 *585*, 2647-2652.
- 847 Harris, S.A., and Harris, E.A. (2018). Molecular Mechanisms for Herpes Simplex Virus Type 1  
848 Pathogenesis in Alzheimer's Disease. *Front Aging Neurosci* *10*, 48.
- 849 Hegg, C.C., Jia, C., Chick, W.S., Restrepo, D., and Hansen, A. (2010). Microvillous cells  
850 expressing IP3 receptor type 3 in the olfactory epithelium of mice. *Eur J Neurosci* *32*, 1632-  
851 1645.
- 852 Hoffmann, M., Kleine-Weber, H., Schroeder, S., Kruger, N., Herrler, T., Erichsen, S.,  
853 Schiergens, T.S., Herrler, G., Wu, N.H., Nitsche, A., *et al.* (2020). SARS-CoV-2 Cell Entry  
854 Depends on ACE2 and TMPRSS2 and Is Blocked by a Clinically Proven Protease Inhibitor. *Cell*  
855 *181*, 271-280 e278.
- 856 Hörl, D., Rojas Rusak, F., Preusser, F., Tillberg, P., Randel, N., Chhetri, R.K., Cardona, A.,  
857 Keller, P.J., Harz, H., Leonhardt, H., *et al.* (2019). BigStitcher: reconstructing high-resolution  
858 image datasets of cleared and expanded samples. *Nature methods* *16*, 870-874.

- 859 Juilfs, D.M., Fulle, H.J., Zhao, A.Z., Houslay, M.D., Garbers, D.L., and Beavo, J.A. (1997). A  
860 subset of olfactory neurons that selectively express cGMP-stimulated phosphodiesterase (PDE2)  
861 and guanylyl cyclase-D define a unique olfactory signal transduction pathway. *Proc Natl Acad*  
862 *Sci U S A* *94*, 3388-3395.
- 863 Kim, B.E., Bin, L., Ye, Y.M., Ramamoorthy, P., and Leung, D.Y.M. (2013). IL-25 enhances  
864 HSV-1 replication by inhibiting filaggrin expression, and acts synergistically with Th2 cytokines  
865 to enhance HSV-1 replication. *J Invest Dermatol* *133*, 2678-2685.
- 866 Kolde, R. (2019). pheatmap: Pretty Heatmaps ([cran.r-project.org](http://cran.r-project.org)).
- 867 Kopp, S.J., Banisadr, G., Glajch, K., Maurer, U.E., Grunewald, K., Miller, R.J., Osten, P., and  
868 Spear, P.G. (2009). Infection of neurons and encephalitis after intracranial inoculation of herpes  
869 simplex virus requires the entry receptor nectin-1. *Proc Natl Acad Sci U S A* *106*, 17916-17920.
- 870 Lee, W.J., Fu, R.M., Liang, C., and Sloan, R.D. (2018). IFITM proteins inhibit HIV-1 protein  
871 synthesis. *Sci Rep* *8*, 14551.
- 872 Lemons, K., Fu, Z., Aoude, I., Ogura, T., Sun, J., Chang, J., Mbonu, K., Matsumoto, I.,  
873 Arakawa, H., and Lin, W. (2017). Lack of TRPM5-Expressing Microvillous Cells in Mouse  
874 Main Olfactory Epithelium Leads to Impaired Odor-Evoked Responses and Olfactory-Guided  
875 Behavior in a Challenging Chemical Environment. *eNeuro* *4*.

- 876 Lemons, K., Fu, Z., Ogura, T., and Lin, W. (2020). TRPM5-expressing Microvillous Cells  
877 Regulate Region-specific Cell Proliferation and Apoptosis During Chemical Exposure.  
878 *Neuroscience* 434, 171-190.
- 879 Li, H., Handsaker, B., Wysoker, A., Fennell, T., Ruan, J., Homer, N., Marth, G., Abecasis, G.,  
880 Durbin, R., and Genome Project Data Processing, S. (2009). The Sequence Alignment/Map  
881 format and SAMtools. *Bioinformatics* 25, 2078-2079.
- 882 Li, M., Yang, J., Zhao, Y., Song, Y., Yin, S., Guo, J., Zhang, H., Wang, K., Wei, L., Li, S., *et al.*  
883 (2020). MCPIP1 inhibits Hepatitis B virus replication by destabilizing viral RNA and negatively  
884 regulates the virus-induced innate inflammatory responses. *Antiviral Res* 174, 104705.
- 885 Liberles, S.D. (2015). Trace amine-associated receptors: ligands, neural circuits, and behaviors.  
886 *Current opinion in neurobiology* 34, 1-7.
- 887 Lin, R.J., Chu, J.S., Chien, H.L., Tseng, C.H., Ko, P.C., Mei, Y.Y., Tang, W.C., Kao, Y.T.,  
888 Cheng, H.Y., Liang, Y.C., *et al.* (2014). MCPIP1 suppresses hepatitis C virus replication and  
889 negatively regulates virus-induced proinflammatory cytokine responses. *J Immunol* 193, 4159-  
890 4168.
- 891 Lin, W., Ezekwe, E.A., Jr., Zhao, Z., Liman, E.R., and Restrepo, D. (2008). TRPM5-expressing  
892 microvillous cells in the main olfactory epithelium. *BMC Neurosci* 9, 114.

- 893 Lin, W., Margolskee, R., Donnert, G., Hell, S.W., and Restrepo, D. (2007). Olfactory neurons  
894 expressing transient receptor potential channel M5 (TRPM5) are involved in sensing  
895 semiochemicals. *Proc Natl Acad Sci U S A* *104*, 2471-2476.
- 896 Lopez, F., Delgado, R., Lopez, R., Bacigalupo, J., and Restrepo, D. (2014). Transduction for  
897 Pheromones in the Main Olfactory Epithelium Is Mediated by the Ca<sup>2+</sup>-Activated Channel  
898 TRPM5. *J Neurosci* *34*, 3268-3278.
- 899 Love, M.I., Huber, W., and Anders, S. (2014). Moderated estimation of fold change and  
900 dispersion for RNA-seq data with DESeq2. *Genome Biol* *15*, 550.
- 901 Luo, W., Zhang, J., Liang, L., Wang, G., Li, Q., Zhu, P., Zhou, Y., Li, J., Zhao, Y., Sun, N., *et al.*  
902 (2018). Phospholipid scramblase 1 interacts with influenza A virus NP, impairing its nuclear  
903 import and thereby suppressing virus replication. *PLoS Pathog* *14*, e1006851.
- 904 Luo, X.C., Chen, Z.H., Xue, J.B., Zhao, D.X., Lu, C., Li, Y.H., Li, S.M., Du, Y.W., Liu, Q.,  
905 Wang, P., *et al.* (2019). Infection by the parasitic helminth *Trichinella spiralis* activates a Tas2r-  
906 mediated signaling pathway in intestinal tuft cells. *Proc Natl Acad Sci U S A* *116*, 5564-5569.
- 907 Maina, I.W., Workman, A.D., and Cohen, N.A. (2018). The role of bitter and sweet taste  
908 receptors in upper airway innate immunity: Recent advances and future directions. *World J*  
909 *Otorhinolaryngol Head Neck Surg* *4*, 200-208.

- 910 McGinty, J.W., Ting, H.-A., Billipp, T.E., Nadjombati, M.S., Khan, D.M., Barrett, N.A., Liang,  
911 H.-E., Matsumoto, I., and von Moltke, J. (2020). Tuft-Cell-Derived Leukotrienes Drive Rapid  
912 Anti-helminth Immunity in the Small Intestine but Are Dispensable for Anti-protist Immunity.  
913 *Immunity* 52, 528-541.e527.
- 914 McLaughlin, S.K., McKinnon, P.J., and Margolskee, R.F. (1992). Gustducin is a taste-cell-  
915 specific G protein closely related to the transducins. *Nature* 357, 563-569.
- 916 Meyerson, N.R., Zhou, L., Guo, Y.R., Zhao, C., Tao, Y.J., Krug, R.M., and Sawyer, S.L. (2017).  
917 Nuclear TRIM25 Specifically Targets Influenza Virus Ribonucleoproteins to Block the Onset of  
918 RNA Chain Elongation. *Cell Host Microbe* 22, 627-638 e627.
- 919 Mogha, A., Harty, B.L., Carlin, D., Joseph, J., Sanchez, N.E., Suter, U., Piao, X., Cavalli, V., and  
920 Monk, K.R. (2016). Gpr126/Adgrg6 Has Schwann Cell Autonomous and Nonautonomous  
921 Functions in Peripheral Nerve Injury and Repair. *The Journal of Neuroscience* 36, 12351.
- 922 Mombaerts, P., Wang, F., Dulac, C., Chao, S.K., Nemes, A., Mendelsohn, M., Edmondson, J.,  
923 and Axel, R. (1996). Visualizing an olfactory sensory map. *Cell* 87, 675-686.
- 924 Narayana, S.K., Helbig, K.J., McCartney, E.M., Eyre, N.S., Bull, R.A., Eltahla, A., Lloyd, A.R.,  
925 and Beard, M.R. (2015). The Interferon-induced Transmembrane Proteins, IFITM1, IFITM2,  
926 and IFITM3 Inhibit Hepatitis C Virus Entry. *J Biol Chem* 290, 25946-25959.



- 927 Noyce, R.S., and Richardson, C.D. (2012). Nectin 4 is the epithelial cell receptor for measles  
928 virus. *Trends Microbiol* *20*, 429-439.
- 929 O'Leary, C.E., Schneider, C., and Locksley, R.M. (2019). Tuft Cells-Systemically Dispersed  
930 Sensory Epithelia Integrating Immune and Neural Circuitry. *Annu Rev Immunol* *37*, 47-72.
- 931 Ogura, T., Szebenyi, S.A., Krosnowski, K., Sathyanesan, A., Jackson, J., and Lin, W. (2011).  
932 Cholinergic microvillous cells in the mouse main olfactory epithelium and effect of acetylcholine  
933 on olfactory sensory neurons and supporting cells. *J Neurophysiol* *106*, 1274-1287.
- 934 Omura, M., and Mombaerts, P. (2014). Trpc2-Expressing Sensory Neurons in the Main  
935 Olfactory Epithelium of the Mouse. *Cell Reports* *8*, 583-595.
- 936 Oshimoto, A., Wakabayashi, Y., Garske, A., Lopez, R., Rolen, S., Flowers, M., Arevalo, N., and  
937 Restrepo, D. (2013). Potential role of transient receptor potential channel M5 in sensing putative  
938 pheromones in mouse olfactory sensory neurons. *PLoS One* *8*, e61990.
- 939 Parma, V., Ohla, K., Veldhuizen, M.G., Niv, M.Y., Kelly, C.E., Bakke, A.J., Cooper, K.W.,  
940 Bouysset, C., Pirastu, N., Dibattista, M., *et al.* (2020). More than smell – COVID-19 is  
941 associated with severe impairment of smell, taste, and chemesthesis. *Chemical Senses* *45*, 609-  
942 622.
- 943 Patro, R., Duggal, G., Love, M.I., Irizarry, R.A., and Kingsford, C. (2017). Salmon provides fast  
944 and bias-aware quantification of transcript expression. *Nature methods* *14*, 417-419.

- 945 Perniss, A., Liu, S., Boonen, B., Keshavarz, M., Ruppert, A.L., Timm, T., Pfeil, U., Soultanova,  
946 A., Kusumakshi, S., Delventhal, L., *et al.* (2020). Chemosensory Cell-Derived Acetylcholine  
947 Drives Tracheal Mucociliary Clearance in Response to Virulence-Associated Formyl Peptides.  
948 *Immunity* 52, 683-699 e611.
- 949 Petermann, P., Rahn, E., Thier, K., Hsu, M.J., Rixon, F.J., Kopp, S.J., and Knebel-Morsdorf, D.  
950 (2015). Role of Nectin-1 and Herpesvirus Entry Mediator as Cellular Receptors for Herpes  
951 Simplex Virus 1 on Primary Murine Dermal Fibroblasts. *J Virol* 89, 9407-9416.
- 952 Pomaznoy, M., Ha, B., and Peters, B. (2018). GONet: a tool for interactive Gene Ontology  
953 analysis. *BMC Bioinformatics* 19, 470.
- 954 Pyrski, M., Eckstein, E., Schmid, A., Bufe, B., Weiss, J., Chubanov, V., Boehm, U., and Zufall,  
955 F. (2017). Trpm5 expression in the olfactory epithelium. *Mol Cell Neurosci* 80, 75-88.
- 956 Pyrski, M., Tusty, M., Eckstein, E., Oboti, L., Rodriguez-Gil, D.J., Greer, C.A., and Zufall, F.  
957 (2018). P/Q Type Calcium Channel Cav2.1 Defines a Unique Subset of Glomeruli in the Mouse  
958 Olfactory Bulb. *Frontiers in Cellular Neuroscience* 12, 295.
- 959 Rane, C.K., Jackson, S.R., Pastore, C.F., Zhao, G., Weiner, A.I., Patel, N.N., Herbert, D.R.,  
960 Cohen, N.A., and Vaughan, A.E. (2019). Development of solitary chemosensory cells in the  
961 distal lung after severe influenza injury. *Am J Physiol Lung Cell Mol Physiol* 316, L1141-  
962 L1149.

963 Sapoznik, E., Chang, B.-J., Huh, J., Ju, R.J., Azarova, E.V., Pohlkamp, T., Welf, E.S.,  
964 Broadbent, D., Carisey, A.F., Stehbens, S.J., *et al.* (2020). A Versatile Oblique Plane Microscope  
965 for Large-Scale and High-Resolution Imaging of Subcellular Dynamics. *eLife* 9, e57681.

966 Saunders, C.J., Christensen, M., Finger, T.E., and Tizzano, M. (2014). Cholinergic  
967 neurotransmission links solitary chemosensory cells to nasal inflammation. *Proc Natl Acad Sci U*  
968 *S A* 111, 6075-6080.

969 Sayers, C.L., and Elliott, G. (2016). Herpes Simplex Virus 1 Enters Human Keratinocytes by a  
970 Nectin-1-Dependent, Rapid Plasma Membrane Fusion Pathway That Functions at Low  
971 Temperature. *J Virol* 90, 10379-10389.

972 Sepahi, A., Kraus, A., Casadei, E., Johnston, C.A., Galindo-Villegas, J., Kelly, C., García-  
973 Moreno, D., Muñoz, P., Mulero, V., Huertas, M., *et al.* (2019). Olfactory sensory neurons  
974 mediate ultrarapid antiviral immune responses in a TrkA-dependent manner. *Proceedings of the*  
975 *National Academy of Sciences* 116, 12428.

976 Shestakov, A., Jenssen, H., Nordstrom, I., and Eriksson, K. (2012). Lactoferricin but not  
977 lactoferrin inhibit herpes simplex virus type 2 infection in mice. *Antiviral Res* 93, 340-345.

978 Shukla, N.D., Tiwari, V., and Valyi-Nagy, T. (2012). Nectin-1-specific entry of herpes simplex  
979 virus 1 is sufficient for infection of the cornea and viral spread to the trigeminal ganglia. *Mol Vis*  
980 18, 2711-2716.

- 981 Singh, B.K., Hornick, A.L., Krishnamurthy, S., Locke, A.C., Mendoza, C.A., Mateo, M., Miller-  
982 Hunt, C.L., Cattaneo, R., and Sinn, P.L. (2015). The Nectin-4/Afadin Protein Complex and  
983 Intercellular Membrane Pores Contribute to Rapid Spread of Measles Virus in Primary Human  
984 Airway Epithelia. *J Virol* 89, 7089-7096.
- 985 Singh, B.K., Li, N., Mark, A.C., Mateo, M., Cattaneo, R., and Sinn, P.L. (2016). Cell-to-Cell  
986 Contact and Nectin-4 Govern Spread of Measles Virus from Primary Human Myeloid Cells to  
987 Primary Human Airway Epithelial Cells. *J Virol* 90, 6808-6817.
- 988 Sonesson, C., Love, M.I., and Robinson, M.D. (2015). Differential analyses for RNA-seq:  
989 transcript-level estimates improve gene-level inferences. *F1000Res* 4, 1521.
- 990 Thompson, J.A., Salcedo, E., Restrepo, D., and Finger, T.E. (2012). Second-order input to the  
991 medial amygdala from olfactory sensory neurons expressing the transduction channel TRPM5. *J*  
992 *Comp Neurol* 520, 1819-1830.
- 993 Ting, H.-A., and von Moltke, J. (2019). The Immune Function of Tuft Cells at Gut Mucosal  
994 Surfaces and Beyond. *The Journal of Immunology* 202, 1321.
- 995 Tizzano, M., Gulbransen, B.D., Vandenbeuch, A., Clapp, T.R., Herman, J.P., Sibhatu, H.M.,  
996 Churchill, M.E., Silver, W.L., Kinnamon, S.C., and Finger, T.E. (2010). Nasal chemosensory  
997 cells use bitter taste signaling to detect irritants and bacterial signals. *Proc Natl Acad Sci U S A*  
998 *107*, 3210-3215.

- 999 Ualiyeva, S., Hallen, N., Kanaoka, Y., Ledderose, C., Matsumoto, I., Junger, W., Barrett, N.A.,  
1000 and Bankova, L.G. (2020). Airway brush cells generate cysteinyl leukotrienes through the ATP  
1001 sensor P2Y2. *Science immunology* 5.
- 1002 Valimaa, H., Tenovuo, J., Waris, M., and Hukkanen, V. (2009). Human lactoferrin but not  
1003 lysozyme neutralizes HSV-1 and inhibits HSV-1 replication and cell-to-cell spread. *Virology* 6, 53.
- 1004 van der Linden, C., Jakob, S., Gupta, P., Dulac, C., and Santoro, S.W. (2018). Sex separation  
1005 induces differences in the olfactory sensory receptor repertoires of male and female mice. *Nature*  
1006 *Commun* 9, 5081.
- 1007 Villar, P.S., Delgado, R., Vergara, C., Reyes, J.G., and Bacigalupo, J. (2017). Energy  
1008 Requirements of Odor Transduction in the Chemosensory Cilia of Olfactory Sensory Neurons  
1009 Rely on Oxidative Phosphorylation and Glycolytic Processing of Extracellular Glucose. *J*  
1010 *Neurosci* 37, 5736-5743.
- 1011 von Moltke, J., Ji, M., Liang, H.E., and Locksley, R.M. (2016). Tuft-cell-derived IL-25 regulates  
1012 an intestinal ILC2-epithelial response circuit. *Nature* 529, 221-225.
- 1013 Wilen, C.B., Lee, S., Hsieh, L.L., Orchard, R.C., Desai, C., Hykes, B.L., McAllaster, M.R.,  
1014 Balce, D.R., Feehley, T., Brestoff, J.R., *et al.* (2018). Tropism for tuft cells determines immune  
1015 promotion of norovirus pathogenesis. *Science* 360, 204.

- 1016 Yamaguchi, T., Yamashita, J., Ohmoto, M., Aoude, I., Ogura, T., Luo, W., Bachmanov, A.A.,  
1017 Lin, W., Matsumoto, I., and Hirota, J. (2014). Skn-1a/Pou2f3 is required for the generation of  
1018 Trpm5-expressing microvillous cells in the mouse main olfactory epithelium. *BMC Neurosci* 15,  
1019 13.
- 1020 Yamashita, J., Ohmoto, M., Yamaguchi, T., Matsumoto, I., and Hirota, J. (2017). Skn-1a/Pou2f3  
1021 functions as a master regulator to generate Trpm5-expressing chemosensory cells in mice. *PLoS*  
1022 *One* 12, e0189340.
- 1023 Yan, C.H., Faraji, F., Prajapati, D.P., Boone, C.E., and DeConde, A.S. (2020a). Association of  
1024 chemosensory dysfunction and Covid-19 in patients presenting with influenza-like symptoms.  
1025 *Int Forum Allergy Rhinol*.
- 1026 Yan, C.H., Faraji, F., Prajapati, D.P., Ostrander, B.T., and DeConde, A.S. (2020b). Self-reported  
1027 olfactory loss associates with outpatient clinical course in Covid-19. *Int Forum Allergy Rhinol*.
- 1028 Yang, J., Zhu, X., Liu, J., Ding, X., Han, M., Hu, W., Wang, X., Zhou, Z., and Wang, S. (2012).  
1029 Inhibition of Hepatitis B virus replication by phospholipid scramblase 1 in vitro and in vivo.  
1030 *Antiviral Res* 94, 9-17.
- 1031 Yu, J., Li, M., Wilkins, J., Ding, S., Swartz, T.H., Esposito, A.M., Zheng, Y.M., Freed, E.O.,  
1032 Liang, C., Chen, B.K., *et al.* (2015). IFITM Proteins Restrict HIV-1 Infection by Antagonizing  
1033 the Envelope Glycoprotein. *Cell Rep* 13, 145-156.

- 1034 Zerbino, D.R., Achuthan, P., Akanni, W., Amode, M.R., Barrell, D., Bhai, J., Billis, K.,  
1035 Cummins, C., Gall, A., Giron, C.G., *et al.* (2018). Ensembl 2018. *Nucleic Acids Res* *46*, D754-  
1036 D761.
- 1037 Zhang, Y., Hoon, M.A., Chandrashekar, J., Mueller, K.L., Cook, B., Wu, D., Zuker, C.S., and  
1038 Ryba, N.J. (2003). Coding of sweet, bitter, and umami tastes: different receptor cells sharing  
1039 similar signaling pathways. *Cell* *112*, 293-301.
- 1040 Zheng, Y., Qin, Z., Ye, Q., Chen, P., Wang, Z., Yan, Q., Luo, Z., Liu, X., Zhou, Y., Xiong, W.,  
1041 *et al.* (2014). Lactoferrin suppresses the Epstein-Barr virus-induced inflammatory response by  
1042 interfering with pattern recognition of TLR2 and TLR9. *Lab Invest* *94*, 1188-1199.
- 1043 Zheng, Y., Zhang, W., Ye, Q., Zhou, Y., Xiong, W., He, W., Deng, M., Zhou, M., Guo, X.,  
1044 Chen, P., *et al.* (2012). Inhibition of Epstein-Barr virus infection by lactoferrin. *J Innate Immun*  
1045 *4*, 387-398.
- 1046 Ziegler, C.G.K., Allon, S.J., Nyquist, S.K., Mbanjo, I.M., Miao, V.N., Tzouanas, C.N., Cao, Y.,  
1047 Yousif, A.S., Bals, J., Hauser, B.M., *et al.* (2020). SARS-CoV-2 receptor ACE2 is an interferon-  
1048 stimulated gene in human airway epithelial cells and is detected in specific cell subsets across  
1049 tissues. *Cell* *181*, 1016-1035.
- 1050  
1051

1052 **Figure 1. Fluorescence activated sorting (FACS) of cells isolated from the olfactory**  
1053 **epithelium.**

1054 **a.** TRPM5 promoter driven expression of eGFP and OMP promoter driven expression of  
1055 mCherry in the olfactory epithelium. Expression of eGFP is found both in MVCs that do not  
1056 express mCherry (asterisk) and in OSNs double labeled with eGFP and mCherry (arrow). **i.**  
1057 Composite, **ii.** eGFP, **iii.** mCherry, **iv.** Composite magnification. Magenta: mCherry, green:  
1058 eGFP. Scale bar: i-iii, 50  $\mu$ m, iv, 10  $\mu$ m.

1059 **b.** Schematic of RNA-seq process from tissue to RNA extraction. Mouse OE was dissociated  
1060 into single cells and sorted via FACS. RNA was extracted from each of the resulting cell  
1061 populations.

1062 **c.** Two isolated OSNs differing in eGFP expression. Magenta: mCherry, green: eGFP. Scale bar:  
1063 10  $\mu$ m.

1064 **d.** Distribution of mCherry and eGFP fluorescence intensity for FACS-sorted cells. Three cell  
1065 populations were isolated for RNAseq: Cells with low OMP promoter-driven mCherry  
1066 expression and high TRPM5 promoter-driven eGFP expression (MVC\_eGFP cells), cells with  
1067 high OMP promoter-driven mCherry and low eGFP expression (OSN\_eGFP- cells) and cells  
1068 with eGFP expression of the same magnitude as MVC\_eGFP cells and high OMP promoter-  
1069 driven mCherry expression (OSN\_eGFP+ cells). The number of cells collected for this FACS  
1070 run were: OSN\_eGFP-s 1,500,000, OSN\_eGFP+s 5336 and MVC\_eGFP cells 37,178.

1071 **e.** qPCR levels (normalized to levels 18s RNA) for expression of transcripts encoding for OMP  
1072 **(i)**, TRPM5 **(ii)**, eGFP **(iii)** and ChAT **(iv)**. The asterisks denote significant differences tested  
1073 with either t-test or ranksum with p-values below the significance p-value corrected for multiple  
1074 comparisons using the false discovery rate (pFDR)(Curran-Everett, 2000). pFDR is 0.033 for



1075 OMP, 0.05 for TRPM5, 0.05 for eGFP and 0.03 for ChAT, n=8 for OMP OSN\_eGFP-s, 4 for  
1076 OMP OSN\_eGFP+s and 4 for MVC\_eGFP cells.

1077

1078 **Figure 2. RNAseq comparison of MVC\_eGFP vs. OSN\_eGFP- cells.**

1079 **a.** Heatmaps showing hierarchical clustering of the top 10 upregulated and top 10 downregulated  
1080 genes identified by DESeq2.

1081 **b.** Heatmaps showing hierarchical clustering of the 550 olfactory receptor genes identified by  
1082 DESeq2 as expressed in OSN\_eGFP- cells. For both a and b, row and column order were  
1083 determined automatically by the *pHeatmap* package in R. Row values were centered and scaled  
1084 using ‘scale = “row”’ within *pHeatmap*.

1085 **c.** Volcano plot of all olfactory receptors, demonstrating the large number of enriched olfactory  
1086 receptors in the OSN\_eGFP- population.

1087 **d.** Hierarchical clustering of transcripts for taste transduction and transcripts expressed in  
1088 canonical and non-canonical OSNs identified by RNAseq as significantly different in expression  
1089 between MVC\_eGFP and OSN\_eGFP- cells. The non-canonical OSNs considered here included  
1090 guanylyl-cyclase D (GC-D) OSNs (Juilfs et al., 1997), Trpc2 OSNs (Omura and Mombaerts,  
1091 2014), Cav2.1 OSNs (Pyrski et al., 2018), and OSNs expressing trace amine-associated receptors  
1092 (Taars) (Liberles, 2015). Transcripts identified by DESeq2.

1093 **e.** Gene ontology (GO) term enrichment for synaptic vesicle or chemosensory-related GOs was  
1094 calculated from differentially expressed genes using *TopGO* in R. An enrichment value for genes  
1095 with Fischer p value <0.05 was calculated by dividing the number of expressed genes within the  
1096 GO term by the number expected genes (by random sampling, determined by *TopGO*).

1097

1098 **Figure 3. Significant differences in virally-related, immune and inflammation gene**  
1099 **ontology lists between MVC\_eGFP and OSN\_eGFP-. a.** Gene ontology (GO) term enrichment  
1100 was calculated from differentially expressed genes using *TopGO* in R for OSN\_eGFP- vs.  
1101 MVC\_eGFP cells. An enrichment value for genes with Fischer p value <0.05 was calculated by  
1102 dividing the number of expressed genes within the GO term by the number expected genes (by  
1103 random sampling, determined by *TopGO*). Heatmap show hierarchical clustering of significantly  
1104 differentially expressed genes identified by DESeq2. **b.** Significantly differences in virally-  
1105 related genes within the MVC\_eGFP cells compared to OSN\_eGFP-.

1106

1107 **Figure 4. RNAseq comparison of OSN\_eGFP+ to both MVC\_eGFP and OSN\_eGFP- cells.**

1108 **a.** Heatmap showing the top upregulated genes (excluding *Olfrs*) that are expressed in  
1109 OSN\_eGFP+ cells 4 fold higher than OSN\_eGFP- AND MVC\_eGFP cells. Additional criteria  
1110 for inclusion was mean of expression > standard deviation of expression and mean of expression  
1111 greater than 100.

1112 **b.** Heatmap showing all *Olfr* genes differentially expressed between OSN\_eGFP+ and  
1113 OSN\_eGFP- cells identified by DESeq2. MVC\_eGFP cells did not express *Olfrs*.

1114 For both a and b, row and column order were determined automatically by the *pHeatmap*  
1115 package in R. For each data point relative expression was calculated by subtracting the average  
1116 row value from each individual value.

1117 **c.** Volcano plot of all Olfactory receptors, demonstrating the small number of enriched olfactory  
1118 receptors in the OSN\_eGFP+ population.

1119 **d.** Hierarchical clustering of transcripts for taste transduction and transcripts expressed in  
1120 canonical and non-canonical OSNs identified by RNAseq as significantly different in expression

1121 between the cell groups. We compared expression of transcripts involved in taste transduction,  
1122 canonical olfactory transduction, and non-canonical OSNs. The non-canonical OSNs considered  
1123 here included guanylyl-cyclase D (GC-D) OSNs (Juilfs et al., 1997), Trpc2 OSNs (Omura and  
1124 Mombaerts, 2014), Cav2.1 OSNs (Pyrski et al., 2018), and OSNs expressing trace amine-  
1125 associated receptors (Taars) (Liberles, 2015). Transcripts identified by DESeq2.

1126

1127 **Figure 5. *In situ* hybridization chain reaction finds strong TRPM5 mRNA expression in**  
1128 **MVC\_eGFP cells, but not in the nuclear OSN layer.**

1129 **a.** *In situ* for TRPM5 (yellow) and OMP (magenta) transcripts in the olfactory epithelium of  
1130 TRPM5-GFP mice (GFP is green) shows strong label for TRPM5 in MVCs (asterisks) and  
1131 sparse labeling in the OSN nuclear layer (arrows). The scale bar is 20  $\mu$ m.

1132 **b.** *In situ* for TRPM5 (yellow) and OMP (magenta) transcripts in the olfactory epithelium of  
1133 TRPM5-GFP x TRPM5-knockout mice (GFP is green) shows no label for TRPM5 in GFP-  
1134 positive MVCs (asterisks) and does show sparse labeling in the OSN nuclear layer (arrows). The  
1135 scale bar is 20  $\mu$ m.

1136

1137 **Figure 6. Model depicting the role for microvillous cells involvement in the olfactory**

1138 **epithelium innate immune response to viral infection.** 1) Secreted or cell surface  
1139 glycoproteins constitute a first barrier preventing virus entry. 2) When reaching MVC\_eGFP,  
1140 viruses can encounter three types of membrane proteins: adhesion molecules that trigger  
1141 intracellular signaling upon viral recognition (black rectangle), transmembrane proteins that  
1142 block virus entry (black circle), viral receptors allowing virus entry (grey circle). 3) MVC\_eGFP  
1143 express numerous transcriptional factors involved in the inhibition of viral replication. 4)

1144 Cytosolic viral RNA sensing induces the production of type I interferons. 5) A possible signaling  
1145 pathway leading to intracellular calcium increase, TRPM5 activation and Na<sup>+</sup>-mediated vesicle  
1146 release. Acetylcholine can activate neighboring sustentacular cells and underlying trigeminal  
1147 fibers. 6) Eicosanoids synthesis, along with IL-25 production, can recruit and activate group 2  
1148 innate lymphoid cells, which are key controllers of type 2 inflammation. 7) GPR126 activation  
1149 results in NFκB activation and TNFα production. TNFα can directly activate macrophages.  
1150 TNFα also induces a change in the function of horizontal basal cells, switching their phenotype  
1151 from neuroregeneration to immune defense. 8) Interferons and cytokines can in turn activate  
1152 antiviral immune response in neighboring MVC\_eGFP.  
1153  
1154

| Name                | OSN_eGFP- | OSN_eGFP+ | MVC_eGFP | p-value adjusted |
|---------------------|-----------|-----------|----------|------------------|
| <i>Olfr292</i>      | 3.61      | 959       | 4.29     | 6.35E-09         |
| <i>Olfr282</i>      | 2.05      | 486       | 0        | 8.01E-05         |
| <i>Olfr1434</i>     | 53.3      | 7730      | 0        | 9.71E-16         |
| <i>Olfr390</i>      | 101       | 10800     | 43.1     | 1.56E-16         |
| <i>Olfr305</i>      | 6.14      | 612       | 0        | 6.3E-12          |
| <i>Olfr293</i>      | 6.96      | 664       | 16.9     | 1.42E-07         |
| <i>Olfr378</i>      | 3.41      | 322       | 0        | 1.1E-06          |
| <i>Olfr128</i>      | 39.6      | 3660      | 12.7     | 7.33E-14         |
| <i>Olfr344</i>      | 16.2      | 1050      | 0        | 1.4E-11          |
| <i>Olfr307</i>      | 7.59      | 393       | 0        | 3.76E-06         |
| <i>Olfr391</i>      | 156       | 8000      | 9.79     | 1.01E-15         |
| <i>Olfr299</i>      | 13.1      | 651       | 0        | 4.58E-09         |
| <i>Olfr142</i>      | 36.4      | 1720      | 3.77     | 1.62E-08         |
| <i>Olfr1</i>        | 147       | 5720      | 52.7     | 3.08E-10         |
| <i>Olfr1279</i>     | 16.4      | 552       | 10.9     | 3.52E-07         |
| <i>Olfr39</i>       | 13.8      | 388       | 21       | 2.81E-06         |
| <i>Olfr1447</i>     | 64.1      | 1610      | 0        | 1.23E-07         |
| <i>Olfr728</i>      | 2150      | 45700     | 320      | 6.13E-22         |
| <i>Olfr727</i>      | 560       | 11000     | 179      | 1.64E-07         |
| <i>Olfr1555-ps1</i> | 10.1      | 175       | 0        | 0.0397           |
| <i>Olfr346</i>      | 27.6      | 465       | 0        | 3.85E-05         |
| <i>Olfr1228</i>     | 533       | 5320      | 35.4     | 3.09E-08         |
| <i>Olfr1181</i>     | 87.4      | 766       | 4.61     | 0.000766         |
| <i>Olfr943</i>      | 97.1      | 844       | 2.89     | 0.000886         |
| <i>Olfr298</i>      | 60.1      | 509       | 0        | 0.00132          |

1155

1156 **Table 1. Levels of expression and adjusted p-value for the olfactory receptor genes whose**

1157 **levels are significantly higher in OSN\_eGFP+ compared to OSN\_eGFP-. These olfactory**

1158 receptors had an adjusted p-value for expression level difference between OSN\_eGFP+

1159 compared to OSN\_eGFP- and had a fold change > 4 and average expression > 100 counts.

1160

1161

1162

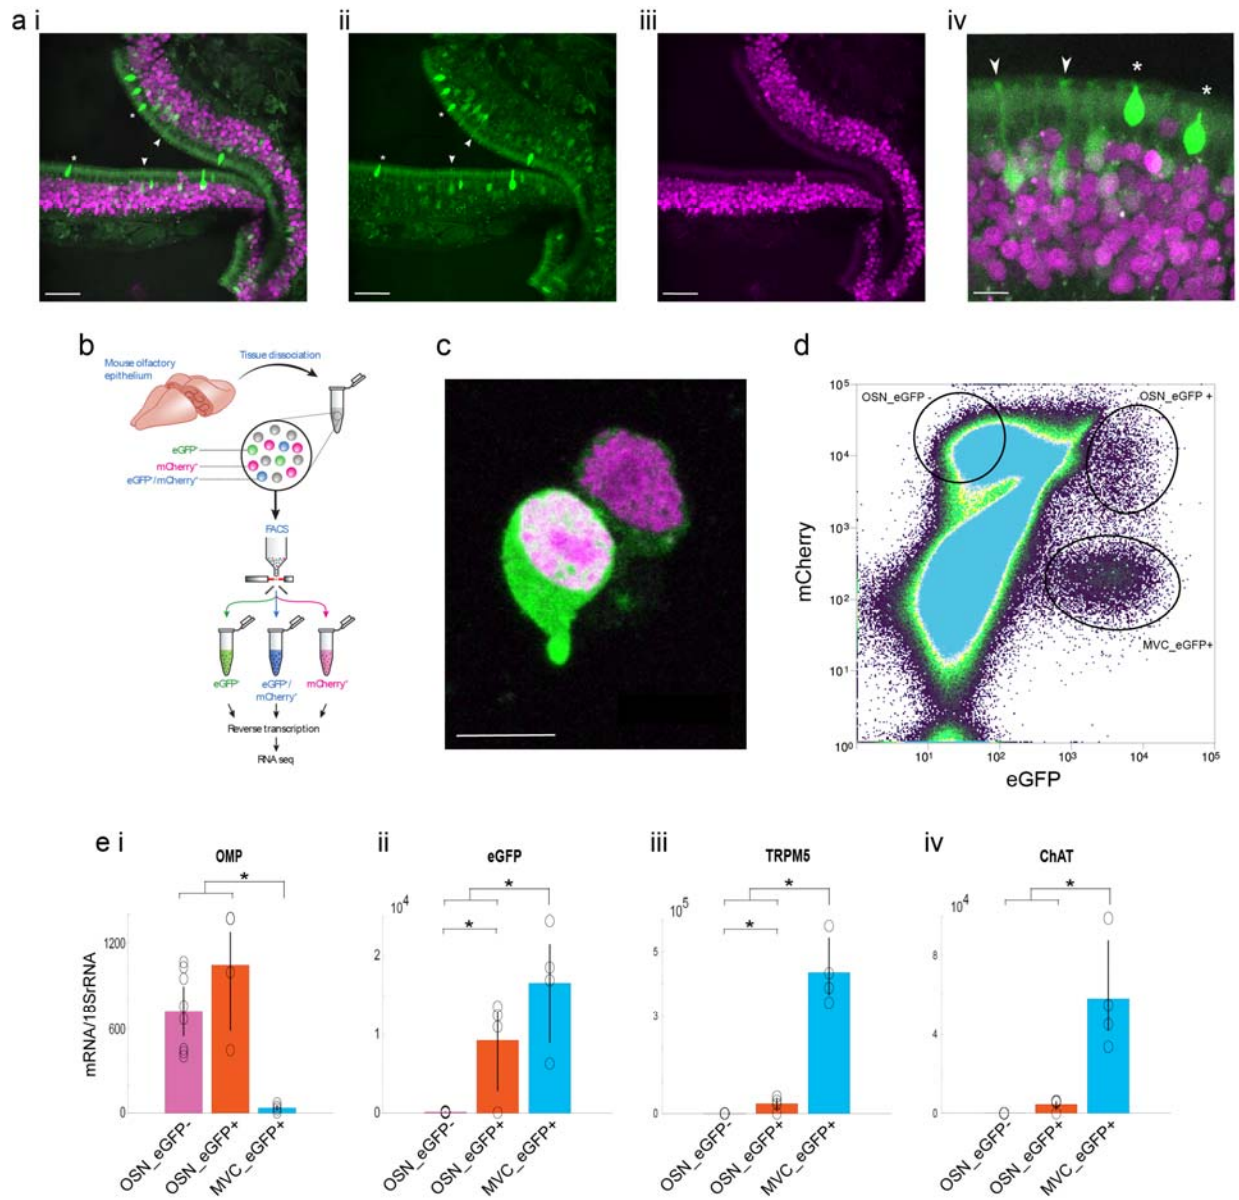

1163

1164 **Figure 1. Fluorescence activated sorting (FACS) of cells isolated from the olfactory**  
 1165 **epithelium.**

1166 **a.** TRPM5 promoter driven expression of eGFP and OMP promoter driven expression of  
 1167 mCherry in the olfactory epithelium. Expression of eGFP is found both in MVCs that do not  
 1168 express mCherry (asterisk) and in OSNs double labeled with eGFP and mCherry (arrow). **i.**  
 1169 Composite, **ii.** eGFP, **iii.** mCherry, **iv.** Composite magnification. Magenta: mCherry, green:  
 1170 eGFP. Scale bar: i-iii, 50  $\mu$ m, iv, 10  $\mu$ m.

1171 **b.** Schematic of RNA-seq process from tissue to RNA extraction. Mouse OE was dissociated  
1172 into single cells and sorted via FACS. RNA was extracted from each of the resulting cell  
1173 populations.

1174 **c.** Two isolated OSNs differing in eGFP expression. Magenta: mCherry, green: eGFP. Scale bar:  
1175 10  $\mu$ m.

1176 **d.** Distribution of mCherry and eGFP fluorescence intensity for FACS-sorted cells. Three cell  
1177 populations were isolated for RNAseq: Cells with low OMP promoter-driven mCherry  
1178 expression and high TRPM5 promoter-driven eGFP expression (MVC\_eGFP cells), cells with  
1179 high OMP promoter-driven mCherry and low eGFP expression (OSN\_eGFP- cells) and cells  
1180 with eGFP expression of the same magnitude as MVC\_eGFP cells and high OMP promoter-  
1181 driven mCherry expression (OSN\_eGFP+ cells). The number of cells collected for this FACS  
1182 run were: OSN\_eGFP-s 1,500,000, OSN\_eGFP+s 5336 and MVC\_eGFP cells 37,178.

1183 **e.** qPCR levels (normalized to levels 18s RNA) for expression of transcripts encoding for OMP  
1184 **(i)**, TRPM5 **(ii)**, eGFP **(iii)** and ChAT **(iv)**. The asterisks denote significant differences tested  
1185 with either t-test or ranksum with p-values below the significance p-value corrected for multiple  
1186 comparisons using the false discovery rate (pFDR)(Curran-Everett, 2000). pFDR is 0.033 for  
1187 OMP, 0.05 for TRPM5, 0.05 for eGFP and 0.03 for ChAT, n=8 for OMP OSN\_eGFP-s, 4 for  
1188 OMP OSN\_eGFP+s and 4 for MVC\_eGFP cells.

1189



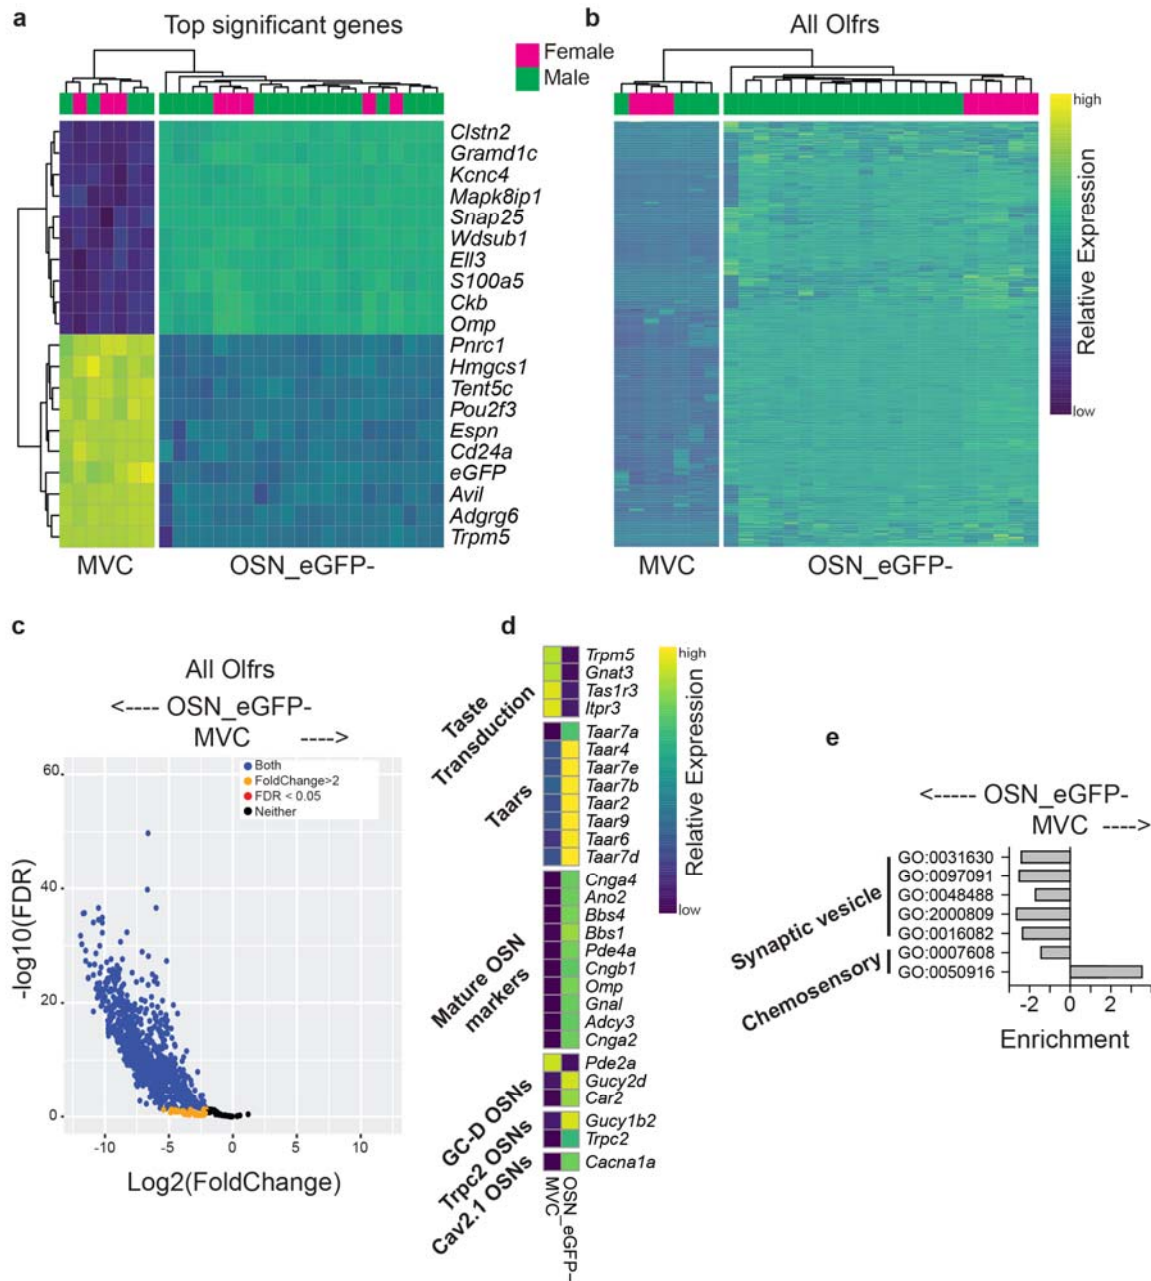

1190

1191 **Figure 2. RNAseq comparison of MVC\_eGFP vs. OSN\_eGFP- cells.**

1192 **a.** Heatmaps showing hierarchical clustering of the top 10 upregulated and top 10 downregulated  
1193 genes identified by DESeq2.

1194 **b.** Heatmaps showing hierarchical clustering of the 550 olfactory receptor genes identified by

1195 DESeq2 as expressed in OSN\_eGFP- cells. For both a and b, row and column order were



1196 determined automatically by the *pHeatmap* package in R. Row values were centered and scaled  
1197 using ‘scale = “row”’ within *pHeatmap*.

1198 **c.** Volcano plot of all olfactory receptors, demonstrating the large number of enriched olfactory  
1199 receptors in the OSN\_eGFP- population.

1200 **d.** Hierarchical clustering of transcripts for taste transduction and transcripts expressed in  
1201 canonical and non-canonical OSNs identified by RNAseq as significantly different in expression  
1202 between MVC\_eGFP and OSN\_eGFP- cells. The non-canonical OSNs considered here included  
1203 guanylyl-cyclase D (GC-D) OSNs (Juilfs et al., 1997), Trpc2 OSNs (Omura and Mombaerts,  
1204 2014), Cav2.1 OSNs (Pyrski et al., 2018), and OSNs expressing trace amine-associated receptors  
1205 (Taars) (Liberles, 2015). Transcripts identified by DESeq2.

1206 **e.** Gene ontology (GO) term enrichment for synaptic vesicle or chemosensory-related GOs was  
1207 calculated from differentially expressed genes using *TopGO* in R. An enrichment value for genes  
1208 with Fischer p value <0.05 was calculated by dividing the number of expressed genes within the  
1209 GO term by the number expected genes (by random sampling, determined by *TopGO*).

1210

1211

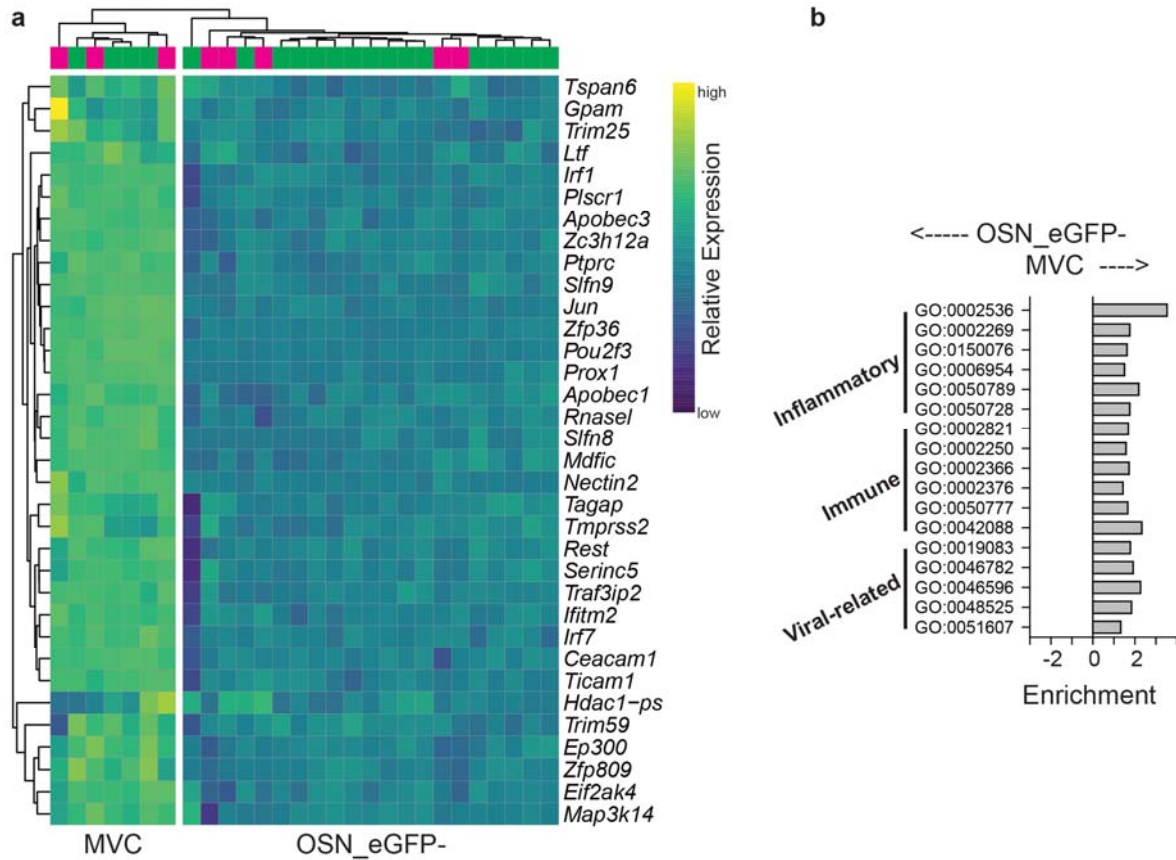

1212

1213 **Figure 3. Significant differences in virally-related, immune and inflammation gene**

1214 **ontology lists between MVC\_eGFP and OSN\_eGFP-. a.** Gene ontology (GO) term enrichment

1215 was calculated from differentially expressed genes using *TopGO* in R for OSN\_eGFP- vs.

1216 MVC\_eGFP cells. An enrichment value for genes with Fischer p value <0.05 was calculated by

1217 dividing the number of expressed genes within the GO term by the number expected genes (by

1218 random sampling, determined by *TopGO*). Heatmap show hierarchical clustering of significantly

1219 differentially expressed genes identified by DESeq2. **b.** Significantly differences in virally-

1220 related genes within the MVC\_eGFP cells compared to OSN\_eGFP-.

1221

1222

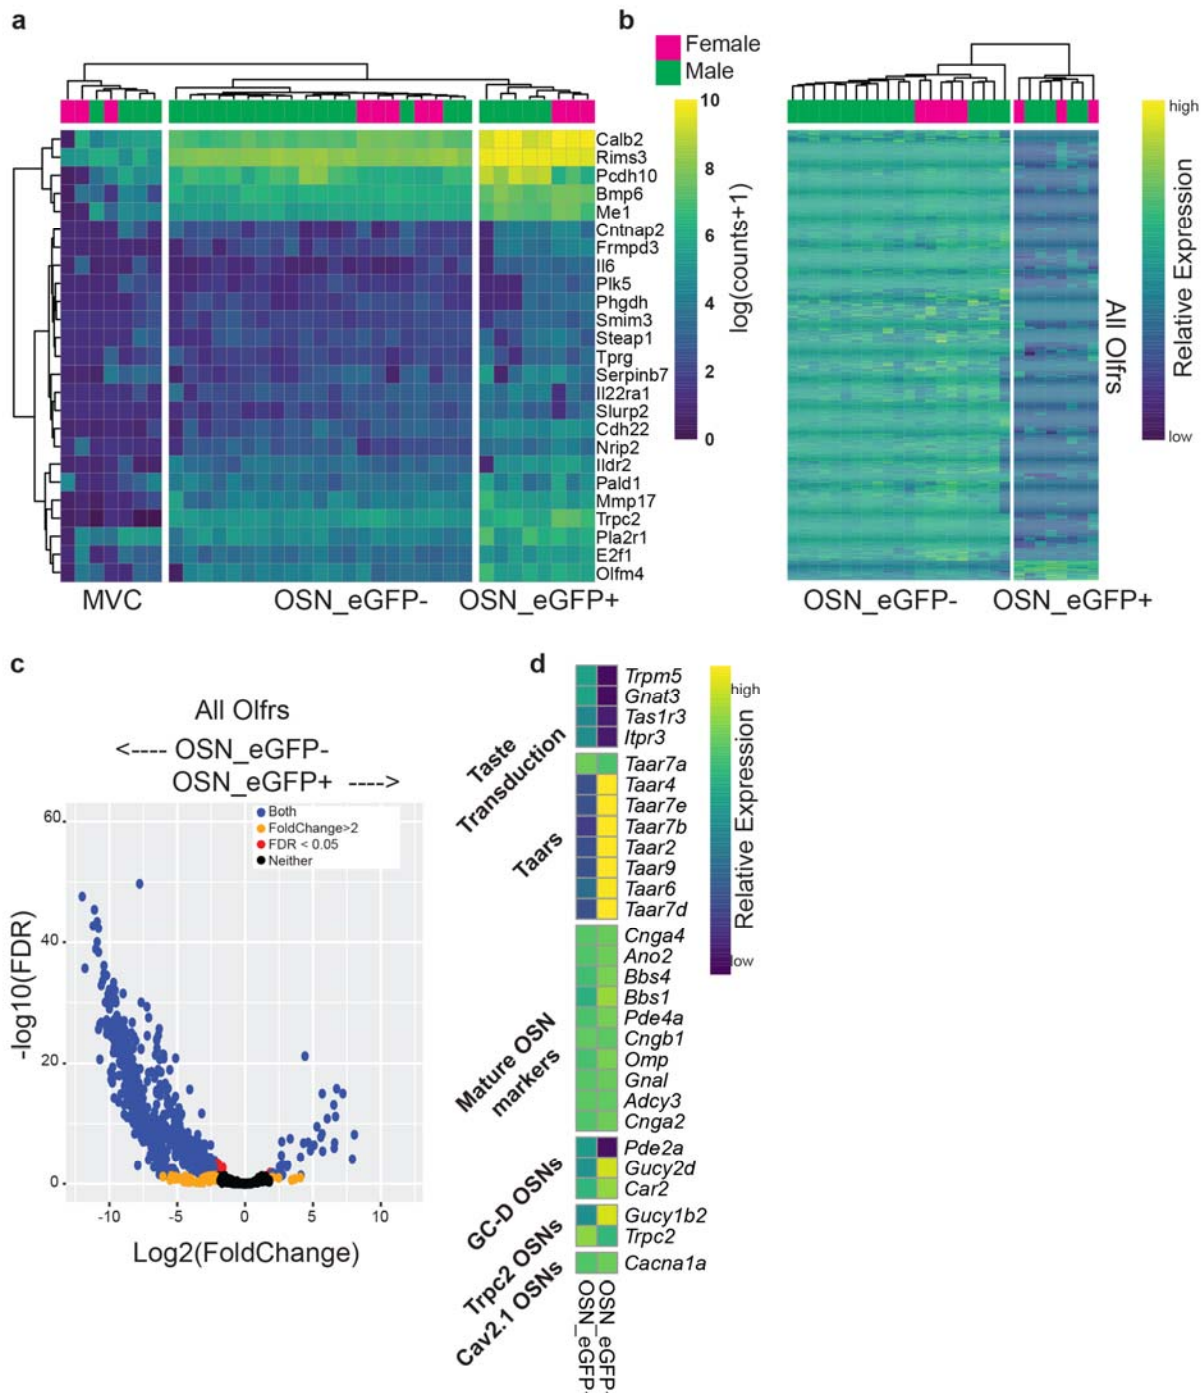

1223

1224 **Figure 4. RNAseq comparison of OSN\_eGFP+ to both MVC\_eGFP and OSN\_eGFP- cells.**

1225 **a.** Heatmap showing the top upregulated genes (excluding Olfrs) that are expressed in

1226 OSN\_eGFP+ cells 4 fold higher than OSN\_eGFP- AND MVC\_eGFP cells. Additional criteria

1227 for inclusion was mean of expression > standard deviation of expression and mean of expression  
1228 greater than 100.

1229 **b.** Heatmap showing all *Olf* genes differentially expressed between OSN\_eGFP+ and  
1230 OSN\_eGFP- cells identified by DESeq2. MVC\_eGFP cells did not express *Olf*s.

1231 For both a and b, row and column order were determined automatically by the *pHeatmap*  
1232 package in R. For each data point relative expression was calculated by subtracting the average  
1233 row value from each individual value.

1234 **c.** Volcano plot of all Olfactory receptors, demonstrating the small number of enriched olfactory  
1235 receptors in the OSN\_eGFP+ population.

1236 **d.** Hierarchical clustering of transcripts for taste transduction and transcripts expressed in  
1237 canonical and non-canonical OSNs identified by RNAseq as significantly different in expression  
1238 between the cell groups. We compared expression of transcripts involved in taste transduction,  
1239 canonical olfactory transduction, and non-canonical OSNs. The non-canonical OSNs considered  
1240 here included guanylyl-cyclase D (GC-D) OSNs (Juilfs et al., 1997), *Trpc2* OSNs (Omura and  
1241 Mombaerts, 2014), *Cav2.1* OSNs (Pyrski et al., 2018), and OSNs expressing trace amine-  
1242 associated receptors (Taars) (Liberles, 2015). Transcripts identified by DESeq2.

1243

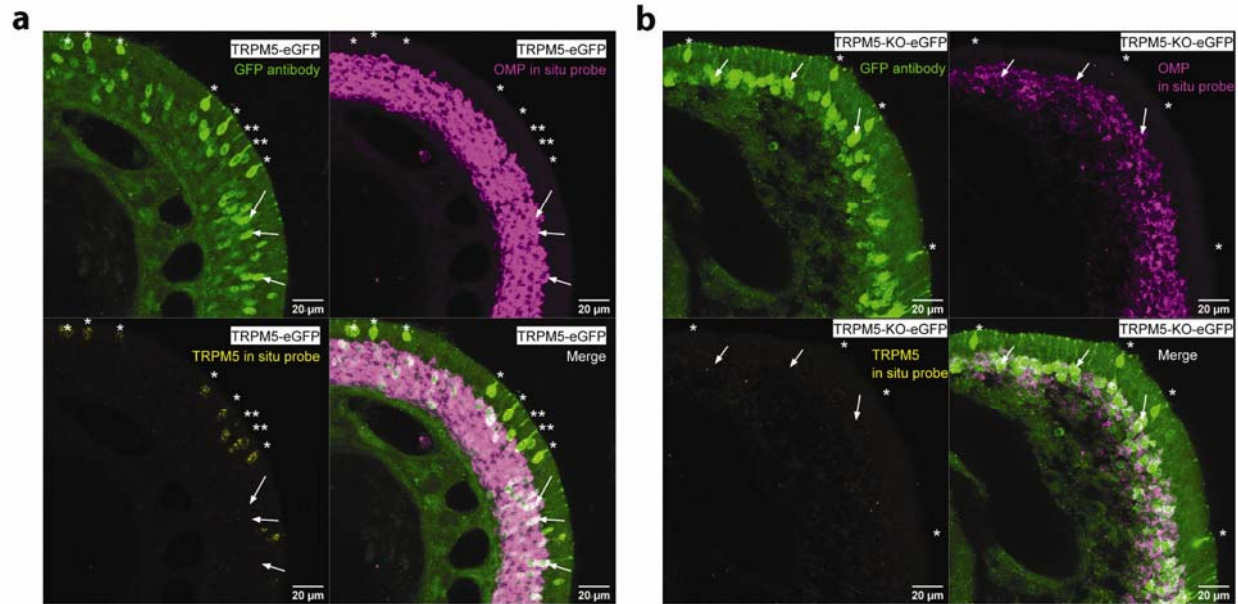

1244

1245

1246 **Figure 5. *In situ* hybridization chain reaction finds strong TRPM5 mRNA expression in**

1247 **MVC\_eGFP cells, but not in the nuclear OSN layer.**

1248 **a.** In situ for TRPM5 (yellow) and OMP (magenta) transcripts in the olfactory epithelium of

1249 TRPM5-GFP mice (GFP is green) shows strong label for TRPM5 in MVCs (asterisks) and

1250 sparse labeling in the OSN nuclear layer (arrows). The scale bar is 20 μm.

1251 **b.** In situ for TRPM5 (yellow) and OMP (magenta) transcripts in the olfactory epithelium of

1252 TRPM5-GFP x TRPM5-knockout mice (GFP is green) shows no label for TRPM5 in GFP-

1253 positive MVCs (asterisks) and does show sparse labeling in the OSN nuclear layer (arrows). The

1254 scale bar is 20 μm.

1255

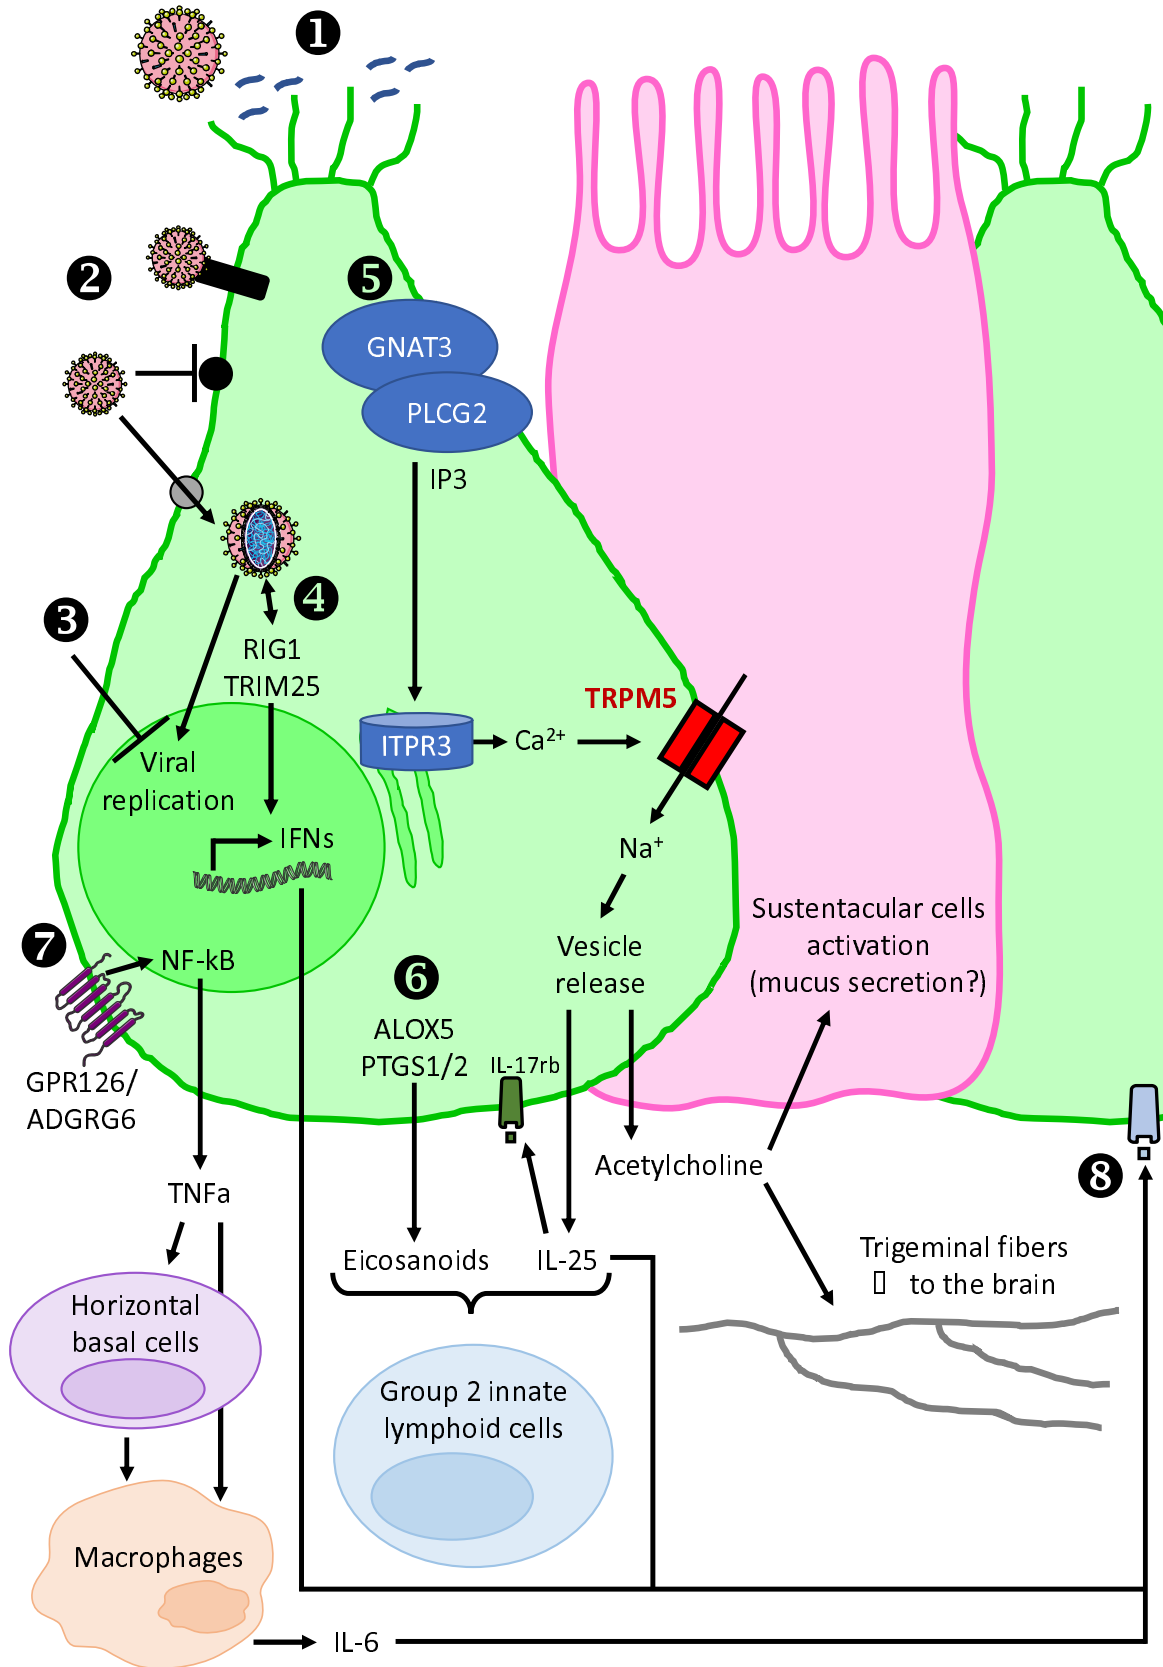



1257 **Figure 6. Model depicting the role for microvillous cells involvement in the olfactory**  
1258 **epithelium innate immune response to viral infection.** 1) Secreted or cell surface  
1259 glycoproteins constitute a first barrier preventing virus entry. 2) When reaching MVC\_eGFP,  
1260 viruses can encounter three types of membrane proteins: adhesion molecules that trigger  
1261 intracellular signaling upon viral recognition (black rectangle), transmembrane proteins that  
1262 block virus entry (black circle), viral receptors allowing virus entry (grey circle). 3) MVC\_eGFP  
1263 express numerous transcriptional factors involved in the inhibition of viral replication. 4)  
1264 Cytosolic viral RNA sensing induces the production of type I interferons. 5) A possible signaling  
1265 pathway leading to intracellular calcium increase, TRPM5 activation and Na<sup>+</sup>-mediated vesicle  
1266 release. Acetylcholine can activate neighboring sustentacular cells and underlying trigeminal  
1267 fibers. 6) Eicosanoids synthesis, along with IL-25 production, can recruit and activate group 2  
1268 innate lymphoid cells, which are key controllers of type 2 inflammation. 7) GPR126 activation  
1269 results in NFκB activation and TNFα production. TNFα can directly activate macrophages.  
1270 TNFα also induces a change in the function of horizontal basal cells, switching their phenotype  
1271 from neuroregeneration to immune defense. 8) Interferons and cytokines can in turn activate  
1272 antiviral immune response in neighboring MVC\_eGFP.

1273

1274

1275

1276

1277  
1278  
1279

## Supplemental Information

1280  
1281

1282 **Transcriptional profiling reveals TRPM5-expressing cells involved in viral infection in the**  
1283 **olfactory epithelium**

1284

1285 B. Dnate' Baxter<sup>1,2,‡</sup>, Eric D. Larson<sup>3,‡</sup>, Paul Feinstein<sup>4</sup>, Arianna Gentile Polese<sup>1,2</sup>, Andrew N.  
1286 Bubak<sup>5</sup>, Christy S. Niemeyer<sup>5</sup>, Laetitia Merle<sup>1,2</sup>, Doug Shepherd<sup>6</sup>, Vijay R. Ramakrishnan<sup>3</sup>,  
1287 Maria A. Nagel<sup>5</sup>, and Diego Restrepo<sup>1,2,\*</sup>

1288

1289



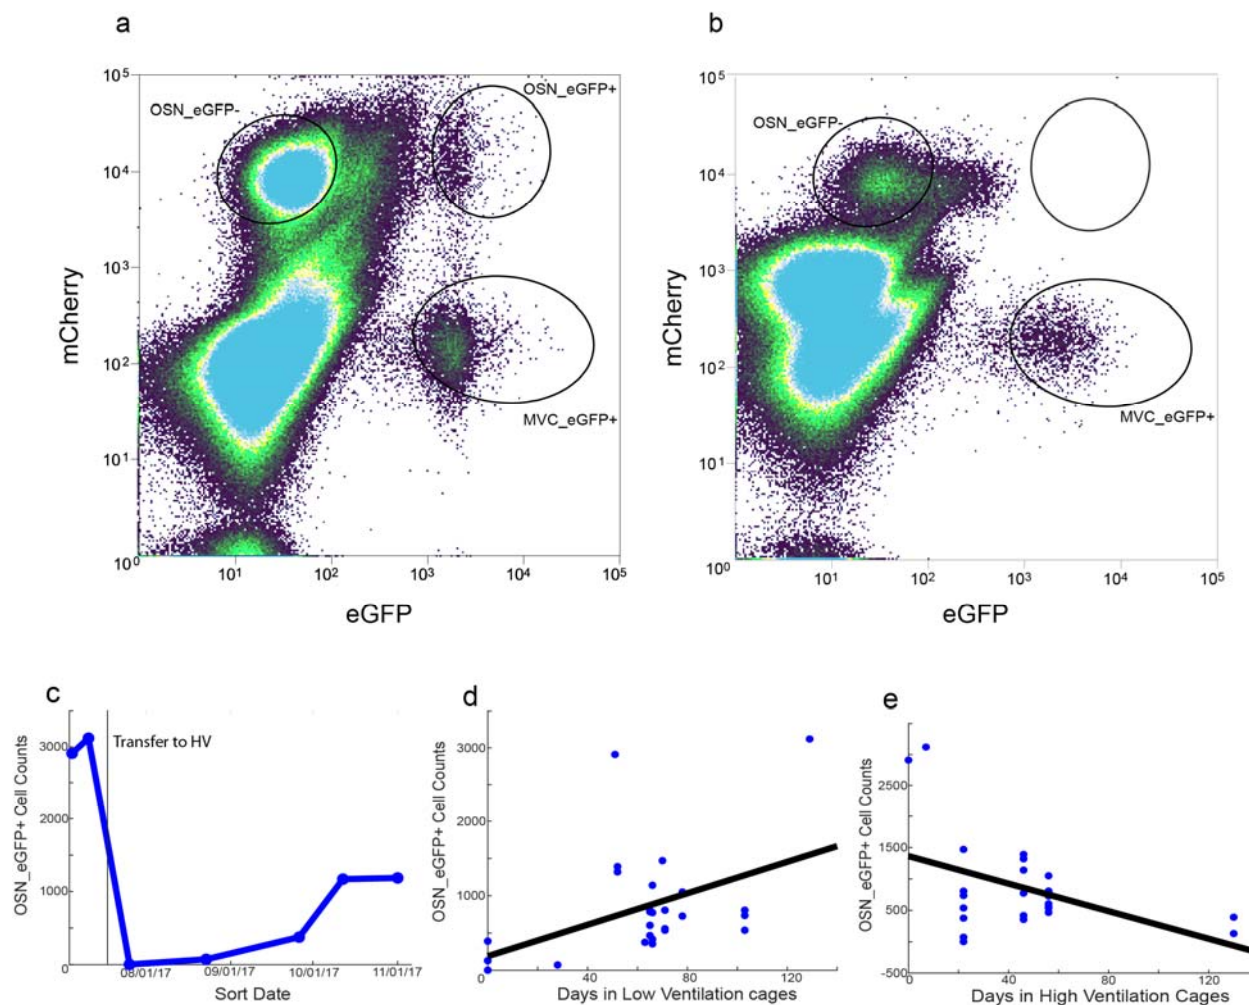

1290  
1291 **Figure 1, figure supplement 1. Decreased yield of OSN\_eGFP+ cells when mice are moved**

1292 **from low ventilation (LV) to high ventilation (HV) cages.**

1293 **a and b.** Distribution of mCherry and eGFP fluorescence intensity for FACS-sorted cells that  
1294 either were not transferred to HV cages (**a**) or were transferred to HV cages for 22 days before  
1295 sorting (**b**).

1296 **c.** Time course showing change in the number of sorted OSN\_eGFP+s after mice were  
1297 transferred to HV cages.

1298 **d and e.** Dependence of the yield of OSN\_eGFP+ cells after sorting on the number of days in  
1299 LV cages (**d**) or the number of days in HV cages (**e**).

1300

1301 **Figure 2 – figure supplement 1. Excel worksheet with the results of comparison of gene**  
1302 **transcription between MVC\_eGFP and OSN\_eGFP-.**

1303

1304 **Figure 2 - figure supplement 2. Significant differences in gene ontology for MVC\_eGFP+**  
1305 **compared to OSN\_eGFP-.**

1306

1307 **Figure 2 - figure supplement 3. Metadata for the RNAseq.**

1308

1309

1310

1311

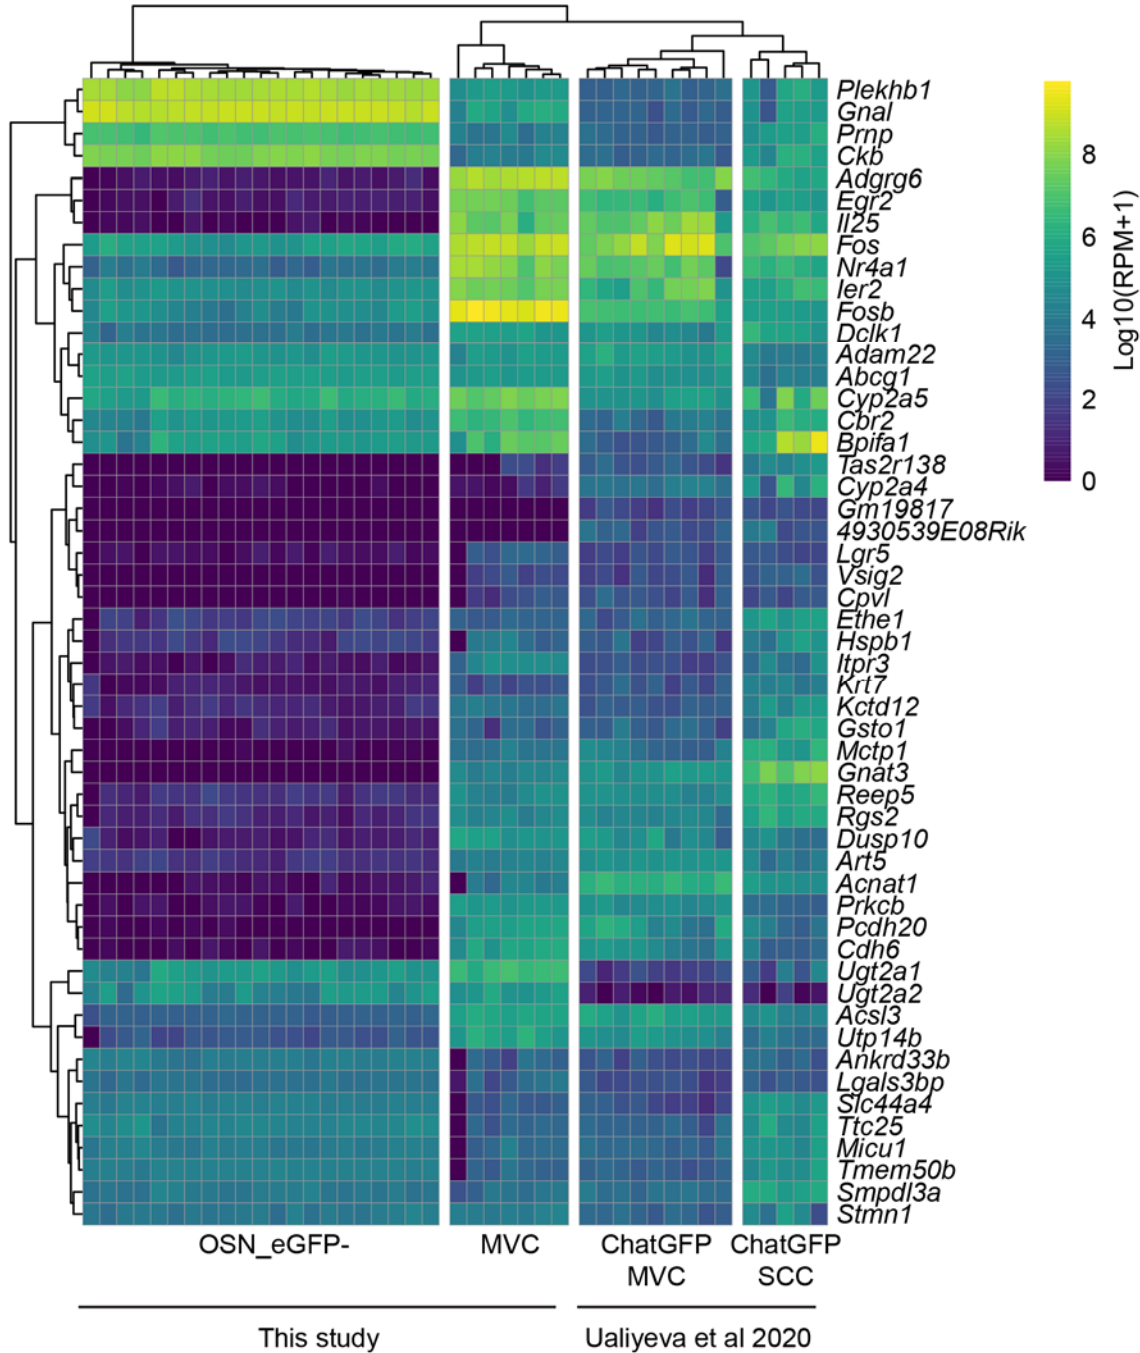

1312

1313 **Figure 2 – figure supplement 4.** Comparisons of gene expression between MVC\_eGFP and  
 1314 OSN\_eGFP- cells of this study and ChAT-eGFP MVCs and ChAT-eGFP SCCs profiled in the  
 1315 respiratory epithelium in the study of Ualiyeva and co-workers (Ualiyeva et al., 2020). This

1316 comparison is of limited value due to the fact that the gene profiling was performed in two

1317 separate studies.

1318

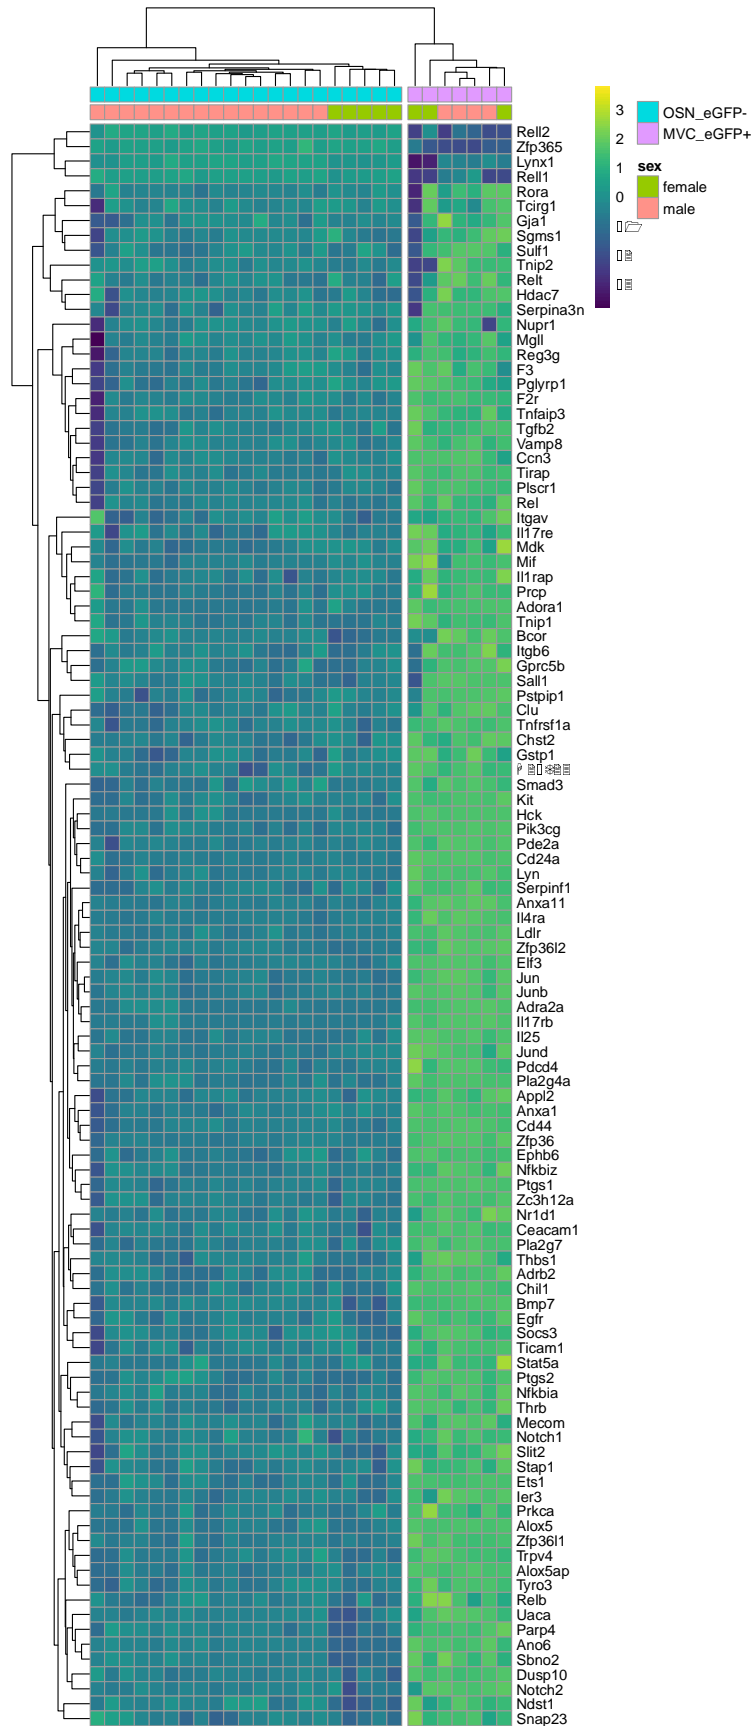

1320 **Figure 3- figure supplement 1. Significant differences in inflammation gene ontology for**

1321 **MVC\_eGFP+ compared to OSN\_eGFP-.**

1322



1324 **Figure 3- figure supplement 2. Significant differences in immunity gene ontology for**

1325 **MVC\_eGFP+ compared to OSN\_eGFP-.**

1326



1327 **Figure 4 – figure supplement 1. Excel worksheet with the results of comparison of gene**  
1328 **transcription between OSN\_EGFP+ and OSN\_EGFP-.**

1329

1330

1331

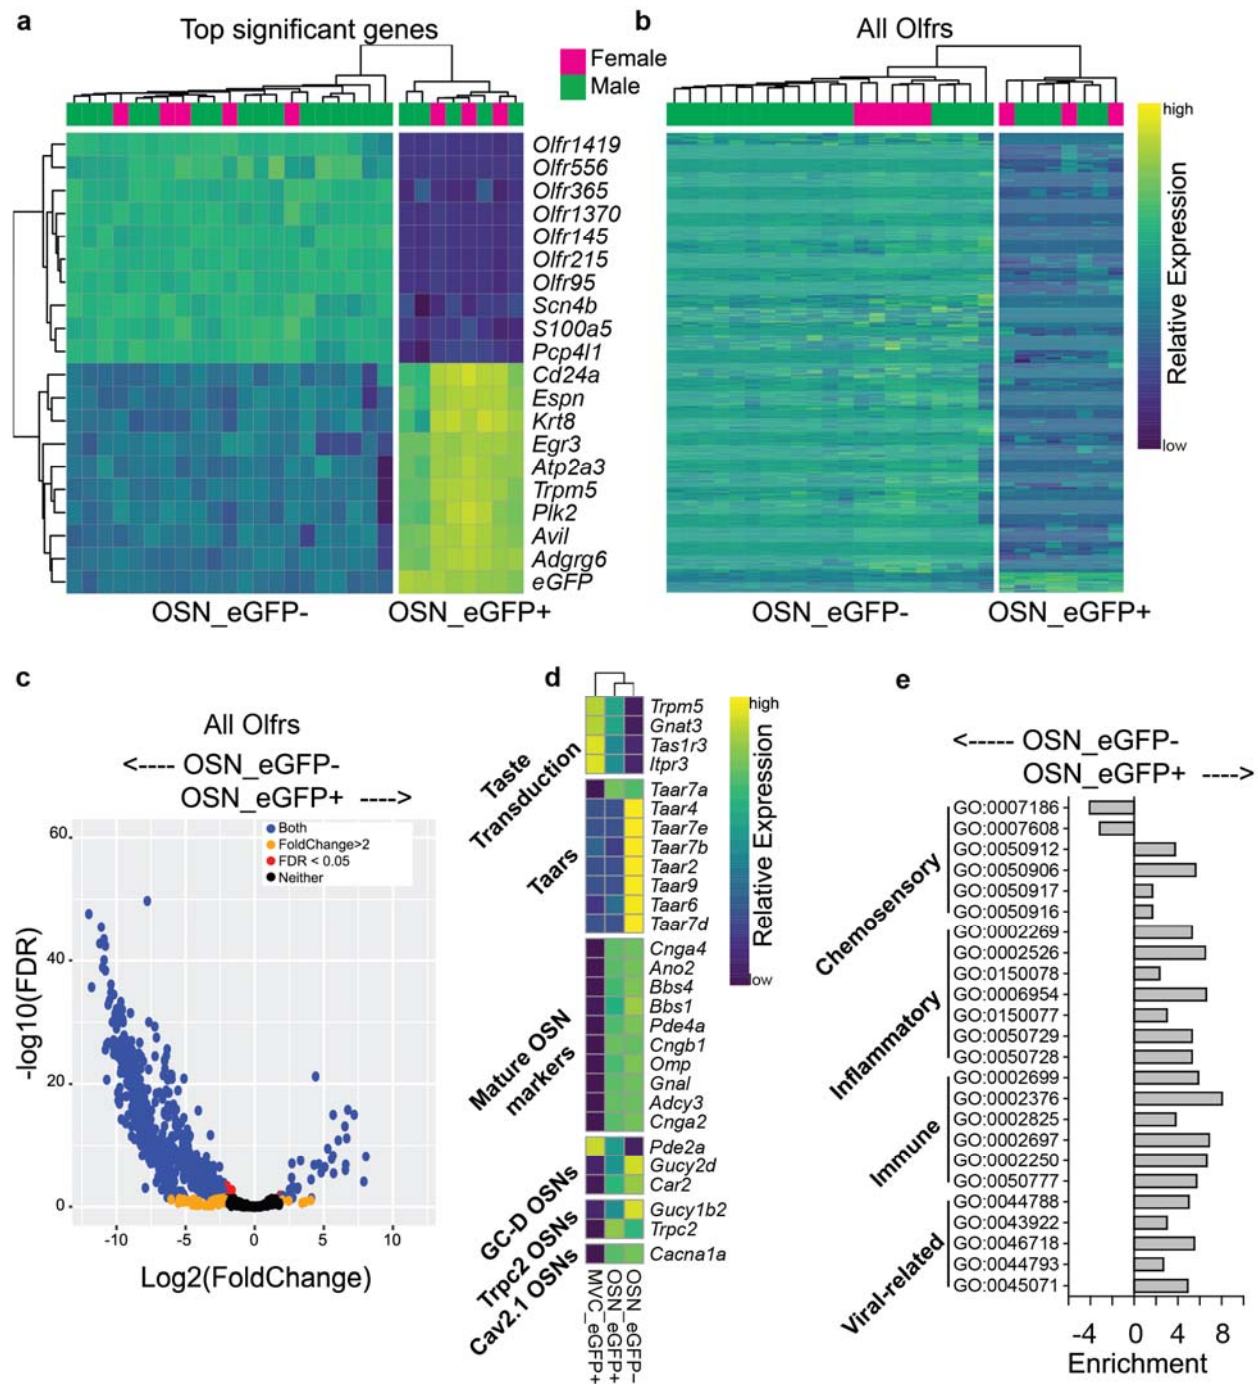

1332

1333 **Figure 4 – figure supplement 2. RNAseq comparison of OSN\_eGFP- and OSN\_eGFP+**

1334 **cells.**

1335 **a.** Heatmap showing the top 10 upregulated and top 10 downregulated genes identified by

1336 DESeq2.

1337 **b.** Heatmap showing all *Olf* genes detected in the data.

1338 For both a and b, row and column order were determined automatically by the *pHeatmap*

1339 package in R. For each data point relative expression was calculated by subtracting the average

1340 row value from each individual value.

1341 **c.** Volcano plot of all Olfactory receptors, demonstrating the small number of enriched olfactory

1342 receptors in the OSN\_eGFP+ population.

1343 **d.** Hierarchical clustering of transcripts for taste transduction and transcripts expressed in

1344 canonical and non-canonical OSNs identified by RNAseq as significantly different in expression

1345 between the cell groups. We compared expression of transcripts involved in taste transduction,

1346 canonical olfactory transduction, and non-canonical OSNs. The non-canonical OSNs considered

1347 here included guanylyl-cyclase D (GC-D) OSNs (Juilfs et al., 1997), Trpc2 OSNs (Omura and

1348 Mombaerts, 2014), Cav2.1 OSNs (Pyrski et al., 2018), and OSNs expressing trace amine-

1349 associated receptors (Taars) (Liberles, 2015). Transcripts identified by DESeq2.

1350 **e.** Gene ontology (GO) term enrichment was calculated from differentially expressed genes using

1351 *TopGO* in R. An enrichment value for genes with Fischer p value <0.05 was calculated by

1352 dividing the number of expressed genes within the GO term by the number expected genes (by

1353 random sampling, determined by *TopGO*).

1354

1355 **Figure 4 - figure supplement 3. Excel worksheet with the results of comparison of gene**  
1356 **transcription between MVC\_eGFP cells and OSN\_eGFP+.**

1357

1358

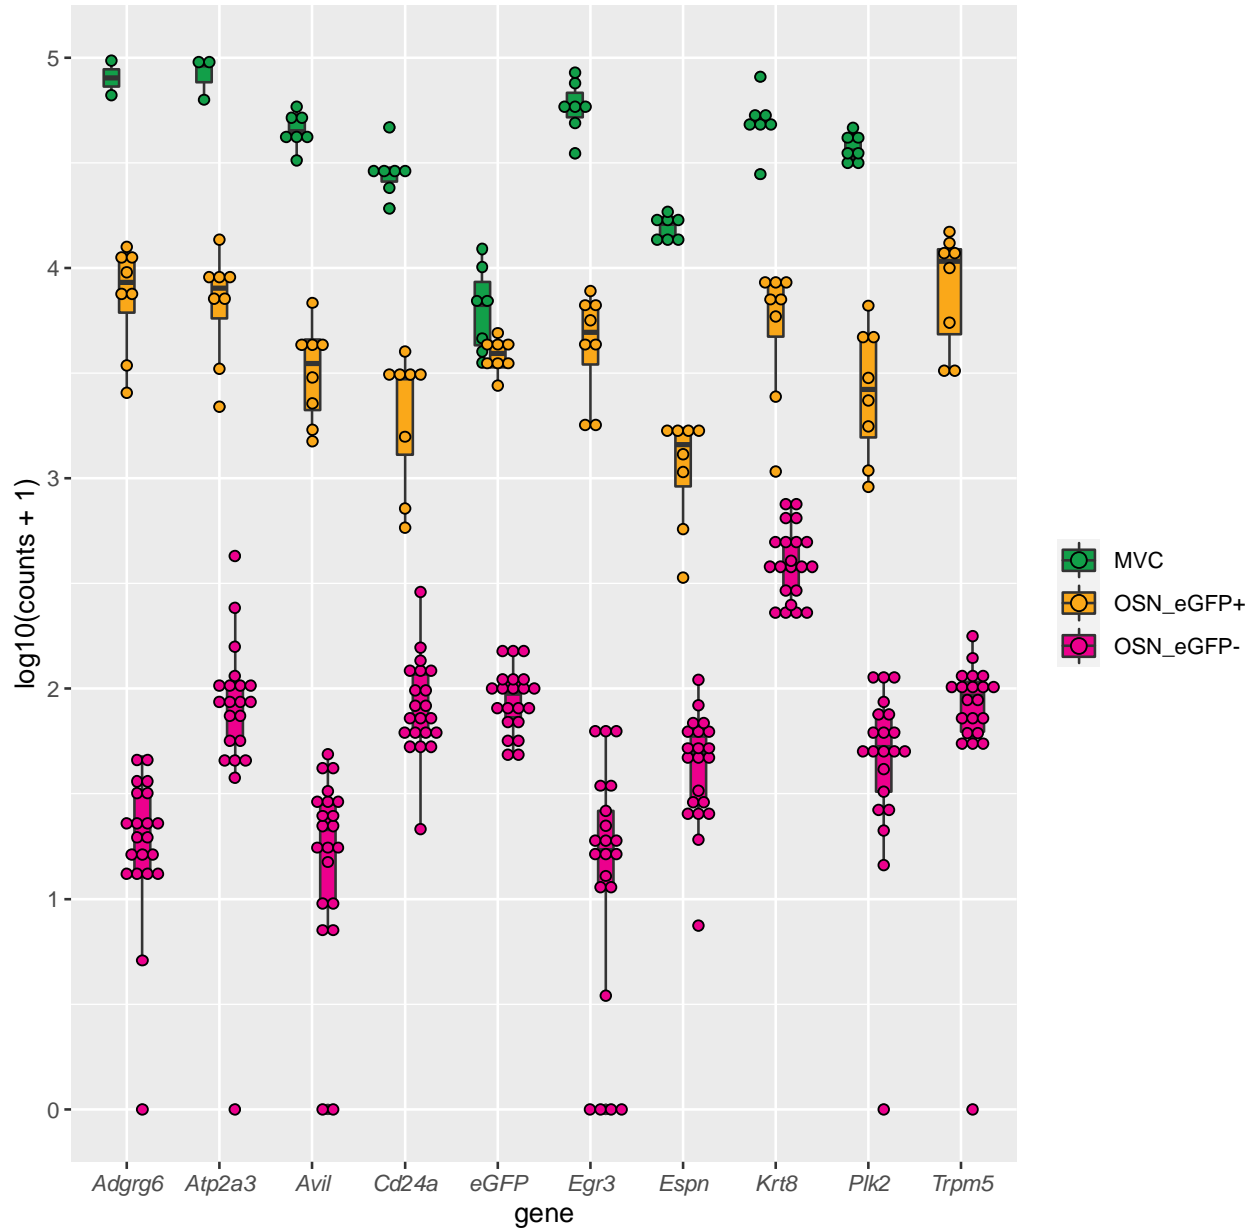

1359

1360 **Figure 4 figure supplement 4.** Boxplot showing expression levels for the top 10 genes that are  
1361 significantly higher in OSN\_eGFP+ vs. OSN\_eGFP-.

1362

1363 **Figure 4 - figure supplement 5.** Excel worksheet with the results of genes whose  
1364 transcription levels were significantly higher in OSN\_eGFP+ compared to both  
1365 MVC\_eGFP cells and OSN\_eGFP+.

1366

1367 **Figure 4 figure supplement 6. GOnet analysis for the 80 genes whose transcription levels**

1368 **were significantly higher in OSN\_eGFP+ compared to both MVC\_eGFP cells and**

1369 **OSN\_eGFP+. <https://tools.dice-database.org/GOnet/job0c0357f0-d489-467d-adb7->**

1370 **[9d33b52ff850/result](https://tools.dice-database.org/GOnet/job0c0357f0-d489-467d-adb7-9d33b52ff850/result)**

1371

1372

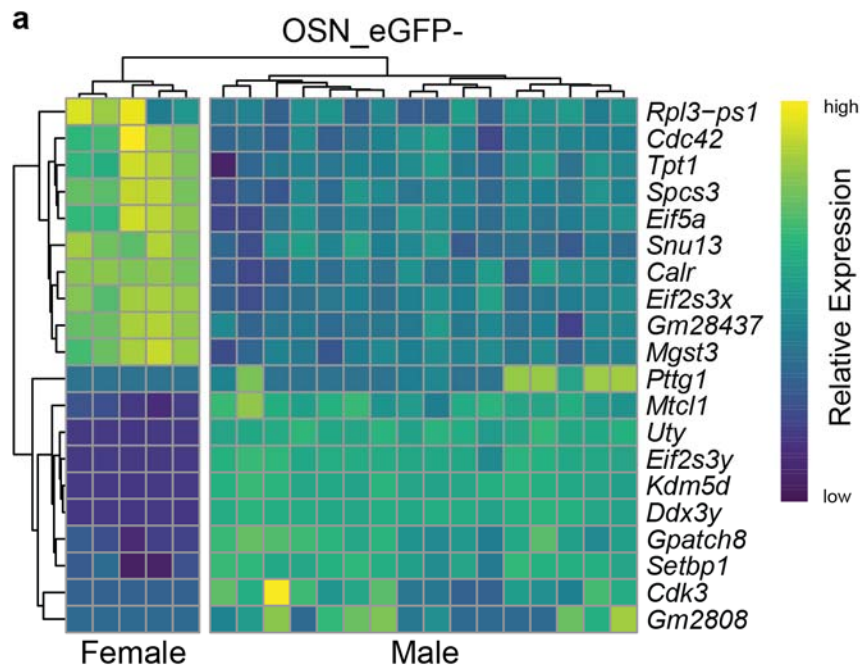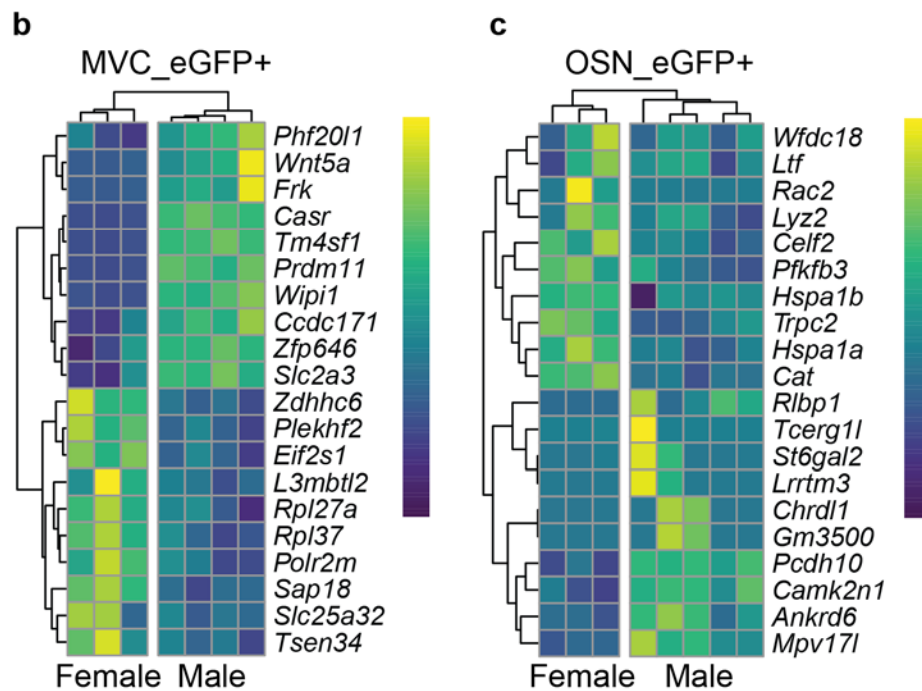

1373

1374 **Figure 4 – figure supplement 7. Hierarchical clustering of transcripts identified by RNAseq**

1375 **as significantly differentially expressed between male and female. a. OSN\_eGFP-. b.**

1376 **MVC\_eGFP cells c. OSN\_eGFP+. Transcripts identified by DESeq2.**

1377

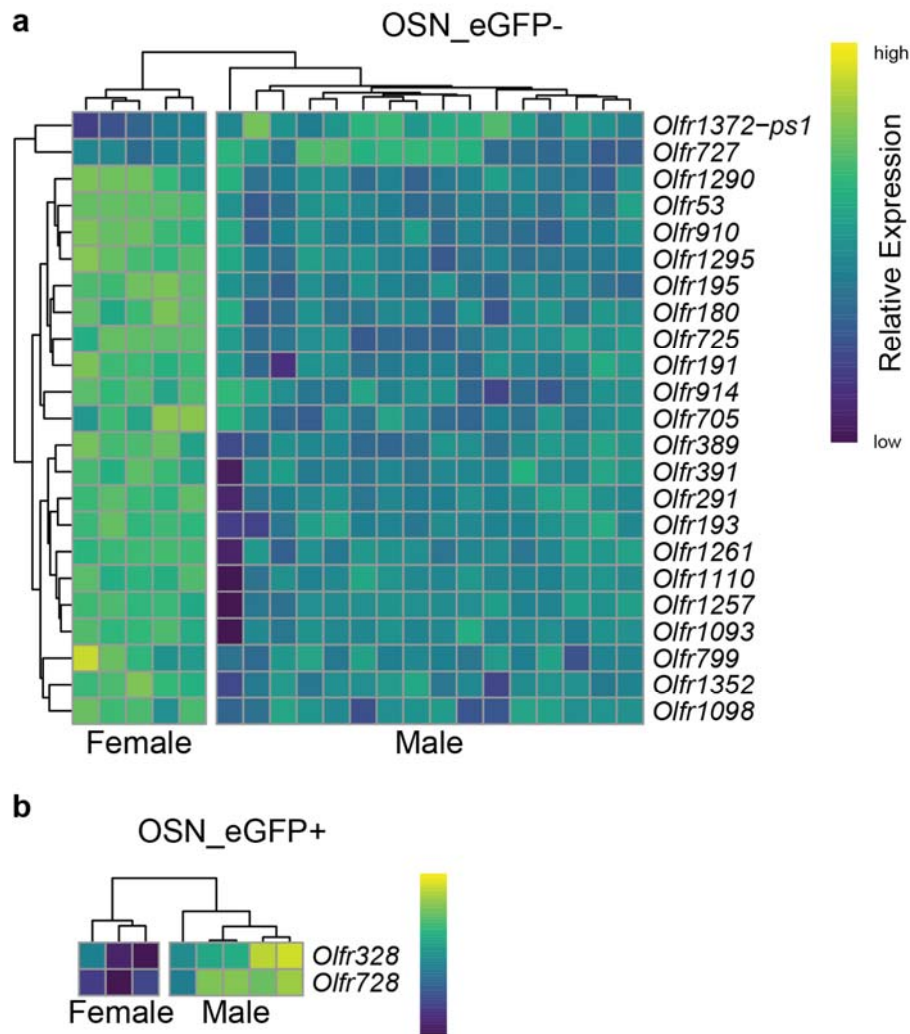

1378

1379 **Figure 4 – figure supplement 8. Hierarchical clustering of olfactory receptor transcripts**

1380 **identified by RNAseq as significantly differentially expressed between male and female. a.**

1381 OSN\_eGFP-. **b.** OSN\_eGFP+. Transcripts identified by DESeq2.

1382



1383

1384 **Figure 5 – figure supplement 1. Movie showing 3D rendering of HCR v3.0 *in situ***

1385 **hybridization for TRPM5.** Images were acquired with a high numerical aperture (NA) oblique

1386 plane microscope (Sapoznik et al., 2020). *In situ* is shown for TRPM5 (yellow) and OMP

1387 (green). DAPI is in blue.

1388

1389

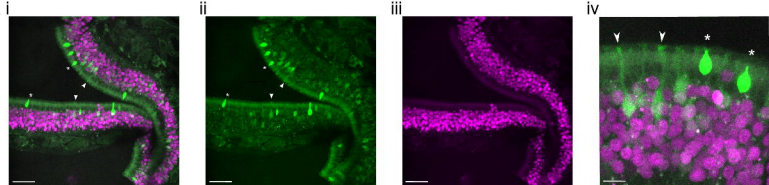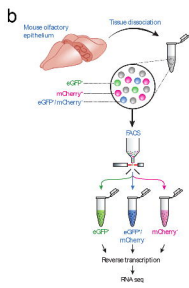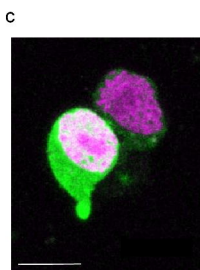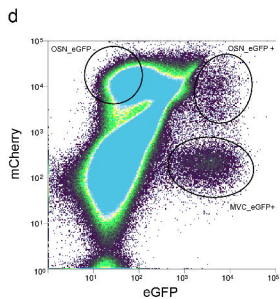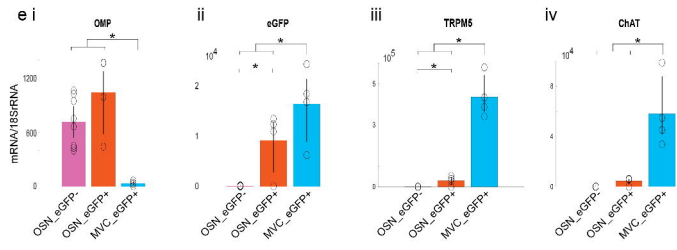

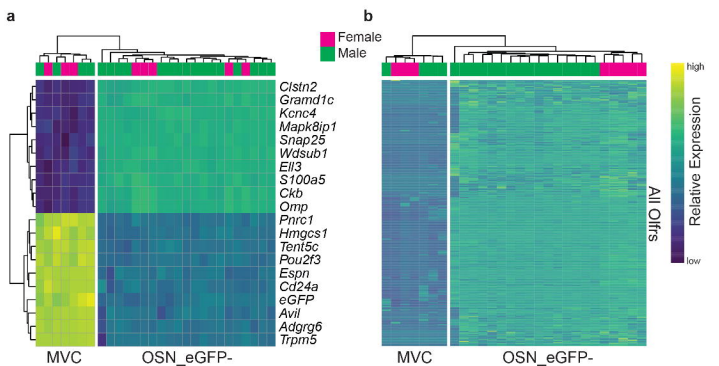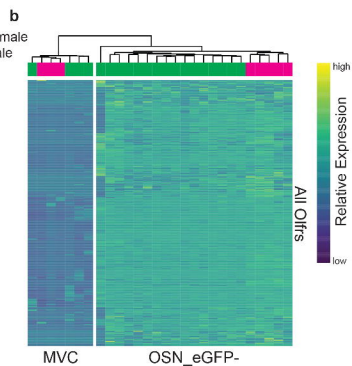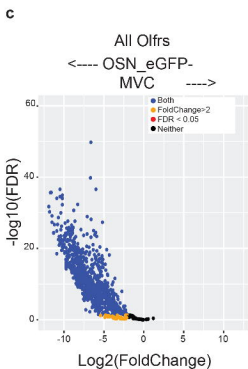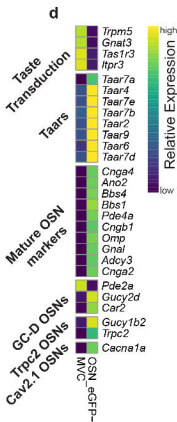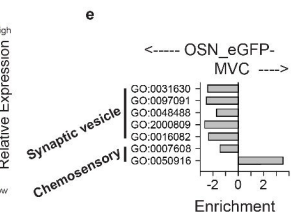

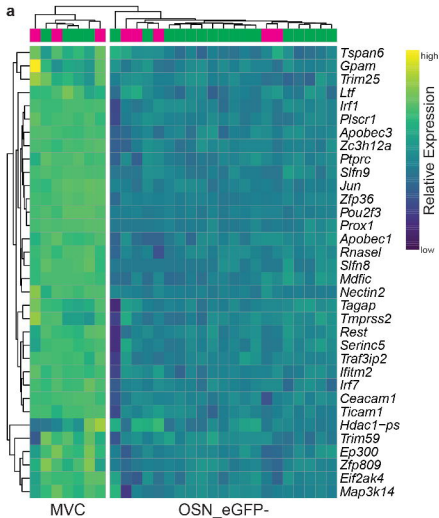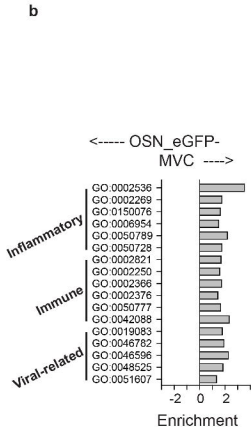

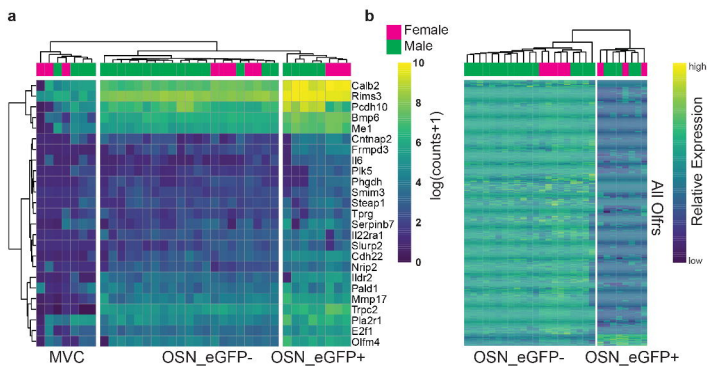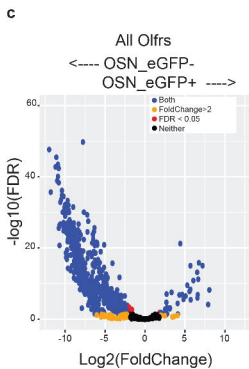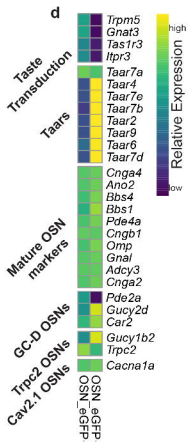

**a**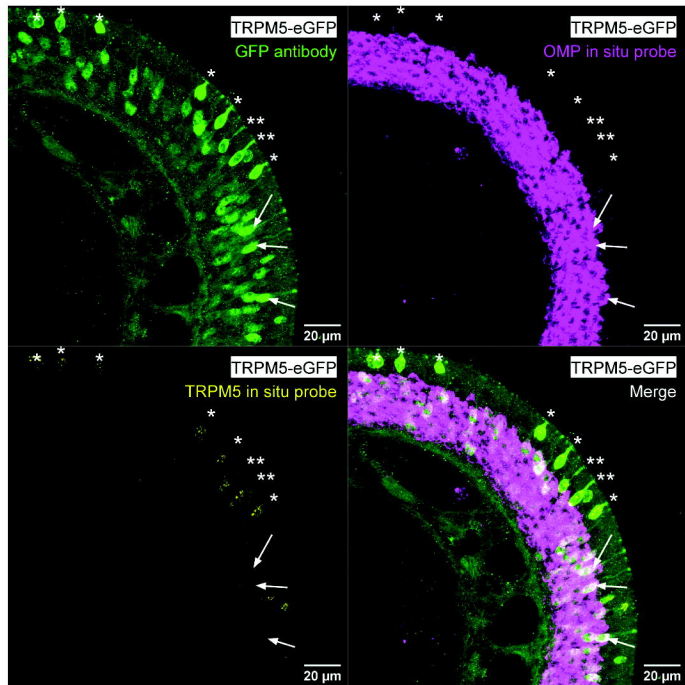**b**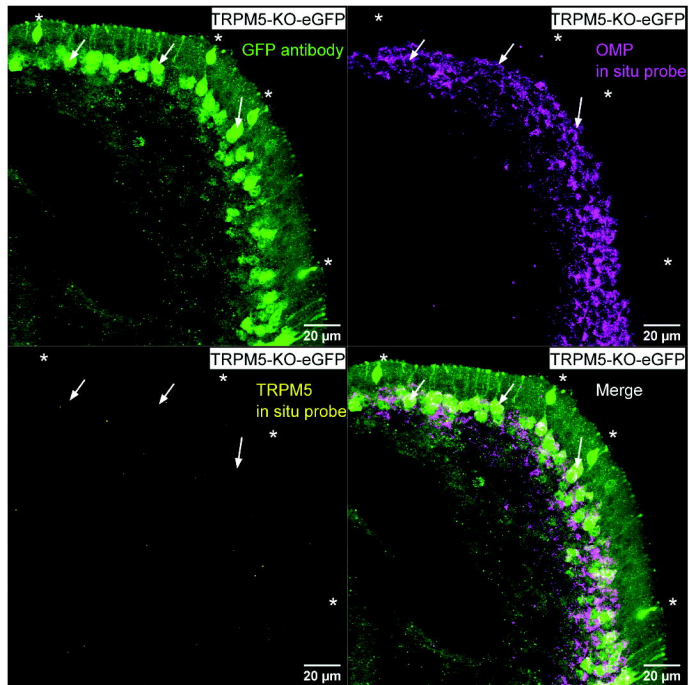

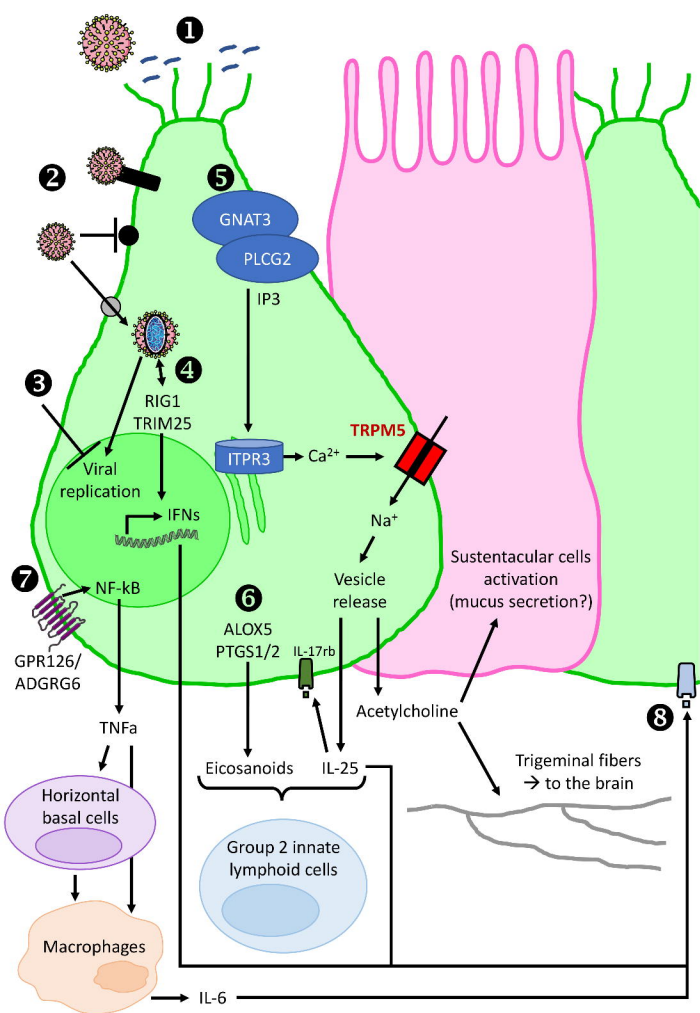

Source: https://www.biorxiv.org/content/10.1101/2020.05.14.096016v3.full.pdf
